# Supplementary material for: Protecting-group-free mechanosynthesis of amides from hydroxycarboxylic acids: application to the synthesis of imatinib
Source: Royal Society of Chemistry journal article supplement (doi:10.1039/d4mr00006d), 2024-01-01

## Supporting Information

# Protecting-Group-Free Mechanosynthesis of Amides from Hydroxycarboxylic Acids: Application to the Synthesis of Imatinib

Tatsiana Nikonovich,<sup>a</sup> Tatsiana Jarg,<sup>a</sup> Jevgenija Martõnova,<sup>a</sup> Artjom Kudrjašov,<sup>a,b</sup> Danylo Merzhyievskyi,<sup>a,c</sup> Marina Kudrjašova,<sup>a</sup> Fabrice Gallou,<sup>d</sup> Riina Aav,<sup>a\*</sup> and Dzmitry Kananovich<sup>a\*</sup>

<sup>a</sup> Department of Chemistry and Biotechnology, Tallinn University of Technology, Akadeemia tee 15, 12618, Tallinn, Estonia

<sup>b</sup> Tallinna Tõnismäe Reaalkool, Pärnu mnt 50, Tallinn, Estonia

<sup>c</sup> Department of Chemistry of Bioactive Nitrogen-containing Heterocyclic Bases, V. P. Kukhar Institute of Bioorganic Chemistry and Petrochemistry, National Academy of Sciences of Ukraine, Academician Kukhar Str. 1, 02094 Kyiv, Ukraine

<sup>d</sup> Novartis Pharma AG ; Novartis Campus, 4056 Basel, Switzerland; [orcid.org/0000-0001-8996-6079](https://orcid.org/0000-0001-8996-6079); e-mail: [fabrice.gallou@novartis.com](mailto:fabrice.gallou@novartis.com)

E-mails: [dzmitry.kananovich@taltech.ee](mailto:dzmitry.kananovich@taltech.ee), [riina.aav@taltech.ee](mailto:riina.aav@taltech.ee)

## Table of Content

|                                                                                                                                                   |    |
|---------------------------------------------------------------------------------------------------------------------------------------------------|----|
| General information .....                                                                                                                         | 2  |
| 1. Screening experiments .....                                                                                                                    | 3  |
| 2. General procedure and characterization of products .....                                                                                       | 6  |
| 3. Preparation of intermediate <b>18</b> : optimization studies.....                                                                              | 10 |
| 4. Preparation of Imatinib <b>2</b> from amide <b>18</b> : optimization studies.....                                                              | 14 |
| 5. SC-XRD characterization of <b>18</b> . ....                                                                                                    | 17 |
| 6. Determination of Amine <b>16</b> (Impurity F) according to the European Pharmacopoeia and optimization studies for its content reduction. .... | 19 |
| 6.1. Quantification of Amine <b>16</b> . ....                                                                                                     | 19 |
| 6.2. Optimization studies for reducing the content of amine <b>16</b> .....                                                                       | 20 |
| 7. Green Chemistry metrics.....                                                                                                                   | 23 |
| 8. References .....                                                                                                                               | 40 |
| 9. <sup>1</sup> H and <sup>13</sup> C NMR data.....                                                                                               | 41 |



## General information

All reagents were purchased from commercial suppliers (Fluorochem, BLD pharm, Sigma-Aldrich and Alfa Aesar) and used without further purification. Amine **16** is commercially available from BLDpharm (65 €/mol). Inorganic salts (e.g.,  $\text{K}_2\text{HPO}_4$ ,  $\text{K}_4\text{P}_2\text{O}_7$ ) were dried prior to use by heating under reduced pressure. Mechanochemical experiments were carried out in a FTS-1000 shaker mill at 30 Hz frequency by using 14 mL  $\text{ZrO}_2$ -coated milling jars with 10 mm  $\text{ZrO}_2$  milling balls.

Silica gel 40 – 63  $\mu\text{m}$  was used for column chromatography; silica gel 60  $\text{F}_{254}$  plates were used for TLC. Visualization of TLC plates was performed by ninhydrin stain.  $^1\text{H}$  NMR (400 MHz) and  $^{13}\text{C}$  NMR (100.6 MHz) spectra were recorded on Bruker Avance III spectrometer. Chemical shifts were referenced to residual protio solvent peaks and solvent resonances ( $\delta$   $^1\text{H}$  7.26 and  $\delta$   $^{13}\text{C}$  77.16 measured in  $\text{CDCl}_3$ ,  $\delta$   $^1\text{H}$  2.50 and  $\delta$   $^{13}\text{C}$  39.52 measured in  $\text{DMSO}-d_6$ ;  $\delta$   $^1\text{H}$  3.31 and  $\delta$   $^{13}\text{C}$  49.00 measured in  $\text{CD}_3\text{OD}$ ) as internal standards for  $^1\text{H}$  NMR and  $^{13}\text{C}$  NMR spectra, respectively. All chemical shifts are reported in ppm units. HPLC analysis was carried out on Agilent 1200 Series HPLC system equipped with a multiple wavelength detector (MWD) and a single quadrupole mass detector (MSD). HRMS data was obtained on Agilent Technologies 6540 UHD Accurate-Mass Q-TOF LC/MS system using AJS-ESI method in positive ion detection mode. Single crystal X-ray diffraction data was collected at 123K on Rigaku Compact HomeLab diffractometer, equipped with a Saturn 944 HG CCD detector and Oxford Cryostream cooling system using monochromatic  $\text{Cu}-K\alpha$  radiation (1.54178Å) from a MicroMax<sup>TM</sup>-003 sealed tube microfocus X-ray source. Melting points were determined with Stuart SMP40 apparatus.



# 1. Screening experiments

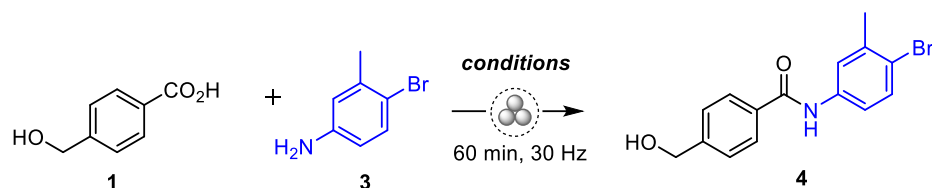

*Reaction conditions:* 4-(hydroxymethyl)benzoic acid **1** (100 mg, 0.657 mmol), amine **3** (110–122 mg, 0.592–0.657 mmol, 0.9–1 equiv.) and 1,3,5-trimethoxybenzene (~11 mg) as a standard were used in the reactions performed according to the published protocols.<sup>1–4</sup> Ethyl ester of 4-(hydroxymethyl)benzoic acid **S1** was prepared according to the literature procedure.<sup>5</sup>

All the reactants (acid, amine, base and coupling reagent) and LAG additive (the latter) were placed into a 14 mL ZrO<sub>2</sub>-coated jar charged with a single 10 mm ZrO<sub>2</sub> milling ball. The jar was then set to mill at 30 Hz for 60 minutes. The resulting crude reaction mixture was analysed by <sup>1</sup>H NMR using CD<sub>3</sub>OD as a solvent, after separation of insoluble inorganic material (Table S1).

**Table S1.** Screening experiments

| Entry | Coupling reagent            | Base                                          | LAG<br>( $\eta$ , $\mu\text{L}\cdot\text{mg}^{-1}$ ) | Yield of <b>4</b> , % <sup>a</sup> | References                     |
|-------|-----------------------------|-----------------------------------------------|------------------------------------------------------|------------------------------------|--------------------------------|
| 1     | EDC (1 equiv.)              | -                                             | CH <sub>3</sub> NO <sub>2</sub><br>(0.25)            | 88 (87) <sup>b</sup>               | Štrukil et al. <sup>1</sup>    |
| 2     | EDC (1 equiv.)              | -                                             | Sulfolane<br>(0.25)                                  | 92 (87) <sup>b</sup>               |                                |
| 3     | EDC (1 equiv.)              | -                                             | EtOAc<br>(0.25)                                      | 90 (89) <sup>b</sup>               |                                |
| 4     | EDC (1 equiv.)              | DMAP<br>(2 equiv.)                            | CH <sub>3</sub> NO <sub>2</sub><br>(0.25)            | 0 <sup>e</sup>                     | Dalidovich et al. <sup>2</sup> |
| 5     | COMU (1.1 equiv.)           | K <sub>2</sub> HPO <sub>4</sub><br>(3 equiv.) | EtOAc<br>(0.19)                                      | 83 <sup>f</sup>                    |                                |
| 6     | TCFH (1.1 equiv.)           | K <sub>2</sub> HPO <sub>4</sub><br>(3 equiv.) | EtOAc<br>(0.19)                                      | 26 <sup>g</sup>                    |                                |
| 7     | TCFH (1.1 equiv.)           | NMI (3 equiv.)                                | without                                              | 74 <sup>h</sup>                    | Métro et al. <sup>3</sup>      |
| 8     | CDI (1 equiv.) <sup>c</sup> | -                                             | without                                              | 10 <sup>i</sup>                    |                                |
| 9     | -                           | <i>t</i> -BuOK <sup>d</sup><br>(0.85 equiv.)  | without                                              | 0 <sup>j</sup>                     | Nicholson et al. <sup>4</sup>  |

<sup>a</sup> Conversion of **1** into amide **4**, as determined by <sup>1</sup>H NMR (characteristic signals of aromatic CH protons from 1,3,5-trimethoxybenzene standard at  $\delta$  6.06 ppm and aromatic CH proton from amide **4** at  $\delta$  7.65 ppm were integrated). <sup>b</sup> In parenthesis, the yield of isolated amide **4** is given (after washing with water and further drying in air). <sup>c</sup> Acid **1** was pre-milled with CDI for 5 minutes, then amine was added, followed by milling for 60 minutes (according to the published conditions). <sup>d</sup> Ethyl 4-(hydroxymethyl)benzoate **S1** (0.789 mmol, 1.2 equiv., 142 mg) was used instead of **1** according to the published protocol. <sup>e</sup> Mixture of by-products and the starting materials was obtained. <sup>f</sup> Ester-type by-products derived from self-condensation of **1** (characteristic signals of benzylic CH<sub>2</sub>



at  $\delta$  5.5–5.3 ppm in  $^1\text{H}$  NMR) and guanidinium derivative **3b** (ca. 12% yield) were observed. <sup>g</sup> Guanidinium salt **3a** was formed as the main product (ca. 75% yield). <sup>h</sup> Incomplete conversion of starting amine **3** and generation of **3a** were observed. <sup>i</sup> Ester-type by-products derived from **1** and unreacted amine **3** were observed. <sup>j</sup> Unreacted starting materials.

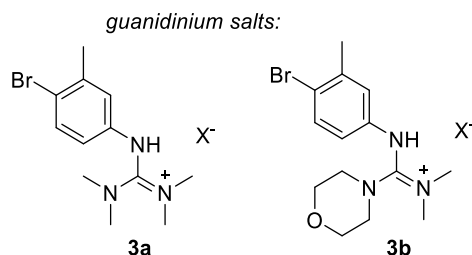

#### *The reaction of amine **3** with TCFH/ $\text{K}_2\text{HPO}_4$ .*

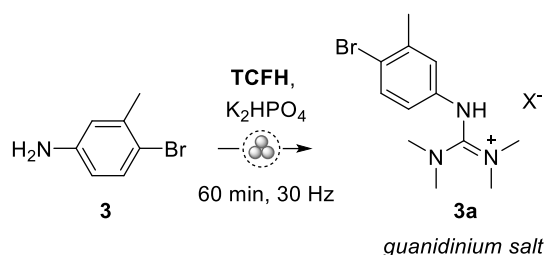

Amine **3** (122 mg, 0.657 mmol), TCFH (203 mg, 0.723 mmol, 1.1 equiv.),  $\text{K}_2\text{HPO}_4$  (343 mg, 1.972 mmol, 3 equiv.), 1,3,5-trimethoxybenzene (~11 mg) and EtOAc (127  $\mu\text{L}$ ) were placed into a 14 mL  $\text{ZrO}_2$ -coated jar charged with a single 10 mm  $\text{ZrO}_2$  milling ball. The jar was then set to mill at 30 Hz for 60 minutes. The resulting crude reaction mixture was analysed by  $^1\text{H}$  NMR using  $\text{CD}_3\text{OD}$  as a solvent, after separation of insoluble inorganic material. Characteristic signals of guanidinium salt **3a** in  $^1\text{H}$  NMR ( $\text{CD}_3\text{OD}$ , 400 MHz):  $\delta$  7.57 (d,  $J$  = 8.5 Hz, 1H), 7.01 (d,  $J$  = 2.7 Hz, 1H), 6.79 (ddd,  $J$  = 8.5, 2.7, 0.7 Hz, 1H), 2.98 (s, 12H), 2.40 (s, 3H).

#### *The reaction of 4-(hydroxymethyl)benzoic acid **1** with EDC.*

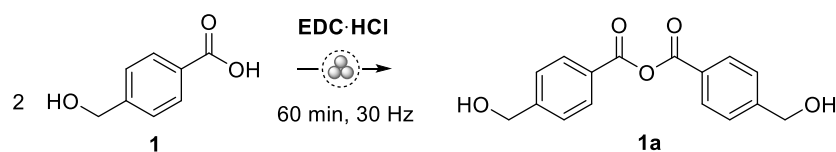

Acid **1** (100 mg, 0.657 mmol), EDC·HCl (126 mg, 0.657 mmol, 1 equiv.) and EtOAc (57  $\mu\text{L}$ ) were placed into a 14 mL  $\text{ZrO}_2$ -coated jar charged with a single 10 mm  $\text{ZrO}_2$  milling ball. The jar was then set to mill at 30 Hz for 60 minutes. The resulting crude reaction mixture was analysed by  $^1\text{H}$  NMR using  $\text{CD}_3\text{OD}$  as a solvent, after separation of insoluble inorganic material. Characteristic signals of anhydride **1a** in  $^1\text{H}$  NMR ( $\text{CD}_3\text{OD}$ , 400 MHz):  $\delta$  8.13 (d,  $J$  = 7.9 Hz, 4H), 7.57 (d,  $J$  = 7.9 Hz, 4H), 4.73 (s, 4H). HRMS (AJS-ESI) calcd. for  $\text{C}_{16}\text{H}_{14}\text{O}_5\text{Na}^+$   $[\text{M}+\text{Na}]^+$  309.0733, found  $m/z$  309.0734.



The reaction of amide **4** with 4-(hydroxymethyl)benzoic acid **1**.

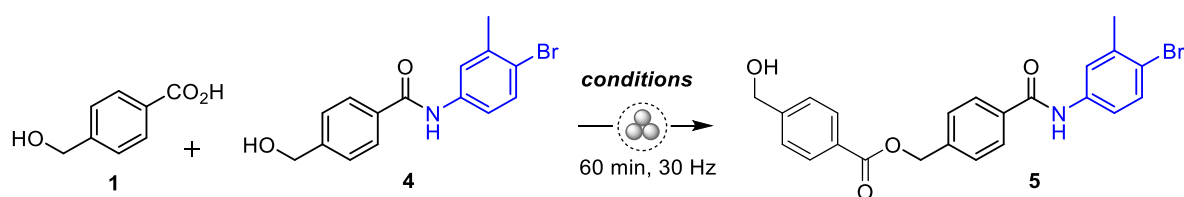

**Reaction conditions:** amide **4** (0.19 mmol, 60 mg), 4-(hydroxymethyl)benzoic acid **1** (29 mg, 0.19 mmol), coupling reagent (36–88 mg, 1–1.1 equiv.), base (45–98 mg, 3 equiv.) and LAG additive ( $\eta = 0.19\text{--}0.25\text{ }\mu\text{L}\cdot\text{mg}^{-1}$ ) were placed into a 14 mL ZrO<sub>2</sub>-coated jar charged with a single 10 mm ZrO<sub>2</sub> milling ball. The jar was then set to mill at 30 Hz for 60 minutes. The resulting crude reaction mixture was analysed by <sup>1</sup>H NMR using CD<sub>3</sub>OD as a solvent, after separation of insoluble inorganic material (Table S2).

**Table S2.** Screening experiments

| Entry | Coupling reagent | Base                            | LAG<br>( $\eta$ , $\mu\text{L}\cdot\text{mg}^{-1}$ ) | Yield of <b>5</b> , % <sup>a</sup> |
|-------|------------------|---------------------------------|------------------------------------------------------|------------------------------------|
| 1     | TCFH             | K <sub>2</sub> HPO <sub>4</sub> | EtOAc (0.19)                                         | 5 <sup>b</sup>                     |
| 2     | COMU             | K <sub>2</sub> HPO <sub>4</sub> | EtOAc (0.19)                                         | 31                                 |
| 3     | TCFH             | NMI                             | -                                                    | 40                                 |
| 4     | EDC              | -                               | EtOAc (0.25)                                         | <1 <sup>c</sup>                    |

<sup>a</sup> Conversion of **4** into ester **5**, as determined by <sup>1</sup>H NMR (characteristic signals of aromatic CH protons from **4** at  $\delta$  7.90 ppm and aromatic CH protons from **5** at  $\delta$  7.61 ppm were integrated). <sup>b</sup> Anhydride **1a** was formed in 70% yield. <sup>c</sup> Starting materials are left and anhydride **1a** was formed in 30% yield.

Characteristic signals of ester **5** in <sup>1</sup>H NMR (CD<sub>3</sub>OD, 400 MHz):  $\delta$  8.05 (d,  $J = 8.3$  Hz, 2H), 7.95 (d,  $J = 8.3$  Hz, 2H), 7.66 (d,  $J = 2.3$  Hz, 1H), 7.61 (d,  $J = 8.3$  Hz, 2H), 7.52–7.46 (m, 4H), 5.45 (s, 2H), 4.69 (s, 2H), 2.40 (s, 3H). <sup>13</sup>C NMR (CD<sub>3</sub>OD, 100.6 MHz):  $\delta$  168.39, 167.60, 148.90, 141.82, 139.37, 139.35, 135.92, 133.49, 130.73, 129.97, 129.04, 128.97, 127.70, 124.32, 121.30, 120.41, 66.95, 64.52, 23.16. MS calcd. for C<sub>23</sub>H<sub>21</sub>BrNO<sub>4</sub><sup>+</sup> [M+H]<sup>+</sup> 454.1, found  $m/z$  454.0.



## 2. General procedure and characterization of products

**General procedure.** A hydroxy acid (1 equiv.), amine (1 equiv.), EDC·HCl (1 equiv.) and EtOAc as a LAG additive ( $\eta = 0.25 \mu\text{L} \cdot \text{mg}^{-1}$ ) were placed into a 14 mL ZrO<sub>2</sub>-coated jar charged with a single 10 mm ZrO<sub>2</sub> milling ball. The jar was then set to mill at 30 Hz for 60 minutes.

**Work-up procedure I:** water (10 mL) was added to the crude reaction mixture, followed by transferring to a glass filter and washing with water (3×10 mL). The obtained solid product was dried in air. If required, further purification by silica gel chromatography (petroleum ether/acetone) was performed.

**Work-up procedure II:** the crude reaction mixture was mixed with water (15 mL) and extracted with ethyl acetate (3×15 mL). The combine organic layers were washed with 10% aq. NaHSO<sub>4</sub> (5 mL), sat. NaHCO<sub>3</sub> (5 mL), brine (10 mL), and dried over Na<sub>2</sub>SO<sub>4</sub>, then filtered, and concentrated under reduced pressure. If required, further purification by silica gel chromatography (petroleum ether/acetone) was performed.

**N-(4-bromo-3-methylphenyl)-4-(hydroxymethyl)benzamide (4).** Prepared from **1** (100 mg, 0.657 mmol), amine **3** (122 mg, 0.657 mmol, 1 equiv.), EDC·HCl (126 mg, 0.657 mmol, 1 equiv.) and EtOAc (87  $\mu\text{L}$ ). Work-up procedure I. Obtained as white solid (187 mg, 89%). Analytically pure sample was prepared by recrystallization (petroleum ether/ethyl acetate = 1:1). mp = 156–157 °C. <sup>1</sup>H NMR (CD<sub>3</sub>OD, 400 MHz):  $\delta$  7.90 (d,  $J = 8.4$  Hz, 2H), 7.65 (d,  $J = 2.2$  Hz, 1H), 7.54–7.42 (m, 4H), 4.69 (s, 2H), 2.39 (s, 3H). <sup>13</sup>C NMR (CD<sub>3</sub>OD, 100.6 MHz):  $\delta$  168.61, 147.18, 139.39, 139.30, 134.84, 133.45, 128.73, 127.74, 124.34, 121.31, 120.34, 64.56, 23.16. HRMS (AJS-ESI) calcd. for C<sub>15</sub>H<sub>15</sub>BrNO<sub>2</sub><sup>+</sup> [M+H]<sup>+</sup> 320.0281, found  $m/z$  320.0276.

**Ethyl 4-(4-(hydroxymethyl)benzamido)benzoate (6).** Prepared from **1** (100 mg, 0.657 mmol), ethyl 4-aminobenzoate (109 mg, 0.657 mmol, 1 equiv.), EDC·HCl (126 mg, 0.657 mmol, 1 equiv.) and EtOAc (84  $\mu\text{L}$ ) in 76% yield by <sup>1</sup>H NMR. Characteristic signals of amide **6** in <sup>1</sup>H NMR (CD<sub>3</sub>OD, 400 MHz):  $\delta$  8.01 (d,  $J = 8.8$  Hz, 2H), 7.93 (d,  $J = 8.4$  Hz, 2H), 7.85 (d,  $J = 8.8$  Hz, 2H), 7.51 (d,  $J = 8.4$  Hz, 2H), 4.70 (s, 2H), 4.36 (q,  $J = 7.1$  Hz, 2H), 1.39 (t,  $J = 7.1$  Hz, 3H). HRMS (AJS-ESI) calcd. for C<sub>17</sub>H<sub>18</sub>NO<sub>4</sub><sup>+</sup> [M+H]<sup>+</sup> 300.1230, found  $m/z$  300.1233.

**4-(Hydroxymethyl)-N-mesitylbenzamide (7).** Prepared from **1** (100 mg, 0.657 mmol), 2,4,6-trimethylaniline (89 mg, 0.657 mmol, 1 equiv.), EDC·HCl (126 mg, 0.657 mmol, 1 equiv.) and EtOAc (60  $\mu\text{L}$ ) in 77% yield by <sup>1</sup>H NMR. Work-up procedure II. Purified by silica gel chromatography with petroleum ether/acetone (25 to 30%) as eluent and obtained as white solid (136 mg, 77%). Analytically pure sample was prepared by recrystallization (petroleum ether/ethyl acetate = 1:2). mp = 157–158 °C. <sup>1</sup>H NMR (CD<sub>3</sub>OD, 400 MHz):  $\delta$  7.96 (d,  $J = 8.3$  Hz, 2H), 7.50 (d,  $J = 8.3$  Hz, 2H), 6.95 (s, 2H), 4.70 (s, 2H), 3.35 (s, 1H), 2.29 (s, 3H), 2.21 (s, 6H). <sup>13</sup>C NMR (CD<sub>3</sub>OD, 100.6 MHz):  $\delta$  169.09, 147.10, 138.17, 136.84, 134.34, 133.15, 129.75, 128.70, 127.80, 64.59, 21.05, 18.32. HRMS (AJS-ESI) calcd. for C<sub>17</sub>H<sub>20</sub>NO<sub>2</sub><sup>+</sup> [M+H]<sup>+</sup> 270.1489, found  $m/z$  270.1491.



***tert*-Butyl 4-(4-(hydroxymethyl)benzoyl)piperazine-1-carboxylate (8).** Prepared from **1** (100 mg, 0.657 mmol), *N*-Boc piperazine (122 mg, 0.657 mmol, 1 equiv.), EDC·HCl (126 mg, 0.657 mmol, 1 equiv.) and EtOAc (87  $\mu$ L). Work-up procedure II. Obtained as white solid (191 mg, 91%). <sup>1</sup>H NMR (CD<sub>3</sub>OD, 400 MHz):  $\delta$  7.50–7.44 (m, 2H), 7.44–7.38 (m, 2H), 4.65 (s, 2H), 3.83–3.34 (m, 8H), 1.47 (s, 9H). <sup>13</sup>C NMR (CD<sub>3</sub>OD, 100.6 MHz):  $\delta$  172.75, 156.24, 145.37, 135.29, 128.26, 127.97, 81.70, 64.59, 48.67 (br., HSQC, 2C), 44.72 (br., HSQC), 43.27 (br., HSQC), 28.59. HRMS (AJS-ESI) calcd. for C<sub>17</sub>H<sub>25</sub>N<sub>2</sub>O<sub>4</sub><sup>+</sup> [M+H]<sup>+</sup> 321.1809, found *m/z* 321.1809. Spectral data are in agreement with previously reported.<sup>6</sup>

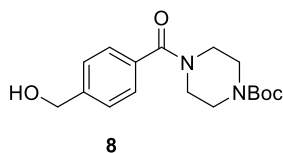

***N*-(4-(hydroxymethyl)benzyl)benzamide (9).** Prepared from benzoic acid (100 mg, 0.819 mmol), (4-(aminomethyl)phenyl)methanol (112 mg, 0.819 mmol, 1 equiv.), EDC·HCl (157 mg, 0.819 mmol, 1 equiv.) and EtOAc (92  $\mu$ L). Work-up procedure II. Obtained as yellowish oil, which crystallizes upon standing (191 mg, 91%). Following work-up procedure I, amide **9** was obtained in 61% yield (120 mg). <sup>1</sup>H NMR (CD<sub>3</sub>OD, 400 MHz):  $\delta$  7.87–7.82 (m, 2H), 7.56–7.50 (m, 1H), 7.49–7.43 (m, 2H), 7.37–7.29 (m, 4H), 4.58 (s, 2H), 4.57 (s, 2H). <sup>13</sup>C NMR (CD<sub>3</sub>OD, 100.6 MHz):  $\delta$  170.15, 141.66, 139.27, 135.65, 132.71, 129.59, 128.56, 128.32, 128.23, 64.96, 44.27. HRMS (AJS-ESI) calcd. for C<sub>15</sub>H<sub>16</sub>NO<sub>2</sub><sup>+</sup> [M+H]<sup>+</sup> 242.1176, found *m/z* 242.1175. Spectral data are in agreement with previously reported.<sup>7</sup>

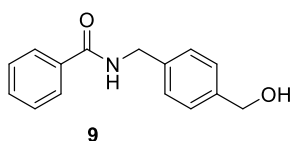

***tert*-Butyl (S)-(1-((4-bromo-3-methylphenyl) amino)-3-hydroxy-1-oxopropan-2-yl) carbamate (10).** Prepared from (*tert*-butoxycarbonyl)-L-serine (100 mg, 0.487 mmol), amine **3** (91 mg, 0.487 mmol, 1 equiv.), EDC·HCl (94 mg, 0.487 mmol, 1 equiv.) and EtOAc (71  $\mu$ L). Work-up procedure II. Purified by silica gel chromatography with petroleum ether/acetone (15 to 20%) as eluent and obtained as colourless oil, which crystallizes upon standing (150 mg, 82%). mp = 133–134 °C. <sup>1</sup>H NMR (CD<sub>3</sub>OD, 400 MHz):  $\delta$  7.53 (d, *J* = 2.6 Hz, 1H), 7.44 (d, *J* = 8.6 Hz, 1H), 7.34 (dd, *J* = 8.6, 2.6 Hz, 1H), 4.25 (t, *J* = 5.4 Hz, 1H), 3.80 (d, *J* = 5.4 Hz, 2H), 2.35 (s, 3H), 1.46 (s, 9H). <sup>13</sup>C NMR (CD<sub>3</sub>OD, 100.6 MHz):  $\delta$  171.55, 157.79, 139.29, 138.94, 133.43, 123.59, 120.56, 120.11, 80.90, 63.36, 58.58, 28.66, 23.12. HRMS (AJS-ESI) calcd. for C<sub>15</sub>H<sub>21</sub>BrN<sub>2</sub>O<sub>4</sub>Na<sup>+</sup> [M+Na]<sup>+</sup> 395.0577, found *m/z* 395.0573.

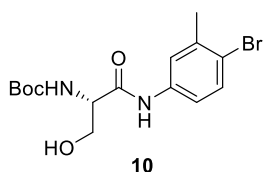

**Methyl (tert-butoxycarbonyl)-L-seryl-L-phenylalaninate (11).** Prepared from (*tert*-butoxycarbonyl)-L-serine (100 mg, 0.487 mmol, 1 equiv.), methyl L-phenylalaninate (87 mg, 0.487 mmol, 1 equiv.), EDC·HCl (94 mg, 0.487 mmol, 1 equiv.) and EtOAc (70  $\mu$ L). Work-up procedure II. Obtained as colourless oil, which could crystallize upon standing (150 mg, 84%). <sup>1</sup>H NMR (CDCl<sub>3</sub>, 400 MHz):  $\delta$  7.32–7.22 (m, 3H), 7.15–7.10 (m, 2H), 7.02 (d, *J* = 6.0 Hz, 1H), 5.48 (d, *J* = 6.5 Hz, 1H), 4.85 (q, *J* = 6.9 Hz, 1H), 4.20–4.08 (m, 1H), 3.99 (d, *J* = 9.7 Hz, 1H), 3.73 (s, 3H), 3.60 (dd, *J* = 11.3, 5.5 Hz, 1H), 3.18 (dd, *J* = 13.9, 5.6 Hz, 1H), 3.05 (dd, *J* = 14.0, 6.9 Hz, 1H), 1.44 (s, 9H). <sup>13</sup>C NMR (CDCl<sub>3</sub>, 100.6 MHz):  $\delta$  171.97, 171.19, 156.04, 135.83, 129.31, 128.77, 127.35, 80.60, 63.04, 55.11, 53.52, 52.64, 37.83, 28.39. HRMS (AJS-ESI) calcd. for C<sub>18</sub>H<sub>27</sub>N<sub>2</sub>O<sub>6</sub><sup>+</sup> [M+H]<sup>+</sup> 367.1864, found *m/z* 367.1865. Spectral data are in agreement with previously reported.<sup>8</sup>

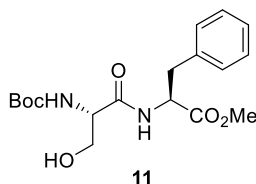



***tert*-Butyl (S)-((4-bromo-3-methylphenyl) amino)-3-(4-hydroxyphenyl)-1-oxopropan-2-yl) carbamate (12).**

Prepared from (*tert*-butoxycarbonyl)-L-tyrosine (100 mg, 0.355 mmol), amine **3** (66 mg, 0.355 mmol, 1 equiv.), EDC·HCl (68 mg, 0.355 mmol, 1 equiv.) and EtOAc (59  $\mu$ L). Work-up procedure I. Purified by silica gel chromatography with petroleum ether/acetone (20 to 25%) as eluent and obtained as white solid (144 mg, 90%). mp = 169–170  $^{\circ}$ C.  $^1$ H NMR ( $\text{CD}_3\text{OD}$ , 400 MHz):  $\delta$  7.47–7.36 (m, 2H), 7.23 (d,  $J$  = 8.7 Hz, 1H), 7.06 (d,  $J$  = 8.4 Hz, 2H), 6.69 (d,  $J$  = 8.4 Hz, 2H), 4.33 (t,  $J$  = 7.4 Hz, 1H), 2.99 (dd,  $J$  = 13.6, 6.8 Hz, 1H), 2.84 (dd,  $J$  = 13.6, 8.0 Hz, 1H), 2.33 (s, 3H), 1.40 (s, 9H).  $^{13}\text{C}$  NMR ( $\text{CD}_3\text{OD}$ , 100.6 MHz):  $\delta$  172.94, 157.63, 157.31, 139.25, 138.79, 133.39, 131.40, 128.87, 123.66, 120.63, 120.15, 116.20, 80.68, 58.34, 38.86, 28.67, 23.11. HRMS (AJS-ESI) calcd. for  $\text{C}_{21}\text{H}_{26}\text{BrN}_2\text{O}_4^+$   $[\text{M}+\text{H}]^+$  449.1070, found  $m/z$  449.1068.

**Methyl (*tert*-butoxycarbonyl)-L-tyrosyl-L-phenylalaninate (13).**

Prepared from (*tert*-butoxycarbonyl)-L-tyrosine (100 mg, 0.355 mmol), methyl L-phenylalaninate (64 mg, 0.355 mmol, 1 equiv.), EDC·HCl (68 mg, 0.355 mmol, 1 equiv.) and EtOAc (58  $\mu$ L). Work-up procedure I. Obtained as white solid (130 mg, 83%). mp = 139–140  $^{\circ}$ C; lit. mp = 140–141  $^{\circ}$ C.<sup>9</sup> Mixture of (*S,S*)- and (*S,R*)-**13** diastereomers was obtained analogously from methyl D,L-phenylalaninate.  $^1\text{H}$  NMR ( $\text{CDCl}_3$ , 400 MHz):  $\delta$  7.26–7.20 (m, 3H), 7.05–6.95 (m, 4H), 6.74–6.69 (m, 2H), 6.25 (d,  $J$  = 4.87 Hz, 1H), 4.98 (s, 1H), 4.77 (d,  $J$  = 7.2 Hz, 1H), 4.26 (s, 1H), 3.66 (s, 3H), 3.11–2.99 (m, 2H), 2.94 (d,  $J$  = 6.8 Hz, 1H), 1.41 (s, 9H).  $^{13}\text{C}$  NMR ( $\text{CDCl}_3$ , 100.6 MHz):  $\delta$  171.54, 171.22, 155.57, 155.30, 135.70, 130.56, 129.37, 128.71, 128.03, 127.29, 115.73, 80.56, 56.07, 53.45, 52.47, 38.10, 37.67, 28.39. HRMS (AJS-ESI) calcd. for  $\text{C}_{24}\text{H}_{31}\text{N}_2\text{O}_6^+$   $[\text{M}+\text{H}]^+$  443.2177, found  $m/z$  443.2175. The diastereomeric purity (99:1 dr) was confirmed by characteristic resonances in  $^1\text{H}$  NMR: (*S,S*)-diastereomer, 8.27 ppm; (*S,R*)-diastereomer, 8.39 ppm (see a fragment of  $^1\text{H}$  NMR spectra in  $\text{DMSO}-d_6$ ). Spectral data are in agreement with previously reported.<sup>10</sup>

**(4*R*)-N-(3-bromo-4-methylphenyl)-4-((3*R*, 5*R*, 10*S*, 13*R*, 17*R*)-3-hydroxy-10, 13-dimethylhexadecahydro-1*H*-cyclopenta [a] phenanthren-17-yl) pentanamide (14).**

Prepared from lithocholic acid (100 mg, 0.266 mmol), amine **3** (49 mg, 0.266 mmol, 1 equiv.), EDC·HCl (51 mg, 0.266 mmol, 1 equiv.) and EtOAc (50  $\mu$ L). Work-up procedure I. Obtained as white solid (134 mg, 93%). Analytically pure sample was prepared by recrystallization (dichloromethane/methanol = 3:1). mp = 240–241  $^{\circ}$ C.  $^1\text{H}$  NMR ( $\text{DMSO}-d_6$ , 400 MHz):  $\delta$  9.90 (s, 1H), 7.58 (d,  $J$  = 2.5 Hz, 1H), 7.46 (d,  $J$  = 8.7 Hz, 1H), 7.36 (dd,  $J$  = 8.7, 2.5 Hz, 1H), 4.44 (d,  $J$  = 4.5 Hz, 1H), 3.43–3.33 (m, 1H), 2.37–2.26 (m, 1H), 2.29 (s, 3H), 2.24–2.15 (m, 1H), 1.93 (d,  $J$  = 8.8 Hz, 1H), 1.86–1.46 (m, 7H), 1.41–0.99



(m, 17H), 0.91 (d,  $J = 6.5$  Hz, 3H), 0.94–0.88 (m, 1H), 0.87 (s, 3H), 0.61 (s, 3H).  $^{13}\text{C}$  NMR (DMSO- $d_6$ , 100.6 MHz):  $\delta$  171.77, 138.89, 137.27, 132.12, 121.29, 118.47, 116.94, 69.85, 56.09, 55.55, 42.27, 41.51, 39.97, 39.70, 36.30, 35.37, 35.14, 34.95, 34.20, 33.35, 31.23, 30.38, 27.73, 26.88, 26.16, 23.85, 23.27, 22.66, 20.40, 18.31, 11.88. HRMS (AJS-ESI) calcd. for  $\text{C}_{31}\text{H}_{47}\text{BrNO}_2^+$   $[\text{M}+\text{H}]^+$  544.2785, found  $m/z$  544.2785.



### 3. Preparation of intermediate 18: optimization studies

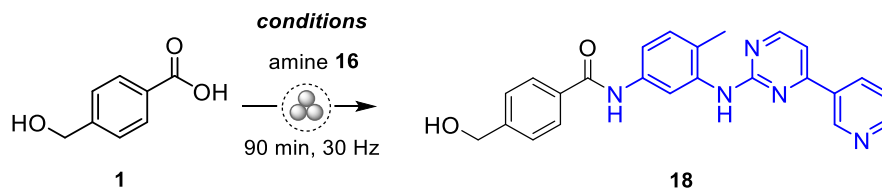

*Reaction condition for the optimization studies:* Acid **1** (54.9 mg, 0.36 mmol), amine **16** (100.0 mg, 0.36 mmol, 1 equiv.), coupling reagent (0.36–0.40 mmol, 1–1.3 equiv.), base (1.08 mmol, 3 equiv.), triphenylmethane (in entries 5 and 6, Table S2) and LAG additive (0.19–0.25  $\mu\text{L}\cdot\text{mg}^{-1}$ ) were placed into a 14 mL  $\text{ZrO}_2$ -coated jar charged with a single 10 mm  $\text{ZrO}_2$  milling ball. The jar was then set to mill at 30 Hz for 90 minutes.

- A. The resulting crude reaction mixture was transferred to a beaker, diluted with distilled water (10–15 mL), stirred for 2 hours, then filtered through a glass filter and dried under vacuum (Table S2, Entries 1–4).
- B. The resulting crude reaction mixture was analysed by  $^1\text{H}$  NMR in  $\text{DMSO}-d_6$ , after separation of insoluble inorganic material (Table S3, Entries 5 and 6).

**Table S3.** Optimization studies.

| Entry | Coupling reagent  | Base                                | LAG<br>( $\eta$ , $\mu\text{L}\cdot\text{mg}^{-1}$ ) | Yield of <b>18</b> , % |
|-------|-------------------|-------------------------------------|------------------------------------------------------|------------------------|
| 1     | EDC (1 equiv.)    | -                                   | $\text{CH}_3\text{NO}_2$ (0.25)                      | 86                     |
| 2     | EDC (1 equiv.)    | -                                   | Sulfolane (0.25)                                     | 83                     |
| 3     | EDC (1 equiv.)    | -                                   | EtOAc (0.25)                                         | 93                     |
| 4     | COMU (1.1 equiv.) | $\text{K}_2\text{HPO}_4$ (3 equiv.) | EtOAc (0.19)                                         | 81                     |
| 5     | TCFH (1.1 equiv.) | $\text{K}_2\text{HPO}_4$ (3 equiv.) | EtOAc (0.19)                                         | 36 <sup>a</sup>        |
| 6     | TCFH (1.3 equiv.) | NMI (3 equiv.)                      | without                                              | 63 <sup>a</sup>        |

<sup>a</sup> Conversion of **1** into **18**, as determined by  $^1\text{H}$  NMR in  $\text{DMSO}-d_6$  using an internal standard (characteristic signals of triphenylmethane CH proton at  $\delta$  5.61 ppm and  $\text{CH}_2\text{-OH}$  protons from amide **18** at  $\delta$  4.59 ppm were integrated).

#### HPLC-UV-MS analysis of amide 18.

The chromatographic separation was performed on Phenomenex Kinetex XB-C18 column (150 mm  $\times$  4.6 mm, 2.6  $\mu\text{m}$ ). Eluents A (water / 0.1% formic acid) and B (methanol) were used in A:B 60:40 (v/v) isocratic mode for 3 minutes, followed by a 10-minute gradient from A:B 60:40 (v/v) to A:B 30:70 (v/v) and a 17-minute isocratic stage with the flow rate of 0.5 mL/min. The column temperature was set at 30  $^\circ\text{C}$ , injection volume at 1  $\mu\text{L}$  and detection wavelength at 270 nm. The peaks were characterized by ESI-MS with the following spray chamber parameters: drying gas flow 5 L/min, drying gas temperature 300  $^\circ\text{C}$ , nebulizer pressure 60 psig, vaporizer temperature 150  $^\circ\text{C}$ , capillary voltage 2000 V and charging electrode voltage 2000 V. Mass spectra were acquired in positive mode within  $m/z$  100 – 2000 range and fragmentor voltage 100 V.

Sample preparation: ~0.5 mg/ml in acetonitrile: methanol 1:1 (v/v).



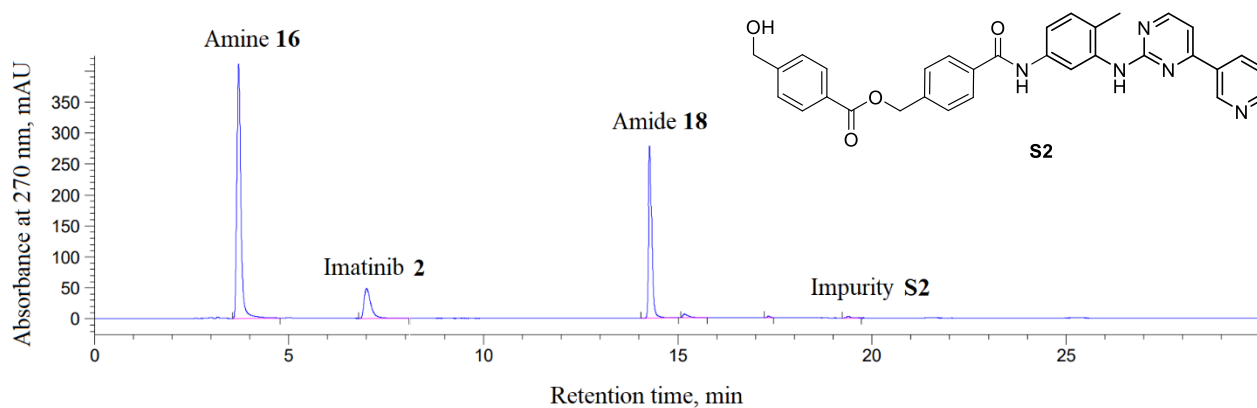

**Figure S1.** HPLC-UV chromatogram of the mixture of amine **16**, imatinib **2**, amide **18** and impurity **S2** at 270 nm.

MS data:

Amine **16**, calcd. for  $C_{16}H_{16}N_5^+$   $[M+H]^+$  278.1, found  $m/z$  278.1.

Imatinib **2**, calcd. for  $C_{29}H_{32}N_7O^+$   $[M+H]^+$  494.3, found  $m/z$  494.2.

Amide **18**, calcd. for  $C_{24}H_{22}N_5O_2^+$   $[M+H]^+$  412.2, found  $m/z$  412.1.

Impurity **S2**, calcd. for  $C_{32}H_{28}N_5O_4^+$   $[M+H]^+$  546.2, found  $m/z$  546.2.

**Table S4.** HPLC purity of amide **18** prepared under different conditions.

| Entry | Coupling reagent / Base                                 | LAG<br>( $\eta$ , $\mu\text{L}\cdot\text{mg}^{-1}$ ) | HPLC area percentage, % |           |           |
|-------|---------------------------------------------------------|------------------------------------------------------|-------------------------|-----------|-----------|
|       |                                                         |                                                      | <b>18</b>               | <b>16</b> | <b>S2</b> |
| 1     | EDC (1 equiv.)                                          | $\text{CH}_3\text{NO}_2$ (0.25)                      | 98.3                    | 1.5       | 0.2       |
| 2     | EDC (1 equiv.)                                          | Sulfolane (0.25)                                     | 97.3                    | 1.3       | 1.3       |
| 3     | EDC (1 equiv.)                                          | EtOAc (0.25)                                         | 98.0                    | 0.9       | 1.1       |
| 4     | COMU (1.1 equiv.) / $\text{K}_2\text{HPO}_4$ (3 equiv.) | EtOAc (0.19)                                         | 94.3                    | 0.2       | 4.8       |

*The final protocol:* Two identical reactions were performed simultaneously in two jars.

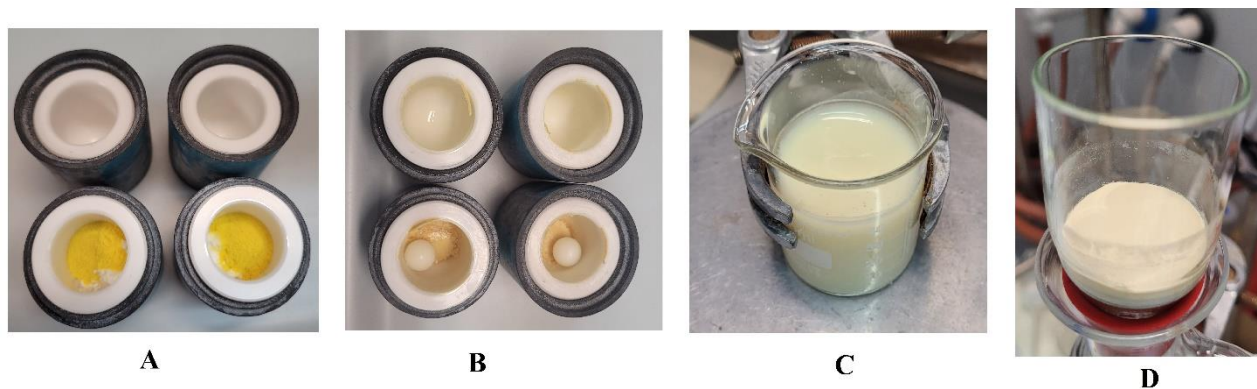

**Figure S2.** Synthesis of amide **18**.



Amine **16** (300 mg, 1.08 mmol), acid **1** (173 mg, 1.14 mmol, 1.05 equiv.), EDC HCl (228 mg, 1.19 mmol, 1.1 equiv.) and EtOAc (350  $\mu$ L) were placed into a 14 mL ZrO<sub>2</sub>-coated jar charged with one 10 mm ZrO<sub>2</sub> ball (Figure S2, A). The second jar was loaded with the same amount of chemicals and the two jars were set to mill at 30 Hz for 90 min. The resulting crude reaction mixtures (yellowish solid, Figure S2, B) were combined and transferred to a beaker, diluted with water (ca. 40 mL), stirred for 2 hours (Figure S2, C), then filtered through a glass filter (Figure S2, D) and dried first in air and then under vacuum. Product **18** was obtained as a yellowish solid (835 mg, 94% yield, 98% HPLC purity, Figure S3). mp = 197–198 °C (CH<sub>3</sub>OH). <sup>1</sup>H NMR (DMSO-*d*<sub>6</sub>, 400 MHz):  $\delta$  10.16 (s, 1H, NH), 9.28 (d, *J* = 2.3 Hz, 1H), 8.98 (s, 1H, NH), 8.68 (dd, *J* = 4.8, 1.7 Hz, 1H), 8.51 (d, *J* = 5.1 Hz, 1H), 8.48 (d, *J* = 8.1 Hz, 1H), 8.10 (d, *J* = 2.3 Hz, 1H), 7.94 (d, *J* = 8.0 Hz, 2H), 7.46 (d, *J* = 8.0 Hz, 2H), 7.56–7.39 (m, 3H), 7.21 (d, *J* = 8.3 Hz, 1H), 5.35 (t, *J* = 5.7 Hz, 1H, OH), 4.59 (d, *J* = 5.7 Hz, 2H), 2.23 (s, 3H). <sup>13</sup>C NMR (DMSO-*d*<sub>6</sub>, 100.6 MHz):  $\delta$  165.23, 161.62, 161.20, 159.49, 151.40, 148.22, 146.27, 137.80, 137.23, 134.43, 133.35, 132.23, 130.04, 127.57, 127.52, 126.05, 123.79, 117.23, 116.76, 107.52, 62.48, 17.67. HRMS (AJS-ESI) calcd. for C<sub>24</sub>H<sub>22</sub>N<sub>5</sub>O<sub>2</sub><sup>+</sup> [M+H]<sup>+</sup> 412.1768, found *m/z* 412.1766.

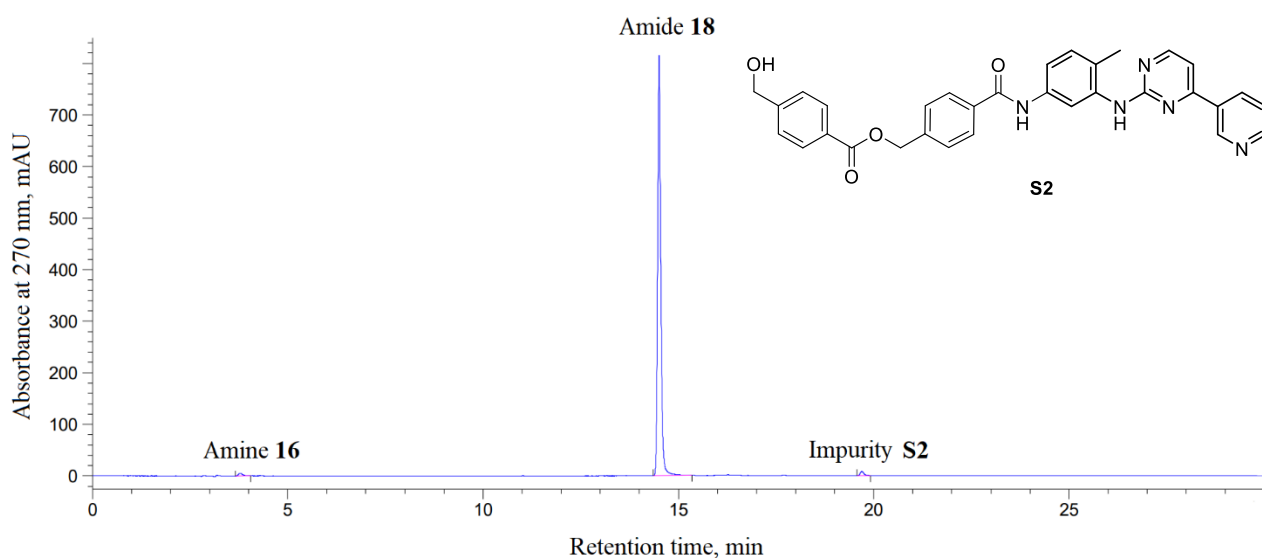

**Figure S3.** HPLC-UV chromatogram of amide **18** (98.0%), containing amine **16** (0.9%) and impurity **S2** (1.1%).

*The confirmation of the structure of impurity S2 by synthesis and alkaline hydrolysis*

Amide **18** (50.0 mg, 0.12 mmol), acid **1** (19 mg, 0.12 mmol, 1 equiv.), TCFH (38 mg, 0.13 mmol, 1.1 equiv.), NMI (30 mg, 0.36 mmol, 3 equiv.) were placed into a 14 mL ZrO<sub>2</sub>-coated jar charged with a single 10 mm ZrO<sub>2</sub> milling ball. The jar was then set to mill at 30 Hz for 60 minutes. The resulting crude reaction mixture was transferred to a beaker, diluted with distilled water (5 mL), stirred for 2 hours, then filtered through a glass filter, dried under vacuum and analysed by HPLC (Figure S4) that shows generation of **S2** and unreacted **18**. Characteristic signals of benzylic CH<sub>2</sub>OC(O) of **S2** in <sup>1</sup>H and <sup>13</sup>C NMR (DMSO-*d*<sub>6</sub>):  $\delta_{\text{H}}$  = 5.44 ppm,  $\delta_{\text{C}}$  = 65.4 ppm. The treatment of amide **18**, containing 1.1% of **S2**, with 1M aq. NaOH at 40°C for 2 hours (in methanol) resulted in the hydrolysis of ester **S2** and its disappearance from the HPLC chromatogram (Figure S5).



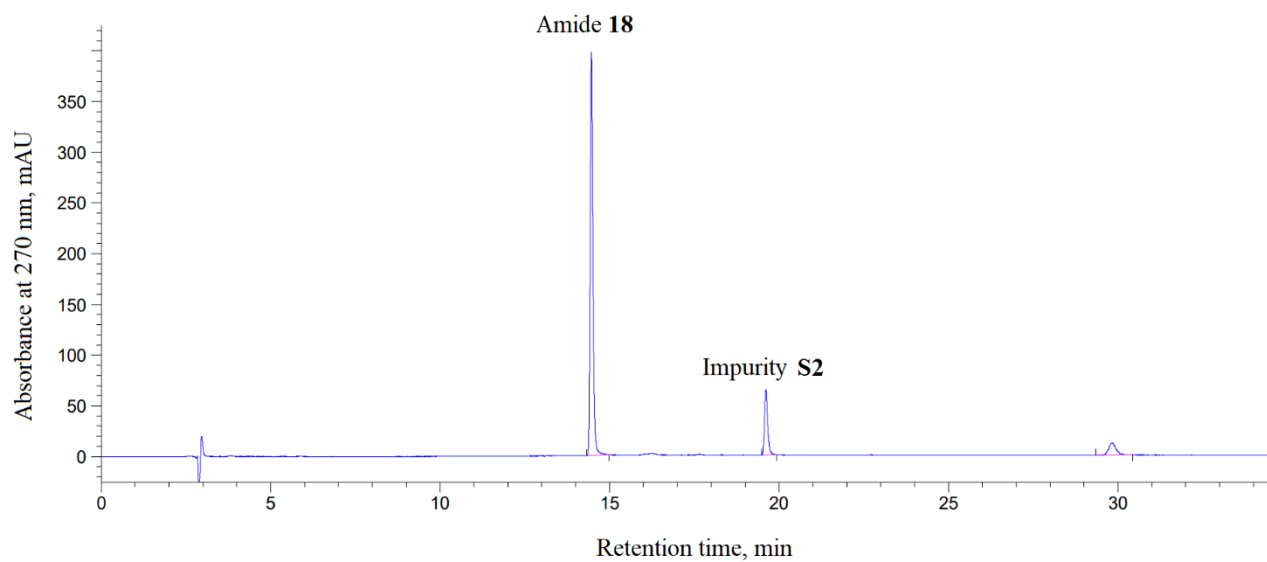

**Figure S4.** HPLC-UV chromatogram of amide **18**, containing impurity **S2**.

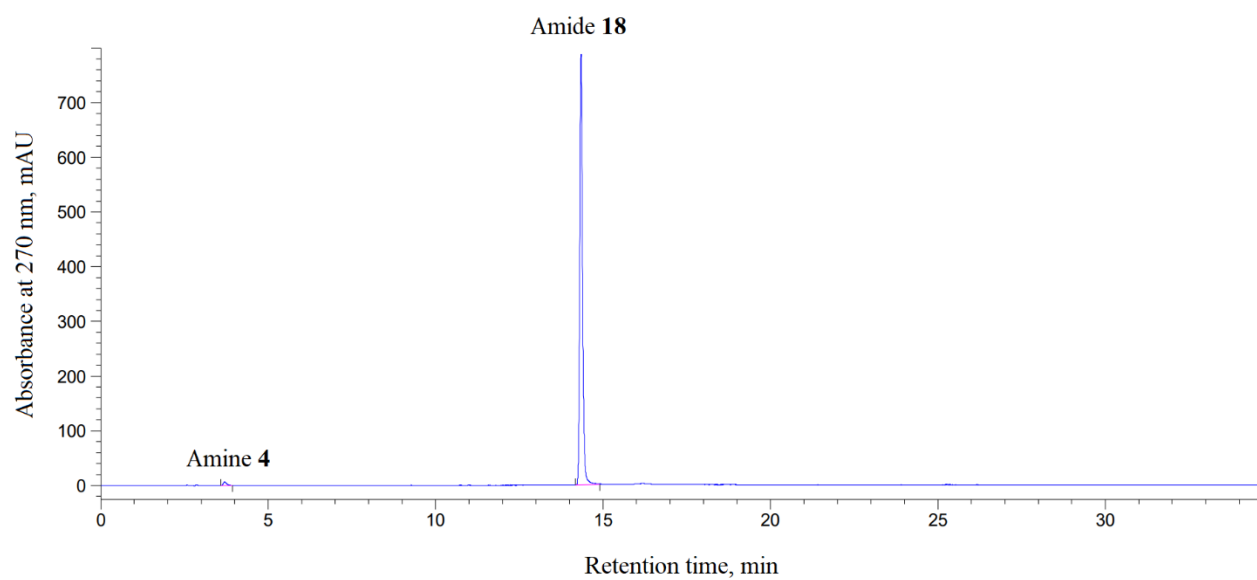

**Figure S5.** HPLC-UV chromatogram of amide **18** after hydrolysis with 1M NaOH solution.



## 4. Preparation of Imatinib 2 from amide 18: optimization studies.

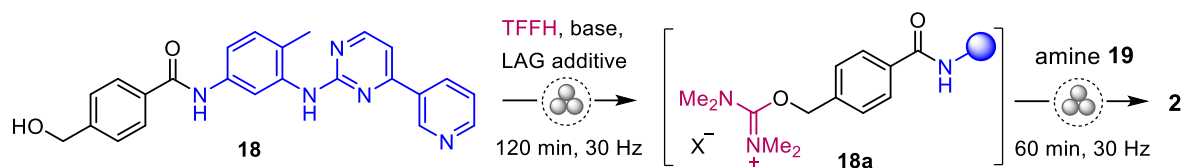

*Reaction condition for the optimization studies:* Amide **18** (100 mg, 0.24 mmol), TFFH (0.49 mmol, 2 equiv.) and a base (0.49–0.61 mmol, 2–2.5 equiv.) were placed into a 14 mL ZrO<sub>2</sub>-coated jar charged with a single 10 mm ZrO<sub>2</sub> milling ball. Then LAG additive was added to the jar ( $\eta = 0.2\text{--}0.75\text{ }\mu\text{L}\cdot\text{mg}^{-1}$ ), which was then set to mill at 30 Hz for 120 min. 1-Methylpiperazine **7** (0.36–2.43 mmol, 1.5–10 equiv.) was added to the resulting mixture, and the jar was set to mill at 30 Hz for additional 60 min. The resulting crude reaction mixture was transferred to a beaker, diluted with cold distilled water (20–30 mL), stirred overnight, then filtered through a glass filter, dried in air and analysed by HPLC-UV-MS (Table S5).

**Table S5.** Optimization studies.

| Entry                 | Base (equiv.)                                                | LAG<br>( $\eta$ , $\mu\text{L}\cdot\text{mg}^{-1}$ ) | Amine <b>7</b> | HPLC area percentage, % |           |           |           |
|-----------------------|--------------------------------------------------------------|------------------------------------------------------|----------------|-------------------------|-----------|-----------|-----------|
|                       |                                                              |                                                      |                | <b>2</b>                | <b>18</b> | <b>20</b> | <b>21</b> |
| <b>1<sup>6</sup></b>  | K <sub>2</sub> HPO <sub>4</sub><br>(2.0 equiv.)              | EtOAc (0.2)                                          | 1.5 equiv.     | 66 <sup>a</sup>         | -         | -         | -         |
| <b>2</b>              | K <sub>2</sub> HPO <sub>4</sub><br>(2.5 equiv.)              | Sulfolane (0.5)                                      | 2.5 equiv.     | 74.6                    | 8.1       | 13.5      | -         |
| <b>3</b>              | K <sub>2</sub> HPO <sub>4</sub><br>(2.5 equiv.)              | EtOAc (0.5)                                          | 5.0 equiv.     | 89.1                    | 6.5       | 2.9       | 0.5       |
| <b>4</b>              | K <sub>2</sub> HPO <sub>4</sub><br>(2.5 equiv.)              | Sulfolane (0.5)                                      | 5.0 equiv.     | 91.8                    | 1.9       | 5.5       | 0.8       |
| <b>5</b>              | K <sub>4</sub> P <sub>2</sub> O <sub>7</sub><br>(2.0 equiv.) | DMI (0.6)                                            | 5.0 equiv.     | 94.2                    | 0.9       | 3.8       | 1.1       |
| <b>6</b>              | K <sub>4</sub> P <sub>2</sub> O <sub>7</sub><br>(2.0 equiv.) | EtOAc (0.5)                                          | 5.0 equiv.     | 84.9                    | 13.7      | 0.7       | 0.7       |
| <b>7</b>              | K <sub>2</sub> HPO <sub>4</sub><br>(2.5 equiv.)              | DMI (0.65)                                           | 5.0 equiv.     | 93.2                    | 0.6       | 5.2       | 1.0       |
| <b>8</b>              | K <sub>4</sub> P <sub>2</sub> O <sub>7</sub><br>(2.0 equiv.) | DMI (0.6)                                            | 10.0 equiv.    | 94.9                    | 0.4       | 3.2       | 1.5       |
| <b>9</b>              | K <sub>2</sub> HPO <sub>4</sub><br>(2.5 equiv.)              | DMI (0.65)                                           | 10.0 equiv.    | <b>95.6</b>             | 0.6       | 2.4       | 1.5       |
| <b>10<sup>b</sup></b> | K <sub>2</sub> HPO <sub>4</sub><br>(2.5 equiv.)              | DMI (0.65)                                           | 10.0 equiv.    | <b>95.3</b>             | 1.3       | 2.0       | 1.4       |

<sup>a</sup> With 1.5 equiv. of TFFH, conversion of amide **18** into product **2**, as determined by <sup>1</sup>H NMR in DMSO-*d*<sub>6</sub> (characteristic signals of NH proton from amide **18** at  $\delta$  10.15 ppm and from product **2** at  $\delta$  10.16 ppm were integrated). <sup>b</sup> The reaction was performed starting from 300 mg of **18** in a 14 mL ZrO<sub>2</sub>-coated jar charged with two 10 mm ZrO<sub>2</sub> milling balls.



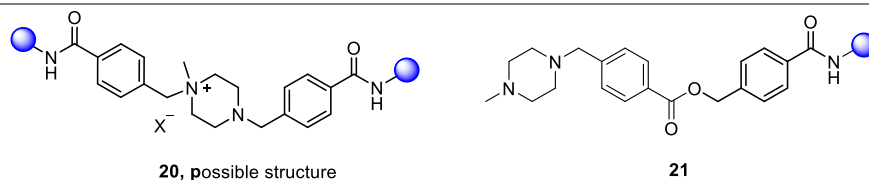

**20**, MS calcd. for  $C_{53}H_{51}N_{12}O_2^+$   $[M]^+$  887.4, found  $m/z$  887.4.

**21**, MS calcd. for  $C_{37}H_{38}N_7O_3^+$   $[M+H]^+$  628.3, found  $m/z$  628.3.

*The final protocol:* Two identical reactions were performed simultaneously in two jars.

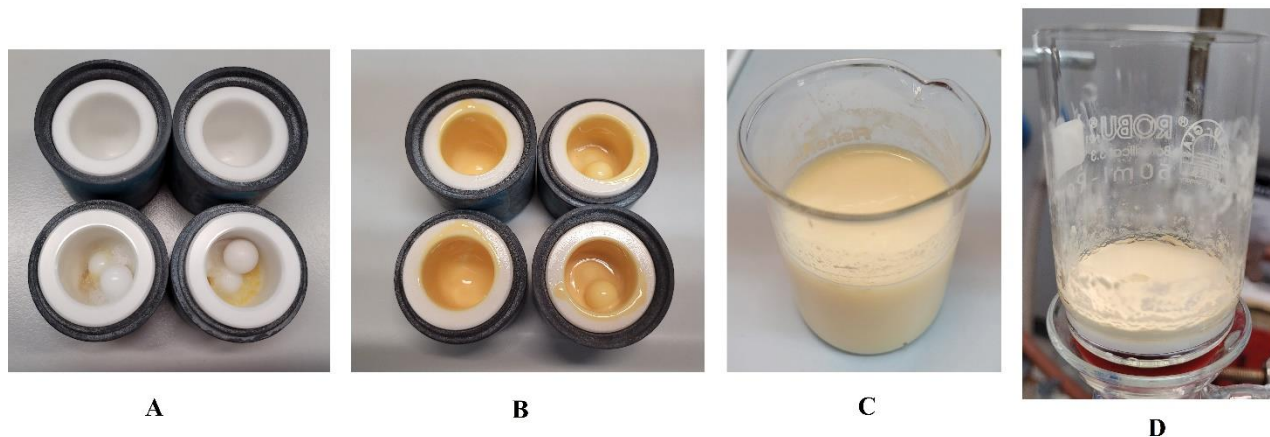

**Figure S6.** Preparation of Imatinib **2** from intermediate **18**.

Amide **18** (300 mg, 0.73 mmol, 98% purity, crude material obtained in the previous step and used without any additional purification), TFFH (385 mg, 1.46 mmol, 2 equiv.) and  $K_2HPO_4$  (318 mg, 1.82 mmol, 2.5 equiv.) were placed into a 14 mL  $ZrO_2$ -coated jar charged with two 10 mm  $ZrO_2$  milling balls. Dimethyl isosorbide was added (655  $\mu$ L) as a LAG additive. The second jar was loaded with the same amount of chemicals (Figure S6, A) and the two jars were set to mill at 30 Hz for 120 minutes. Then 1-methylpiperazine **7** (810  $\mu$ L, 7.30 mmol, 10 equiv.) was added to each jar to the formed reaction mixture. The two jars were set to mill at 30 Hz for additional 60 minutes. The resulting crude reaction mixtures (yellowish viscous paste, Figure S6, B) were combined and transferred to a beaker, diluted with distilled water (100 mL), stirred overnight (Figure S6, C), then filtered through a glass filter (Figure S6, D), dried first in air and then under vacuum. Imatinib **2** was obtained as off-white solid (690 mg, 96% yield, 95% HPLC purity, Figure S7). Analytically pure sample was obtained by crystallization from methanol/ethyl acetate (1:1) to give Imatinib **2** with 99% HPLC purity (Figure S8).  $^1H$  NMR (DMSO- $d_6$ , 400 MHz):  $\delta$  10.16 (s, 1H), 9.28 (dd,  $J$  = 2.3, 0.9 Hz, 1H), 8.98 (s, 1H), 8.68 (dd,  $J$  = 4.8, 1.6 Hz, 1H), 8.51 (d,  $J$  = 5.1 Hz, 1H), 8.48 (dt,  $J$  = 8.0, 1.9 Hz, 1H), 8.09 (d,  $J$  = 1.9 Hz, 1H), 7.91 (d,  $J$  = 8.3 Hz, 2H), 7.55-7.46 (m, 2H), 7.45-7.39 (m, 3H), 7.20 (d,  $J$  = 8.4 Hz, 1H), 3.52 (s, 2H), 2.47-2.20 (m, 8H), 2.22 (s, 3H), 2.14 (s, 3H).  $^{13}C$  NMR (DMSO- $d_6$ , 100.6 MHz)  $\delta$  165.25, 161.60, 161.19, 159.47, 151.39, 148.21, 142.11, 137.80, 137.21, 134.42, 133.77, 132.22, 130.03, 128.62, 127.58, 123.78, 117.20, 116.72, 107.51, 61.62, 54.71, 52.58, 45.74, 17.67. HRMS (AJS-ESI) calcd. for  $C_{29}H_{32}N_7O^+$   $[M+H]^+$  494.2663, found  $m/z$  494.2665. Spectral data are in agreement with previously reported.<sup>11</sup>



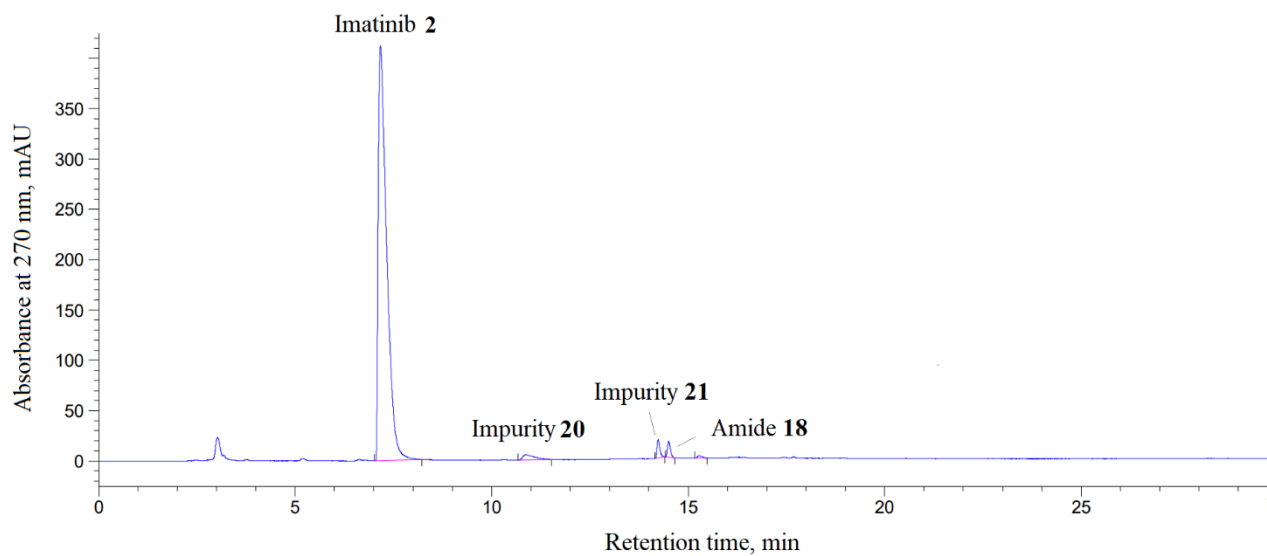

**Figure S7.** HPLC-UV chromatogram of Imatinib **2** (95.3%), containing impurities **20** (1.4%), **21** (2.0%) and amide **18** (1.3%).

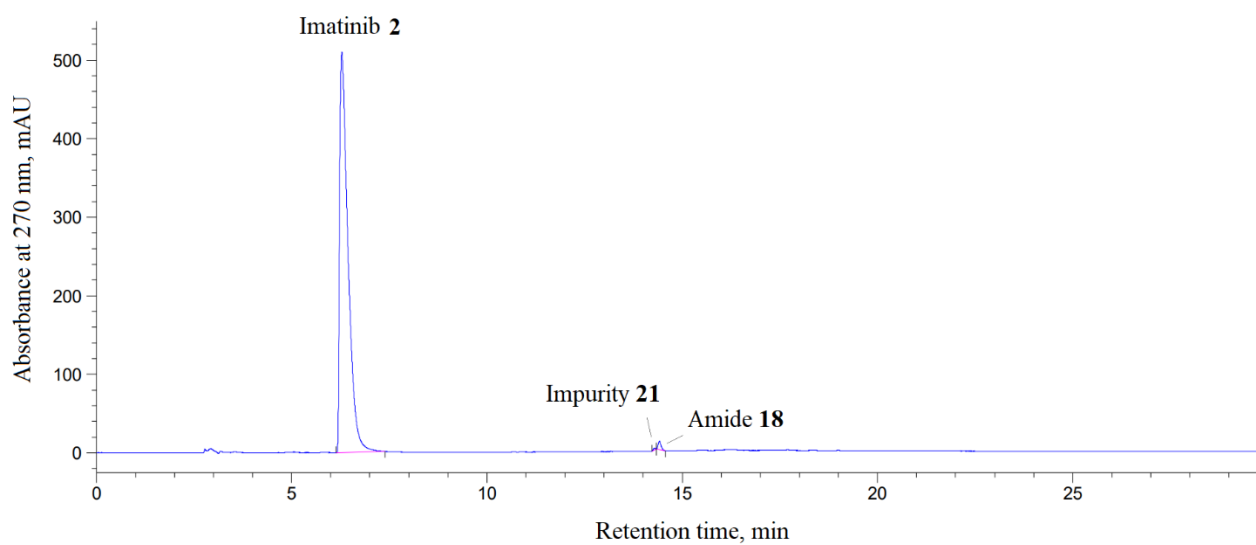

**Figure S8.** HPLC-UV chromatogram of Imatinib **2** (99.2%), containing impurity **21** (0.1%) and amide **18** (0.7%).



## 5. SC-XRD characterization of 18.

Single crystal X-ray diffraction data was collected at 123K on Rigaku Compact HomeLab diffractometer, equipped with a Saturn 944 HG CCD detector and Oxford Cryostream cooling system using monochromatic Cu- $K\alpha$  radiation (1.54178 Å) from a MicroMax<sup>TM</sup>-003 sealed tube microfocus X-ray source. The data was solved by intrinsic phasing (SHELXT)<sup>12</sup> and refined by full-matrix least squares on  $F^2$  using Olex2<sup>13</sup> utilising the SHELXL module.<sup>12</sup> Anisotropic displacement parameters were assigned to non-H atoms and isotropic displacement parameters for all H atoms were constrained to multiples of the equivalent displacement parameters of their parent atoms with  $U_{\text{iso}}(\text{H}) = 1.2 U_{\text{eq}}$  (methylene, methine) or  $U_{\text{iso}}(\text{H}) = 1.5 U_{\text{eq}}$  (methyl, hydroxy) of their respective parent atoms. Appropriate restraints were applied to the geometry and thermal displacement parameters of the atoms involved in the disordered parts of the structures. Restrain DFIX was used to fix the distance between carbon and oxygen atoms (C1A O1A bond distance was fixed to be 1.43) to be equal within the standard uncertainty  $s$  value 0.02. Terminal OH-group was modelled as a 60:40% disorder model.

The crystallographic data is deposited with the Cambridge Crystallographic Data Centre (CCDC 2287665) and can be obtained free of charge from The Cambridge Crystallographic Data Centre via [www.ccdc.cam.ac.uk/data\\_request/cif](http://www.ccdc.cam.ac.uk/data_request/cif).

Single-crystal XRD analysis unambiguously revealed that we obtained a crystal structure of amide **18** with methanol coordinated to it (Figure S9).

### *Crystallographic details for amide 18*

[C<sub>24</sub>H<sub>21</sub>N<sub>5</sub>O<sub>2</sub>] $\cdot$ [C<sub>1</sub>H<sub>4</sub>O<sub>1</sub>]: Single crystals of the compound were obtained from a methanol solution of amide **18** by slow evaporation of the solvent.

C<sub>25</sub>H<sub>25</sub>N<sub>5</sub>O<sub>3</sub>,  $M = 426.71$  g/mol 1, colorless blocks,  $0.06 \times 0.20 \times 0.20$ , monoclinic,  $P2_1/c$ ,  $a = 14.3819(4)$  Å,  $b = 15.9349(5)$  Å,  $c = 9.4755(3)$  Å,  $\alpha = 90^\circ$ ,  $\beta = 99.199(3)^\circ$ ,  $\gamma = 90^\circ$ ,  $V = 2143.61(11)$  Å<sup>3</sup>,  $Z = 4$ , Cu- $K\alpha$  radiation ( $\lambda = 1.54184$  Å), at  $T = 123.0(1)$  K,  $\mu(\text{Cu-}K\alpha) = 0.701$  mm<sup>-1</sup>, 13786 reflections measured ( $6.208^\circ \leq 2\theta \leq 129.382^\circ$ ),  $R_{\text{int}} = 0.028$ , 314 parameters, 1 restraints,  $R_1[F^2 > 2\sigma(F^2)] = 0.061$ ,  $wR_2(\text{all data}) = 0.188$ ,  $S = 1.095$ ,  $0.21 < d\Delta\rho < -0.30$  eÅ<sup>-3</sup>.



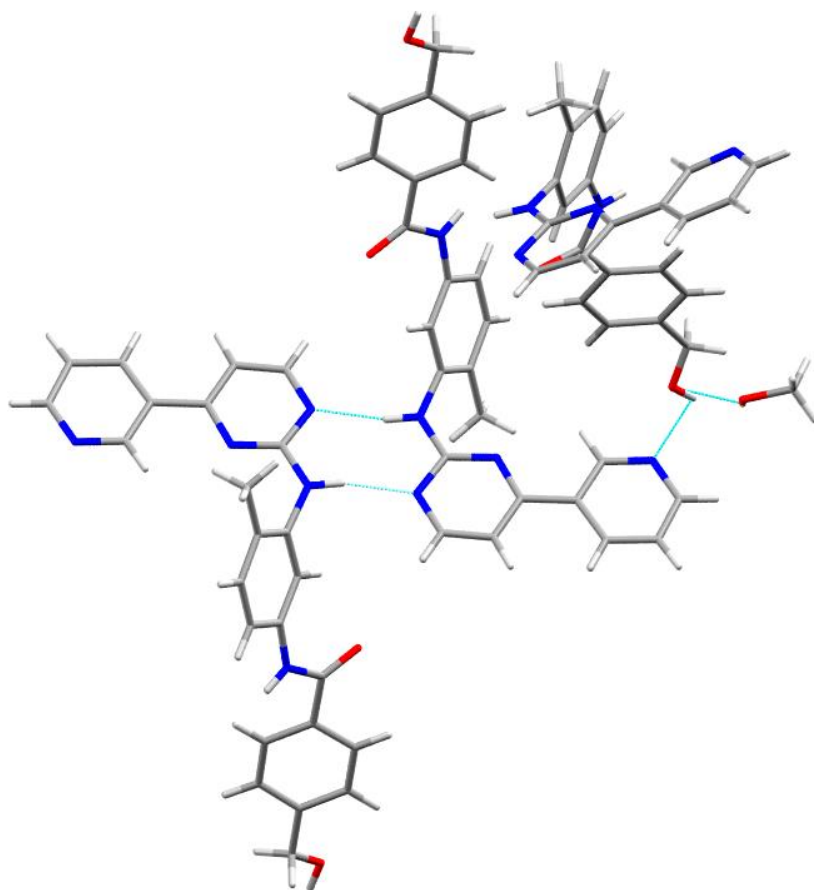

**Figure S9.** Crystal structure of amide **18**.



## 6. Determination of Amine 16 (Impurity F) according to the European Pharmacopoeia and optimization studies for its content reduction.

### 6.1. Quantification of Amine 16.

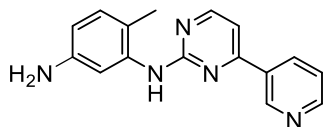

Amine 16 (Impurity F)

Determination of genotoxic impurity **F** (amine **16**) was carried out according to the method established by European Pharmacopoeia 9.2, 07/2017:2736 used in analysis of Imatinib mesylate. The allowed limit is maximum 20 ppm.

Imatinib **2** with 99% HPLC purity was analysed (the synthetic procedure is described in the section 4, p. S14).

*Sample preparation:*

0.5 mg/ml in acetonitrile: methanol 1:1 (v/v).

*Reference solution of impurity F:*

0.00001 mg/ml in acetonitrile: methanol 1:1 (v/v). The concentration of impurity **F** corresponds to 20 ppm in test solution.

*General HPLC-MS conditions:*

The chromatographic separation was performed on Macherey-Nagel RP18 column (150 mm × 3.0 mm, 2.7 μm). Eluents A (1.26 g/L solution of ammonium formate in water adjusted to pH 3.5 with formic acid) and B (0.05% formic acid in acetonitrile) were used in a gradient mode starting with A:B 80:20 (v/v) isocratic stage for 6 minutes, followed by a 4-minute gradient from A:B 80:20 (v/v) to A:B 20:80 (v/v) and holding the latter as 5-minute isocratic stage, with the flow rate of 0.5 mL/min. The column temperature was set at 40 °C and injection volume at 10 μL. Impurity **F** was followed by mass detector operated in single ion monitoring (SIM) mode with the following parameters: ESI, positive polarity, detection  $m/z$  278.2, gas temperature 350 °C, drying gas flow 12 L/min, nebulizer pressure 60 psig, capillary voltage 3000 V. MS acquisition was started at 3.5 min and stopped at 6 min.

The content of impurity **F** ( $X$ , ppm) was calculated via formula (1):

$$X = \frac{S_i \cdot m_0 \cdot A_0 \cdot V_i \cdot 10^6}{S_0 \cdot m_i \cdot V_0 \cdot 100} \quad (1)$$

where  $S_i$  – peak area of impurity **F** on the chromatogram of test solution, ion counts;  $S_0$  – peak area of impurity **F** on the chromatogram of reference solution, ion counts;  $m_i$  – weight of the sample, mg;  $m_0$  – weight of the reference standard, mg;  $A_0$  – reference standard purity or assay, %;  $V_0$  – total volume of reference solution;  $V_i$  – total volume of test solution.



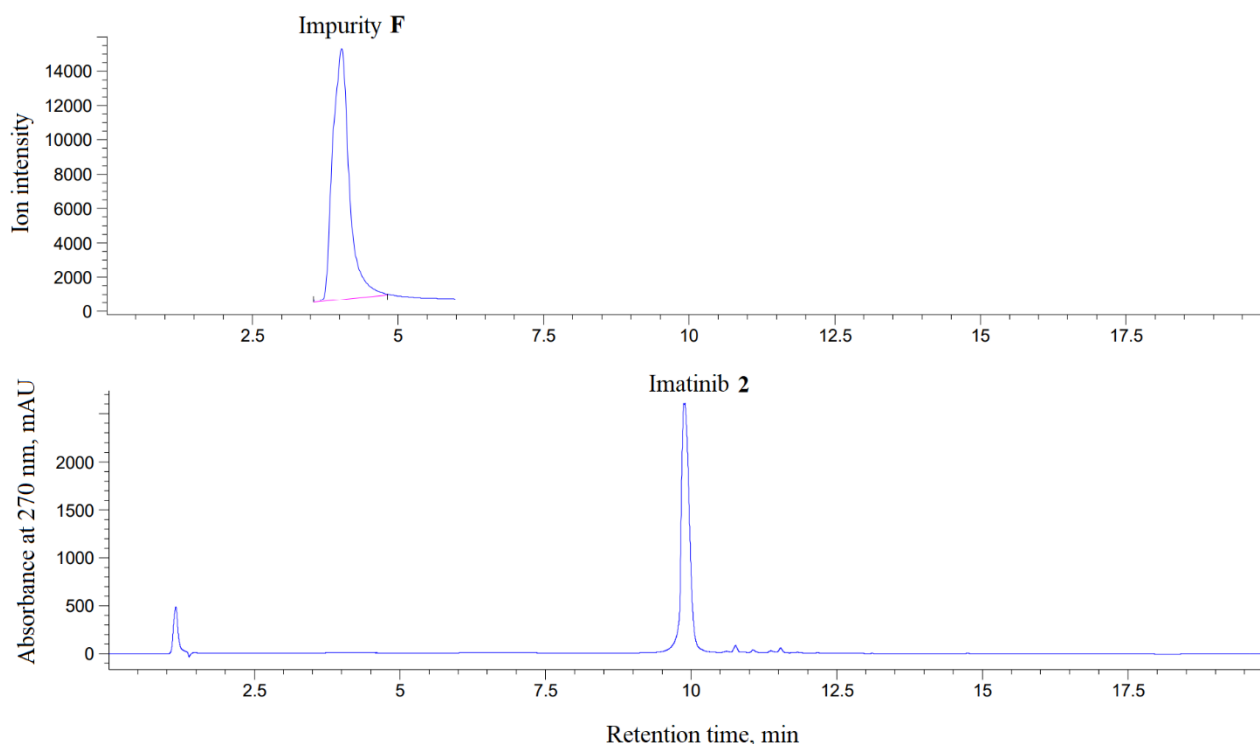

**Figure S10.** Upper: HPLC monitored ion count chromatogram of impurity **F**, lower: HPLC-UV chromatogram of Imatinib **2** at 270 nm.

$X = 556 \pm 25$  ppm

## 6.2. Optimization studies for reducing the content of amine **16**.

In order to decrease the content of impurity **F**, slight modifications in the previously described protocol for the synthesis of amide **18** (see section 3, p. S11) were performed (modifications are underlined):

Amine **16** (300 mg, 1.08 mmol), acid **1** (214 mg, 1.41 mmol, 1.3 equiv.), EDC HCl (228 mg, 1.19 mmol, 1.1 equiv.) and EtOAc (375  $\mu$ L) were placed into a 14 mL ZrO<sub>2</sub>-coated jar charged with one 10 mm ZrO<sub>2</sub> ball. The second jar was loaded with the same amount of chemicals and the two jars were set to mill at 30 Hz for 90 min. The resulting crude reaction mixtures were combined and transferred to a beaker, diluted with 5% KOH solution (ca. 20 mL), stirred for 2 hours, then filtered through a glass filter, washed with water (2 $\times$ 10 mL) and dried first in air ant then under vacuum. Product **18** was obtained as a yellowish solid (840 mg, 94% yield, 99% HPLC purity, Figure S11). Next, dichloromethane (ca. 25 mL) was added to the obtained solid amide **18**, and the resulting suspension was stirred for 1 hour, then filtered through a glass filter, washed with dichloromethane (2 $\times$ 10 mL) and dried first in air ant then under vacuum. Product **18** was obtained as a yellowish solid (805 mg, 90% yield, 99.6% HPLC purity, Figure S12).



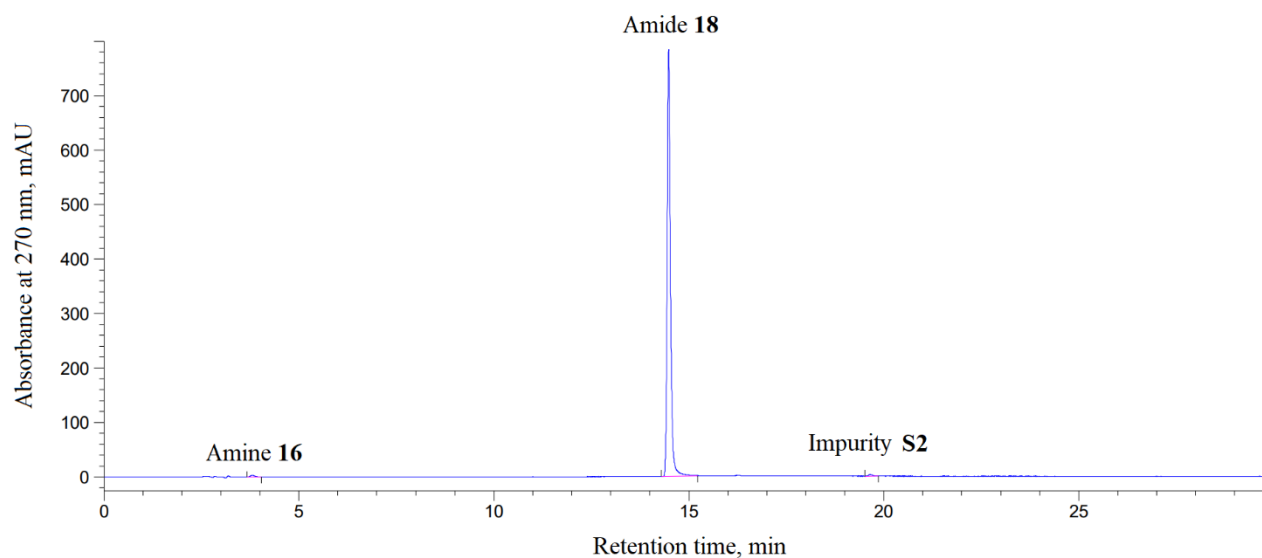

**Figure S11.** HPLC-UV chromatogram of amide **18** (99.0%), containing impurity **S2** (0.46) and amine **16** (0.51).

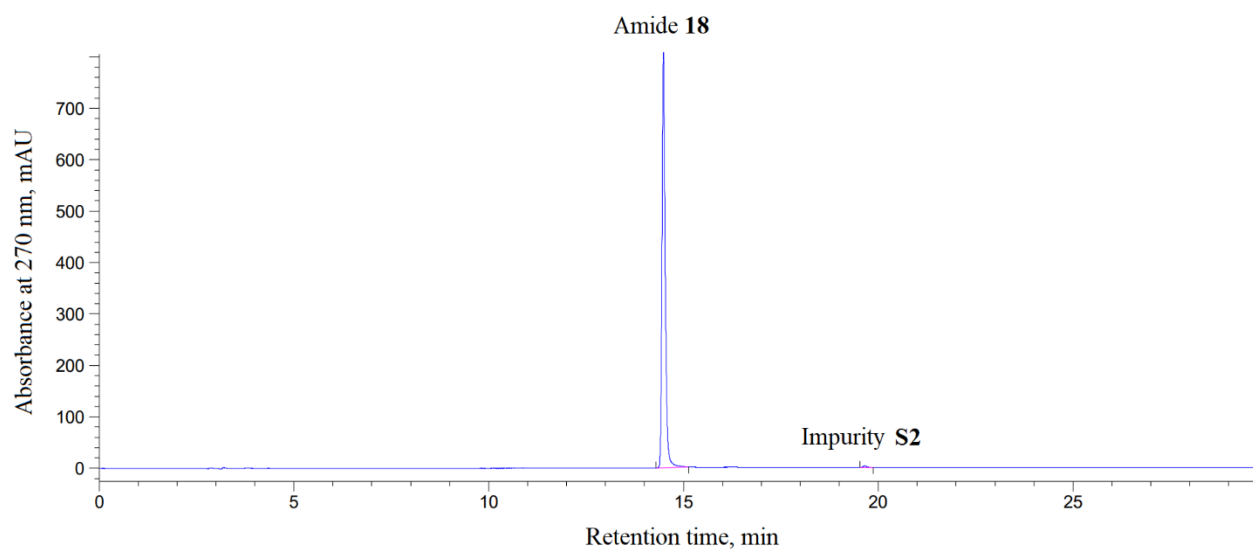

**Figure S12.** HPLC-UV chromatogram of amide **18** (99.6%), containing impurity **S2** (0.44).

Imatinib **2** was synthesised according to the previously described protocol (see section 4, p. S14). Further assay of impurity F was determined in the crude product **2** prior to the recrystallization.



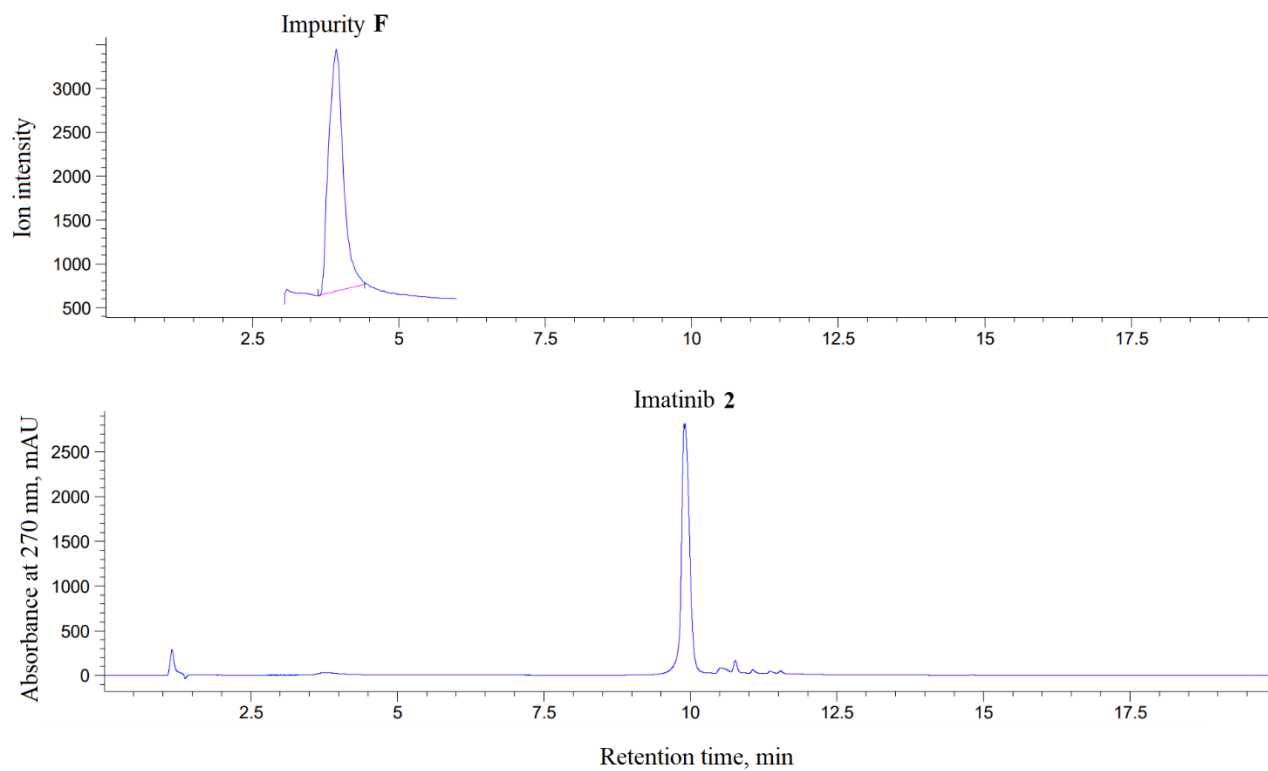

**Figure S13.** Upper: HPLC monitored ion count chromatogram of impurity **F**, lower: HPLC-UV chromatogram of Imatinib **2** at 270 nm.

$X = 86 \pm 3$  ppm



## 7. Green Chemistry metrics

Green chemistry metrics analysis have been performed for the developed mechanochemical procedure and six previously published protocols,<sup>14–19</sup> including three patents and three research articles (Table S6). The described protocols start from 4-(chloromethyl)benzoic acid **S3** (Table S6, entry 1), or 4-(chloromethyl)benzoyl chloride **15** (Table S6, entries 2, 5 and 6), or 4-(hydroxymethyl)benzoic acid **1** (Table S6, entries 3, 4 and 7). The metrics were evaluated for the total process (2 or 3 steps).

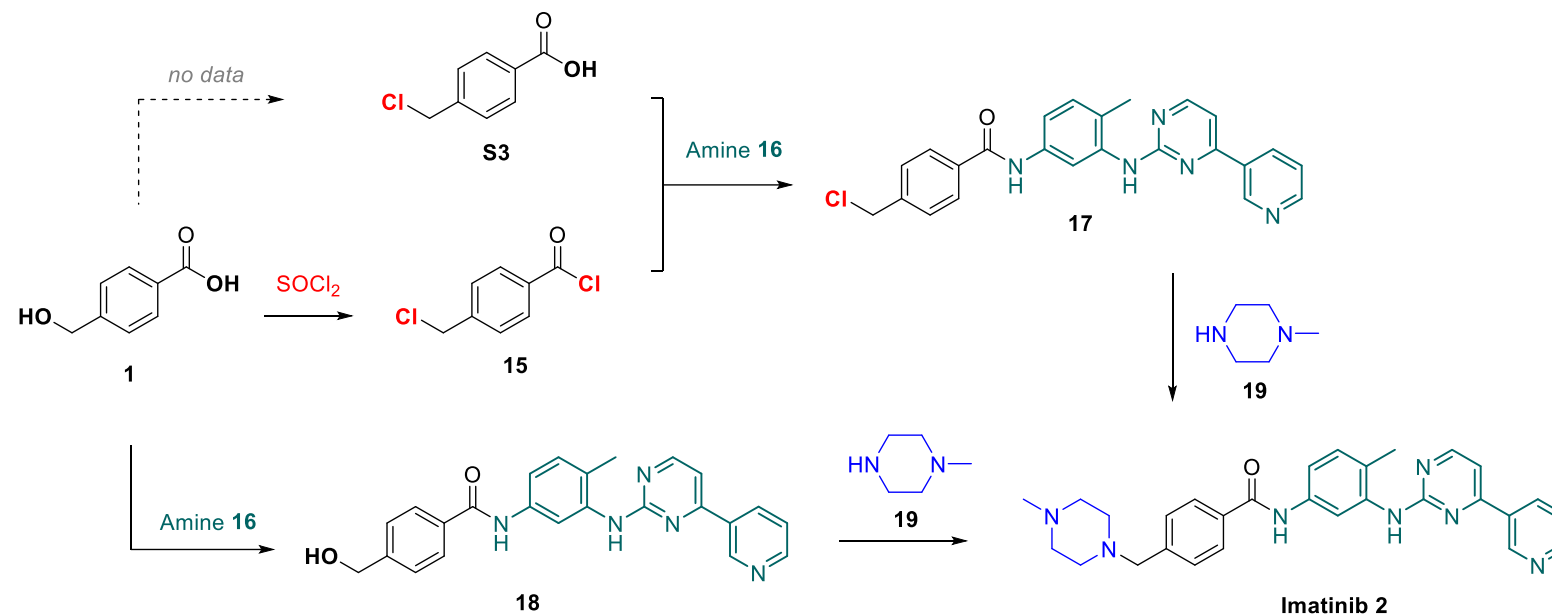



**Table S6.** Comparison of green metrics for mechanochemical and solution-based key-step synthesis of Imatinib **2**.

| Entry | Manufacturer or Publication         | St. material | № of constructive/total steps | Mass of product | Total yield                                                                                       | AE   | RME  | Total PMI | PMI r-n | PMI r-n solvents | PMI work-up solvents | Solvents                                                                                                                                      | Hazards                                                                                     |                                       |                       |                         |
|-------|-------------------------------------|--------------|-------------------------------|-----------------|---------------------------------------------------------------------------------------------------|------|------|-----------|---------|------------------|----------------------|-----------------------------------------------------------------------------------------------------------------------------------------------|---------------------------------------------------------------------------------------------|---------------------------------------|-----------------------|-------------------------|
|       |                                     |              |                               |                 |                                                                                                   |      |      |           |         |                  |                      |                                                                                                                                               | Thermal                                                                                     | Reagent                               | Products              | Genotoxic intermediates |
| 1     | ACTAVIS GROUP PTC EHF <sup>14</sup> | S3           | 2/2                           | 240g            |  78              | 58.3 | 9.5  | 131.9     | 20.1    | 9.6              | 110.5                |  1,4-dioxane, DMF, THF, Acetone, EtOAc, H <sub>2</sub> O   |  65-70°C | 1,4-dioxane (H350), DMF (H360D)       | SO <sub>2</sub> , HCl | 16, 17                  |
| 2     | Y. Heo et al. <sup>15</sup>         | 15           | 2/2                           | 0.51 g          |  84              | 68.8 | 38.4 | >36.8     | 36.8    | 34.1             |                      |  DMF, THF, H <sub>2</sub> O                                |  90°C    | DMF (H360D)                           |                       | 16, 17                  |
| 3     | Liu et al. 2008 <sup>16</sup>       | 1            | 2/3                           | 0.45 g          |  85              | 50.9 | 3.8  | 563.5     | 43.5    | 17               | 520                  |  CH <sub>2</sub> Cl <sub>2</sub> , THF, H <sub>2</sub> O   |  140°C   |                                       | SO <sub>2</sub> , HCl | 16, 17                  |
| 4     | NATCO Pharma LTD <sup>17</sup>      | 1            | 2/3                           | 9.8 kg          |  43              | 50.9 | 13.2 | 192.2     | 46.6    | 39.0             | 144.6                |  DMF, CHCl <sub>3</sub> , Toluene, EtOAc, H <sub>2</sub> O |  60°C    | DMF (H360D), CHCl <sub>3</sub> (H372) | SO <sub>2</sub> , HCl | 16, 17                  |
| 5     | Z. Szakács et al. <sup>18</sup>     | 15           | 2/2                           | 1.25 g          |  41              | 74.1 | 17.0 | >364.8    | 158.4   | 152.5            | 206.4                |  DMF, ACN, EtOH, H <sub>2</sub> O                          |  80°C    | DMF (H360D)                           |                       | 16, 17                  |
| 6     | W. Szczepek et al. <sup>19</sup>    | 15           | 2/2                           | 60.6 g          |  95              | 74.1 | 44.0 | 42.6      | 12.1    | 9.2              | 30.4                 |  THF, H <sub>2</sub> O                                     |  140°C   |                                       |                       | 16, 17                  |
| 7     | This work                           | 1            | 2/2                           | 0.66 g          |  86 <sup>a</sup> | 39.1 | 17.0 | 221.0     | 8.9     | 3.0              | 212.1                |  EtOAc, DMI, H <sub>2</sub> O                              |  r.t.    | EDC (H410)                            | TMU (H360)            | 16, -                   |

<sup>a</sup>Yield is adjusted considering HPLC purity (95%) of obtained product.



Among the described protocols,<sup>14–19</sup> the shortest routes for which the complete data were available for calculations, was an early-stage development described by Liu et al.<sup>16</sup> and an example of kilo-scale preparation patented by NATCO Pharma LTD.<sup>17</sup> Activation of hydroxy acid **1** by its conversion into the corresponding chloride by the reaction with SOCl<sub>2</sub> was used in both approaches as an additional non-constructive step.

The mass-based metrics have been calculated considering all steps of the respective preparation route combined. In terms of total yield (86%), the mechanochemical approach delivered comparable or superior results as the benchmark solution-state approaches. Atom economy (AE), which reflects the theoretical efficiency of reactant utilization, is lower in the mechanochemical route (AE = 39.1) due to the higher molecular weight of the reagents involved. However, reaction mass efficiency (RME), which represents the actual maximum efficiency of reactant utilization,<sup>20</sup> is noticeably better (RME = 17.0) compared to the solution-based protocols, in which larger excesses of chemicals was used. Finally, total process mass intensity (total PMI), which reflects the amount of waste generated per unit of product, is about 2.5 times lower than in a similar early-stage development solution route (PMI = 563.5 vs 221.0) and is comparable with PMI of a kilo-scale preparation (PMI = 192.2). It is important to note that the main contributor to PMI in the case of mechanochemical synthesis was work-up solvent (water, PMI = 212.1) rather than chemicals (PMI = 8.9) and reactions solvents (PMI = 3.0). In terms of two former, the mechanochemical route greatly surpasses the benchmarking solution approaches, in which excess of reactants and use of bulk solvents increase the PMI significantly. Furthermore, the mechanochemical protocol relies on the use of green and sustainable solvents for work-up (water) and as LAG additives (ethyl acetate, dimethyl isosorbide). This contrasts a larger portfolio of solvents which was involved in the solution-based preparations and includes several toxic compounds (DMF, CH<sub>2</sub>Cl<sub>2</sub>, chloroform). It worth also noting a room temperature operation as an additional benefit of mechanochemistry, in contrast to the solution methods which rely on thermal activation and involve heating up to 140 °C. The streamlined isolation protocol of **18** and **2** by filtration and washing with water brings an additional advantage. Although the solvent-related and thermal hazards have been greatly attenuated in our approach, it still relies on a use of stoichiometric amide coupling reagents (EDC and TFFH) which themselves, or their reaction products (e.g., tetramethyl urea, TMU), could pose environmental or health hazards,<sup>21</sup> thus representing a disadvantage. On the other hand, TFFH is an air-stable and non-hygroscopic solid that offer a better safety profile<sup>21,22</sup> than other amide couplers.

Exclusion of the genotoxic intermediate **17** was another important advantage which is especially relevant to pharma synthesis. Since intermediate **18** with unknown properties was involved instead, additional *in silico* assessment was performed for the designed route to evaluate the safety profile of all known chemical entities involved. Knowledge-based and statistical systems were used to predict potential mutagenicity following the recommendations of the ICH M7 (R1) (2018) guideline. The knowledge-based system Derek Nexus and the statistical system Sarah Nexus were used to predict mutagenicity. Derek Nexus (Lhasa Ltd. Leeds, UK), is a rule-based expert system, which has been designed on the basis of open accessible and proprietary data. It generates predictions based on the knowledge about the relationship of substructures and biological activity in a given molecule. Sarah Nexus (Lhasa Ltd. Leeds, UK) is a statistical-based system. Structures submitted for processing were fragmented and these fragments are reviewed for activity vs inactivity. The model then arranges those 'interesting' fragments into a network of hypotheses (or nodes) and relevant hypotheses are used to inform an overall prediction of toxicity. Sarah Nexus predicts activity or inactivity in the Ames test and provides information on coverage of a query compound. As a result, intermediate **18** displayed no structural concern for mutagenicity.



[illegible]



| Supply remaining | Flag colour | Note element |
|------------------|-------------|--------------|
| 5-50 years       | Red Flag    |              |
| 50-500 years     | Amber Flag  | +            |
| +500 years       | Green Flag  |              |

| Energy (First Pass)                          |            | Tick |
|----------------------------------------------|------------|------|
| Reaction run between 0 to 70°C               | Green Flag | +    |
| Reaction run between -20 to 0 or 70 to 140°C | Amber Flag |      |
| Reaction run below -20 or above 140°C        | Red Flag   |      |

|                                                                                                              |            | Tick        |
|--------------------------------------------------------------------------------------------------------------|------------|-------------|
| Reaction run at reflux                                                                                       | Red Flag   | +           |
| Reaction run 5°C or more below the solvent boiling point                                                     | Green Flag |             |
| <b>Work Up</b>                                                                                               |            | <b>List</b> |
| quenching<br>filtration                                                                                      | Green Flag | +           |
| centrifugation<br>crystallisation                                                                            |            |             |
| Low temperature<br>distillation/evaporation/ sublimation (< solvent exchange, quenching into aqueous solvent |            |             |
| chromatography/ion exchange<br>high temperature<br>multiple recrystallisation                                | Amber Flag | +           |
|                                                                                                              | Red Flag   |             |

S27



[illegible]



[illegible]



| Summary of First Pass Metrics Toolkit |                                    |          |        |         |          |          |         |          |                                 |                           |                               |          |                  |          |                |              |                               |          |  |  |
|---------------------------------------|------------------------------------|----------|--------|---------|----------|----------|---------|----------|---------------------------------|---------------------------|-------------------------------|----------|------------------|----------|----------------|--------------|-------------------------------|----------|--|--|
| Yield, AE, RME, MI/PMI and OE         |                                    |          |        |         |          |          |         |          |                                 |                           |                               |          |                  |          |                |              |                               |          |  |  |
| Stoichiometry                         | Reactant (Limiting Reactant First) | Mass (g) | MW     | Mol     | Catalyst | Mass (g) | Reagent | Mass (g) | Reaction solvent                | Volume (cm <sup>3</sup> ) | Density (g ml <sup>-1</sup> ) | Mass (g) | Work up chemical | Mass (g) | Workup solvent | Volume (cm3) | Density (g ml <sup>-1</sup> ) | Mass (g) |  |  |
| 1                                     | Amine                              | 0.30     | 277.00 | 0.00108 |          |          |         |          | CH <sub>2</sub> Cl <sub>2</sub> | 0.71                      | 1.33                          | 0.94     |                  |          | Water          | 234.00       | 1.00                          | 234.00   |  |  |
| 1                                     | 4-hydroxymethyl benzoic acid       | 0.22     | 152.00 | 0.00141 |          |          |         |          | THF                             | 7.55                      | 0.89                          | 6.71     |                  |          |                |              |                               | 0.00     |  |  |
| 2                                     | Thionyl chloride                   | 1.16     | 118.97 | 0.00975 |          |          |         |          |                                 |                           |                               | 0.00     |                  |          |                |              |                               | 0.00     |  |  |
| 2                                     | N-methylpiperazine                 | 10.00    | 100.17 | 0.09984 |          |          |         |          |                                 |                           |                               | 0.00     |                  |          |                |              |                               | 0.00     |  |  |
| 1                                     | Triethylamine                      | 0.23     | 101.19 | 0.00223 |          |          |         |          |                                 |                           |                               | 0.00     |                  |          |                |              |                               | 0.00     |  |  |
|                                       |                                    |          |        |         |          |          |         |          |                                 |                           |                               | 0.00     |                  |          |                |              |                               | 0.00     |  |  |
|                                       |                                    |          |        |         |          |          |         |          |                                 |                           |                               | 0.00     |                  |          |                |              |                               | 0.00     |  |  |
|                                       | Total                              | 11.90    | 968.46 |         |          | 0.00     |         | 0.00     |                                 |                           |                               | 7.66     |                  | 0.00     |                |              |                               | 234.00   |  |  |
|                                       |                                    |          |        |         |          |          |         |          | Flag                            |                           |                               |          |                  |          |                |              |                               |          |  |  |
|                                       |                                    |          |        |         |          |          |         |          | Yield                           | 84.8                      |                               | 84.8     |                  |          |                |              |                               |          |  |  |
|                                       |                                    |          |        |         |          |          |         |          | Conversion                      | 100.0                     |                               | 100.0    |                  |          |                |              |                               |          |  |  |
|                                       |                                    |          |        |         |          |          |         |          | Selectivity                     | 84.8                      |                               | 84.8     |                  |          |                |              |                               |          |  |  |
|                                       |                                    |          |        |         |          |          |         |          | AE                              | 50.3                      |                               |          |                  |          |                |              |                               |          |  |  |
|                                       |                                    |          |        |         |          |          |         |          | RME                             | 3.8                       | OE                            | 7.4      |                  |          |                |              |                               |          |  |  |
|                                       |                                    |          |        |         |          |          |         |          | PMI total                       | 563.5                     |                               |          |                  |          |                |              |                               |          |  |  |
|                                       |                                    |          |        |         |          |          |         |          | PMI Reaction                    | 43.5                      |                               |          |                  |          |                |              |                               |          |  |  |
|                                       |                                    |          |        |         |          |          |         |          | reagents, catalyst              | 26.4                      |                               |          |                  |          |                |              |                               |          |  |  |
|                                       |                                    |          |        |         |          |          |         |          | PMI reaction solvents           | 17.0                      |                               |          |                  |          |                |              |                               |          |  |  |
|                                       |                                    |          |        |         |          |          |         |          | PMI Workup                      | 520.0                     |                               |          |                  |          |                |              |                               |          |  |  |
|                                       |                                    |          |        |         |          |          |         |          | PMI Workup chemical             | 0.0                       |                               |          |                  |          |                |              |                               |          |  |  |
|                                       |                                    |          |        |         |          |          |         |          | PMI workup solvents             | 520.0                     |                               |          |                  |          |                |              |                               |          |  |  |
|                                       |                                    |          |        |         |          |          |         |          |                                 |                           |                               |          |                  |          |                |              |                               |          |  |  |
|                                       |                                    |          |        |         |          |          |         |          |                                 |                           |                               |          |                  |          |                |              |                               |          |  |  |
|                                       |                                    |          |        |         |          |          |         |          |                                 |                           |                               |          |                  |          |                |              |                               |          |  |  |
|                                       |                                    |          |        |         |          |          |         |          |                                 |                           |                               |          |                  |          |                |              |                               |          |  |  |
|                                       |                                    |          |        |         |          |          |         |          |                                 |                           |                               |          |                  |          |                |              |                               |          |  |  |
|                                       |                                    |          |        |         |          |          |         |          |                                 |                           |                               |          |                  |          |                |              |                               |          |  |  |
|                                       |                                    |          |        |         |          |          |         |          |                                 |                           |                               |          |                  |          |                |              |                               |          |  |  |
|                                       |                                    |          |        |         |          |          |         |          |                                 |                           |                               |          |                  |          |                |              |                               |          |  |  |
|                                       |                                    |          |        |         |          |          |         |          |                                 |                           |                               |          |                  |          |                |              |                               |          |  |  |
|                                       |                                    |          |        |         |          |          |         |          |                                 |                           |                               |          |                  |          |                |              |                               |          |  |  |
|                                       |                                    |          |        |         |          |          |         |          |                                 |                           |                               |          |                  |          |                |              |                               |          |  |  |
|                                       |                                    |          |        |         |          |          |         |          |                                 |                           |                               |          |                  |          |                |              |                               |          |  |  |
|                                       |                                    |          |        |         |          |          |         |          |                                 |                           |                               |          |                  |          |                |              |                               |          |  |  |
|                                       |                                    |          |        |         |          |          |         |          |                                 |                           |                               |          |                  |          |                |              |                               |          |  |  |
|                                       |                                    |          |        |         |          |          |         |          |                                 |                           |                               |          |                  |          |                |              |                               |          |  |  |
|                                       |                                    |          |        |         |          |          |         |          |                                 |                           |                               |          |                  |          |                |              |                               |          |  |  |
|                                       |                                    |          |        |         |          |          |         |          |                                 |                           |                               |          |                  |          |                |              |                               |          |  |  |
|                                       |                                    |          |        |         |          |          |         |          |                                 |                           |                               |          |                  |          |                |              |                               |          |  |  |
|                                       |                                    |          |        |         |          |          |         |          |                                 |                           |                               |          |                  |          |                |              |                               |          |  |  |
|                                       |                                    |          |        |         |          |          |         |          |                                 |                           |                               |          |                  |          |                |              |                               |          |  |  |
|                                       |                                    |          |        |         |          |          |         |          |                                 |                           |                               |          |                  |          |                |              |                               |          |  |  |
|                                       |                                    |          |        |         |          |          |         |          |                                 |                           |                               |          |                  |          |                |              |                               |          |  |  |
|                                       |                                    |          |        |         |          |          |         |          |                                 |                           |                               |          |                  |          |                |              |                               |          |  |  |
|                                       |                                    |          |        |         |          |          |         |          |                                 |                           |                               |          |                  |          |                |              |                               |          |  |  |
|                                       |                                    |          |        |         |          |          |         |          |                                 |                           |                               |          |                  |          |                |              |                               |          |  |  |
|                                       |                                    |          |        |         |          |          |         |          |                                 |                           |                               |          |                  |          |                |              |                               |          |  |  |
|                                       |                                    |          |        |         |          |          |         |          |                                 |                           |                               |          |                  |          |                |              |                               |          |  |  |
|                                       |                                    |          |        |         |          |          |         |          |                                 |                           |                               |          |                  |          |                |              |                               |          |  |  |
|                                       |                                    |          |        |         |          |          |         |          |                                 |                           |                               |          |                  |          |                |              |                               |          |  |  |
|                                       |                                    |          |        |         |          |          |         |          |                                 |                           |                               |          |                  |          |                |              |                               |          |  |  |
|                                       |                                    |          |        |         |          |          |         |          |                                 |                           |                               |          |                  |          |                |              |                               |          |  |  |
|                                       |                                    |          |        |         |          |          |         |          |                                 |                           |                               |          |                  |          |                |              |                               |          |  |  |
|                                       |                                    |          |        |         |          |          |         |          |                                 |                           |                               |          |                  |          |                |              |                               |          |  |  |
|                                       |                                    |          |        |         |          |          |         |          |                                 |                           |                               |          |                  |          |                |              |                               |          |  |  |
|                                       |                                    |          |        |         |          |          |         |          |                                 |                           |                               |          |                  |          |                |              |                               |          |  |  |
|                                       |                                    |          |        |         |          |          |         |          |                                 |                           |                               |          |                  |          |                |              |                               |          |  |  |
|                                       |                                    |          |        |         |          |          |         |          |                                 |                           |                               |          |                  |          |                |              |                               |          |  |  |
|                                       |                                    |          |        |         |          |          |         |          |                                 |                           |                               |          |                  |          |                |              |                               |          |  |  |
|                                       |                                    |          |        |         |          |          |         |          |                                 |                           |                               |          |                  |          |                |              |                               |          |  |  |
|                                       |                                    |          |        |         |          |          |         |          |                                 |                           |                               |          |                  |          |                |              |                               |          |  |  |
|                                       |                                    |          |        |         |          |          |         |          |                                 |                           |                               |          |                  |          |                |              |                               |          |  |  |
|                                       |                                    |          |        |         |          |          |         |          |                                 |                           |                               |          |                  |          |                |              |                               |          |  |  |
|                                       |                                    |          |        |         |          |          |         |          |                                 |                           |                               |          |                  |          |                |              |                               |          |  |  |
|                                       |                                    |          |        |         |          |          |         |          |                                 |                           |                               |          |                  |          |                |              |                               |          |  |  |
|                                       |                                    |          |        |         |          |          |         |          |                                 |                           |                               |          |                  |          |                |              |                               |          |  |  |
|                                       |                                    |          |        |         |          |          |         |          |                                 |                           |                               |          |                  |          |                |              |                               |          |  |  |
|                                       |                                    |          |        |         |          |          |         |          |                                 |                           |                               |          |                  |          |                |              |                               |          |  |  |
|                                       |                                    |          |        |         |          |          |         |          |                                 |                           |                               |          |                  |          |                |              |                               |          |  |  |
|                                       |                                    |          |        |         |          |          |         |          |                                 |                           |                               |          |                  |          |                |              |                               |          |  |  |
|                                       |                                    |          |        |         |          |          |         |          |                                 |                           |                               |          |                  |          |                |              |                               |          |  |  |
|                                       |                                    |          |        |         |          |          |         |          |                                 |                           |                               |          |                  |          |                |              |                               |          |  |  |
|                                       |                                    |          |        |         |          |          |         |          |                                 |                           |                               |          |                  |          |                |              |                               |          |  |  |
|                                       |                                    |          |        |         |          |          |         |          |                                 |                           |                               |          |                  |          |                |              |                               |          |  |  |
|                                       |                                    |          |        |         |          |          |         |          |                                 |                           |                               |          |                  |          |                |              |                               |          |  |  |
|                                       |                                    |          |        |         |          |          |         |          |                                 |                           |                               |          |                  |          |                |              |                               |          |  |  |
|                                       |                                    |          |        |         |          |          |         |          |                                 |                           |                               |          |                  |          |                |              |                               |          |  |  |
|                                       |                                    |          |        |         |          |          |         |          |                                 |                           |                               |          |                  |          |                |              |                               |          |  |  |
|                                       |                                    |          |        |         |          |          |         |          |                                 |                           |                               |          |                  |          |                |              |                               |          |  |  |
|                                       |                                    |          |        |         |          |          |         |          |                                 |                           |                               |          |                  |          |                |              |                               |          |  |  |
|                                       |                                    |          |        |         |          |          |         |          |                                 |                           |                               |          |                  |          |                |              |                               |          |  |  |
|                                       |                                    |          |        |         |          |          |         |          |                                 |                           |                               |          |                  |          |                |              |                               |          |  |  |
|                                       |                                    |          |        |         |          |          |         |          |                                 |                           |                               |          |                  |          |                |              |                               |          |  |  |
|                                       |                                    |          |        |         |          |          |         |          |                                 |                           |                               |          |                  |          |                |              |                               |          |  |  |
|                                       |                                    |          |        |         |          |          |         |          |                                 |                           |                               |          |                  |          |                |              |                               |          |  |  |
|                                       |                                    |          |        |         |          |          |         |          |                                 |                           |                               |          |                  |          |                |              |                               |          |  |  |
|                                       |                                    |          |        |         |          |          |         |          |                                 |                           |                               |          |                  |          |                |              |                               |          |  |  |
|                                       |                                    |          |        |         |          |          |         |          |                                 |                           |                               |          |                  |          |                |              |                               |          |  |  |
|                                       |                                    |          |        |         |          |          |         |          |                                 |                           |                               |          |                  |          |                |              |                               |          |  |  |
|                                       |                                    |          |        |         |          |          |         |          |                                 |                           |                               |          |                  |          |                |              |                               |          |  |  |
|                                       |                                    |          |        |         |          |          |         |          |                                 |                           |                               |          |                  |          |                |              |                               |          |  |  |
|                                       |                                    |          |        |         |          |          |         |          |                                 |                           |                               |          |                  |          |                |              |                               |          |  |  |
|                                       |                                    |          |        |         |          |          |         |          |                                 |                           |                               |          |                  |          |                |              |                               |          |  |  |
|                                       |                                    |          |        |         |          |          |         |          |                                 |                           |                               |          |                  |          |                |              |                               |          |  |  |
|                                       |                                    |          |        |         |          |          |         |          |                                 |                           |                               |          |                  |          |                |              |                               |          |  |  |
|                                       |                                    |          |        |         |          |          |         |          |                                 |                           |                               |          |                  |          |                |              |                               |          |  |  |
|                                       |                                    |          |        |         |          |          |         |          |                                 |                           |                               |          |                  |          |                |              |                               |          |  |  |
|                                       |                                    |          |        |         |          |          |         |          |                                 |                           |                               |          |                  |          |                |              |                               |          |  |  |
|                                       |                                    |          |        |         |          |          |         |          |                                 |                           |                               |          |                  |          |                |              |                               |          |  |  |
|                                       |                                    |          |        |         |          |          |         |          |                                 |                           |                               |          |                  |          |                |              |                               |          |  |  |
|                                       |                                    |          |        |         |          |          |         |          |                                 |                           |                               |          |                  |          |                |              |                               |          |  |  |
|                                       |                                    |          |        |         |          |          |         |          |                                 |                           |                               |          |                  |          |                |              |                               |          |  |  |
|                                       |                                    |          |        |         |          |          |         |          |                                 |                           |                               |          |                  |          |                |              |                               |          |  |  |
|                                       |                                    |          |        |         |          |          |         |          |                                 |                           |                               |          |                  |          |                |              |                               |          |  |  |
|                                       |                                    |          |        |         |          |          |         |          |                                 |                           |                               |          |                  |          |                |              |                               |          |  |  |
|                                       |                                    |          |        |         |          |          |         |          |                                 |                           |                               |          |                  |          |                |              |                               |          |  |  |
|                                       |                                    |          |        |         |          |          |         |          |                                 |                           |                               |          |                  |          |                |              |                               |          |  |  |
|                                       |                                    |          |        |         |          |          |         |          |                                 |                           |                               |          |                  |          |                |              |                               |          |  |  |
|                                       |                                    |          |        |         |          |          |         |          |                                 |                           |                               |          |                  |          |                |              |                               |          |  |  |
|                                       |                                    |          |        |         |          |          |         |          |                                 |                           |                               |          |                  |          |                |              |                               |          |  |  |
|                                       |                                    |          |        |         |          |          |         |          |                                 |                           |                               |          |                  |          |                |              |                               |          |  |  |
|                                       |                                    |          |        |         |          |          |         |          |                                 |                           |                               |          |                  |          |                |              |                               |          |  |  |
|                                       |                                    |          |        |         |          |          |         |          |                                 |                           |                               |          |                  |          |                |              |                               |          |  |  |
|                                       |                                    |          |        |         |          |          |         |          |                                 |                           |                               |          |                  |          |                |              |                               |          |  |  |
|                                       |                                    |          |        |         |          |          |         |          |                                 |                           |                               |          |                  |          |                |              |                               |          |  |  |
|                                       |                                    |          |        |         |          |          |         |          |                                 |                           |                               |          |                  |          |                |              |                               |          |  |  |
|                                       |                                    |          |        |         |          |          |         |          |                                 |                           |                               |          |                  |          |                |              |                               |          |  |  |
|                                       |                                    |          |        |         |          |          |         |          |                                 |                           |                               |          |                  |          |                |              |                               |          |  |  |
|                                       |                                    |          |        |         |          |          |         |          |                                 |                           |                               |          |                  |          |                |              |                               |          |  |  |
|                                       |                                    |          |        |         |          |          |         |          |                                 |                           |                               |          |                  |          |                |              |                               |          |  |  |
|                                       |                                    |          |        |         |          |          |         |          |                                 |                           |                               |          |                  |          |                |              |                               |          |  |  |
|                                       |                                    |          |        |         |          |          |         |          |                                 |                           |                               |          |                  |          |                |              |                               |          |  |  |
|                                       |                                    |          |        |         |          |          |         |          |                                 |                           |                               |          |                  |          |                |              |                               |          |  |  |
|                                       |                                    |          |        |         |          |          |         |          |                                 |                           |                               |          |                  |          |                |              |                               |          |  |  |
|                                       |                                    |          |        |         |          |          |         |          |                                 |                           |                               |          |                  |          |                |              |                               |          |  |  |
|                                       |                                    |          |        |         |          |          |         |          |                                 |                           |                               |          |                  |          |                |              |                               |          |  |  |
|                                       |                                    |          |        |         |          |          |         |          |                                 |                           |                               |          |                  |          |                |              |                               |          |  |  |
|                                       |                                    |          |        |         |          |          |         |          |                                 |                           |                               |          |                  |          |                |              |                               |          |  |  |
|                                       |                                    |          |        |         |          |          |         |          |                                 |                           |                               |          |                  |          |                |              |                               |          |  |  |
|                                       |                                    |          |        |         |          |          |         |          |                                 |                           |                               |          |                  |          |                |              |                               |          |  |  |
|                                       |                                    |          |        |         |          |          |         |          |                                 |                           |                               |          |                  |          |                |              |                               |          |  |  |
|                                       |                                    |          |        |         |          |          |         |          |                                 |                           |                               |          |                  |          |                |              |                               |          |  |  |
|                                       |                                    |          |        |         |          |          |         |          |                                 |                           |                               |          |                  |          |                |              |                               |          |  |  |
|                                       |                                    |          |        |         |          |          |         |          |                                 |                           |                               |          |                  |          |                |              |                               |          |  |  |
|                                       |                                    |          |        |         |          |          |         |          |                                 |                           |                               |          |                  |          |                |              |                               |          |  |  |
|                                       |                                    |          |        |         |          |          |         |          |                                 |                           |                               |          |                  |          |                |              |                               |          |  |  |
|                                       |                                    |          |        |         |          |          |         |          |                                 |                           |                               |          |                  |          |                |              |                               |          |  |  |
|                                       |                                    |          |        |         |          |          |         |          |                                 |                           |                               |          |                  |          |                |              |                               |          |  |  |
|                                       |                                    |          |        |         |          |          |         |          |                                 |                           |                               |          |                  |          |                |              |                               |          |  |  |
|                                       |                                    |          |        |         |          |          |         |          |                                 |                           |                               |          |                  |          |                |              |                               |          |  |  |
|                                       |                                    |          |        |         |          |          |         |          |                                 |                           |                               |          |                  |          |                |              |                               |          |  |  |
|                                       |                                    |          |        |         |          |          |         |          |                                 |                           |                               |          |                  |          |                |              |                               |          |  |  |
|                                       |                                    |          |        |         |          |          |         |          |                                 |                           |                               |          |                  |          |                |              |                               |          |  |  |
|                                       |                                    |          |        |         |          |          |         |          |                                 |                           |                               |          |                  |          |                |              |                               |          |  |  |
|                                       |                                    |          |        |         |          |          |         |          |                                 |                           |                               |          |                  |          |                |              |                               |          |  |  |
|                                       |                                    |          |        |         |          |          |         |          |                                 |                           |                               |          |                  |          |                |              |                               |          |  |  |
|                                       |                                    |          |        |         |          |          |         |          |                                 |                           |                               |          |                  |          |                |              |                               |          |  |  |
|                                       |                                    |          |        |         |          |          |         |          |                                 |                           |                               |          |                  |          |                |              |                               |          |  |  |
|                                       |                                    |          |        |         |          |          |         |          |                                 |                           |                               |          |                  |          |                |              |                               |          |  |  |
|                                       |                                    |          |        |         |          |          |         |          |                                 |                           |                               |          |                  |          |                |              |                               |          |  |  |
|                                       |                                    |          |        |         |          |          |         |          |                                 |                           |                               |          |                  |          |                |              |                               |          |  |  |
|                                       |                                    |          |        |         |          |          |         |          |                                 |                           |                               |          |                  |          |                |              |                               |          |  |  |
|                                       |                                    |          |        |         |          |          |         |          |                                 |                           |                               |          |                  |          |                |              |                               |          |  |  |
|                                       |                                    |          |        |         |          |          |         |          |                                 |                           |                               |          |                  |          |                |              |                               |          |  |  |
|                                       |                                    |          |        |         |          |          |         |          |                                 |                           |                               |          |                  |          |                |              |                               |          |  |  |
|                                       |                                    |          |        |         |          |          |         |          |                                 |                           |                               |          |                  |          |                |              |                               |          |  |  |
|                                       |                                    |          |        |         |          |          |         |          |                                 |                           |                               |          |                  |          |                |              |                               |          |  |  |
|                                       |                                    |          |        |         |          |          |         |          |                                 |                           |                               |          |                  |          |                |              |                               |          |  |  |
|                                       |                                    |          |        |         |          |          |         |          |                                 |                           |                               |          |                  |          |                |              |                               |          |  |  |
|                                       |                                    |          |        |         |          |          |         |          |                                 |                           |                               |          |                  |          |                |              |                               |          |  |  |
|                                       |                                    |          |        |         |          |          |         |          |                                 |                           |                               |          |                  |          |                |              |                               |          |  |  |
|                                       |                                    |          |        |         |          |          |         |          |                                 |                           |                               |          |                  |          |                |              |                               |          |  |  |
|                                       |                                    |          |        |         |          |          |         |          |                                 |                           |                               |          |                  |          |                |              |                               |          |  |  |
|                                       |                                    |          |        |         |          |          |         |          |                                 |                           |                               |          |                  |          |                |              |                               |          |  |  |
|                                       |                                    |          |        |         |          |          |         |          |                                 |                           |                               |          |                  |          |                |              |                               |          |  |  |
|                                       |                                    |          |        |         |          |          |         |          |                                 |                           |                               |          |                  |          |                |              |                               |          |  |  |
|                                       |                                    |          |        |         |          |          |         |          |                                 |                           |                               |          |                  |          |                |              |                               |          |  |  |
|                                       |                                    |          |        |         |          |          |         |          |                                 |                           |                               |          |                  |          |                |              |                               |          |  |  |
|                                       |                                    |          |        |         |          |          |         |          |                                 |                           |                               |          |                  |          |                |              |                               |          |  |  |
|                                       |                                    |          |        |         |          |          |         |          |                                 |                           |                               |          |                  |          |                |              |                               |          |  |  |
|                                       |                                    |          |        |         |          |          |         |          |                                 |                           |                               |          |                  |          |                |              |                               |          |  |  |
|                                       |                                    |          |        |         |          |          |         |          |                                 |                           |                               |          |                  |          |                |              |                               |          |  |  |
|                                       |                                    |          |        |         |          |          |         |          |                                 |                           |                               |          |                  |          |                |              |                               |          |  |  |
|                                       |                                    |          |        |         |          |          |         |          |                                 |                           |                               |          |                  |          |                |              |                               |          |  |  |
|                                       |                                    |          |        |         |          |          |         |          |                                 |                           |                               |          |                  |          |                |              |                               |          |  |  |
|                                       |                                    |          |        |         |          |          |         |          |                                 |                           |                               |          |                  |          |                |              |                               |          |  |  |
|                                       |                                    |          |        |         |          |          |         |          |                                 |                           |                               |          |                  |          |                |              |                               |          |  |  |
|                                       |                                    |          |        |         |          |          |         |          |                                 |                           |                               |          |                  |          |                |              |                               |          |  |  |
|                                       |                                    |          |        |         |          |          |         |          |                                 |                           |                               |          |                  |          |                |              |                               |          |  |  |
|                                       |                                    |          |        |         |          |          |         |          |                                 |                           |                               |          |                  |          |                |              |                               |          |  |  |
|                                       |                                    |          |        |         |          |          |         |          |                                 |                           |                               |          |                  |          |                |              |                               |          |  |  |
|                                       |                                    |          |        |         |          |          |         |          |                                 |                           |                               |          |                  |          |                |              |                               |          |  |  |
|                                       |                                    |          |        |         |          |          |         |          |                                 |                           |                               |          |                  |          |                |              |                               |          |  |  |
|                                       |                                    |          |        |         |          |          |         |          |                                 |                           |                               |          |                  |          |                |              |                               |          |  |  |
|                                       |                                    |          |        |         |          |          |         |          |                                 |                           |                               |          |                  |          |                |              |                               |          |  |  |
|                                       |                                    |          |        |         |          |          |         |          |                                 |                           |                               |          |                  |          |                |              |                               |          |  |  |
|                                       |                                    |          |        |         |          |          |         |          |                                 |                           |                               |          |                  |          |                |              |                               |          |  |  |
|                                       |                                    |          |        |         |          |          |         |          |                                 |                           |                               |          |                  |          |                |              |                               |          |  |  |
|                                       |                                    |          |        |         |          |          |         |          |                                 |                           |                               |          |                  |          |                |              |                               |          |  |  |
|                                       |                                    |          |        |         |          |          |         |          |                                 |                           |                               |          |                  |          |                |              |                               |          |  |  |
|                                       |                                    |          |        |         |          |          |         |          |                                 |                           |                               |          |                  |          |                |              |                               |          |  |  |
|                                       |                                    |          |        |         |          |          |         |          |                                 |                           |                               |          |                  |          |                |              |                               |          |  |  |
|                                       |                                    |          |        |         |          |          |         |          |                                 |                           |                               |          |                  |          |                |              |                               |          |  |  |
|                                       |                                    |          |        |         |          |          |         |          |                                 |                           |                               |          |                  |          |                |              |                               |          |  |  |
|                                       |                                    |          |        |         |          |          |         |          |                                 |                           |                               |          |                  |          |                |              |                               |          |  |  |
|                                       |                                    |          |        |         |          |          |         |          |                                 |                           |                               |          |                  |          |                |              |                               |          |  |  |
|                                       |                                    |          |        |         |          |          |         |          |                                 |                           |                               |          |                  |          |                |              |                               |          |  |  |
|                                       |                                    |          |        |         |          |          |         |          |                                 |                           |                               |          |                  |          |                |              |                               |          |  |  |
|                                       |                                    |          |        |         |          |          |         |          |                                 |                           |                               |          |                  |          |                |              |                               |          |  |  |
|                                       |                                    |          |        |         |          |          |         |          |                                 |                           |                               |          |                  |          |                |              |                               |          |  |  |
|                                       |                                    |          |        |         |          |          |         |          |                                 |                           |                               |          |                  |          |                |              |                               |          |  |  |
|                                       |                                    |          |        |         |          |          |         |          |                                 |                           |                               |          |                  |          |                |              |                               |          |  |  |
|                                       |                                    |          |        |         |          |          |         |          |                                 |                           |                               |          |                  |          |                |              |                               |          |  |  |
|                                       |                                    |          |        |         |          |          |         |          |                                 |                           |                               |          |                  |          |                |              |                               |          |  |  |
|                                       |                                    |          |        |         |          |          |         |          |                                 |                           |                               |          |                  |          |                |              |                               |          |  |  |
|                                       |                                    |          |        |         |          |          |         |          |                                 |                           |                               |          |                  |          |                |              |                               |          |  |  |
|                                       |                                    |          |        |         |          |          |         |          |                                 |                           |                               |          |                  |          |                |              |                               |          |  |  |
|                                       |                                    |          |        |         |          |          |         |          |                                 |                           |                               |          |                  |          |                |              |                               |          |  |  |
|                                       |                                    |          |        |         |          |          |         |          |                                 |                           |                               |          |                  |          |                |              |                               |          |  |  |
|                                       |                                    |          |        |         |          |          |         |          |                                 |                           |                               |          |                  |          |                |              |                               |          |  |  |
|                                       |                                    |          |        |         |          |          |         |          |                                 |                           |                               |          |                  |          |                |              |                               |          |  |  |
|                                       |                                    |          |        |         |          |          |         |          |                                 |                           |                               |          |                  |          |                |              |                               |          |  |  |
|                                       |                                    |          |        |         |          |          |         |          |                                 |                           |                               |          |                  |          |                |              |                               |          |  |  |







[illegible]



# Critical elements

| Supply remaining | Flag colour | Note element |
|------------------|-------------|--------------|
| 5-50 years       | Red Flag    |              |
| 50-500 years     | Amber Flag  | +            |
| +500 years       | Green Flag  |              |

|                                                                                            |  |  |  |  |  |  |  |  |  |  |  |  |  |  |  |  |     |               |  |
|--------------------------------------------------------------------------------------------|--|--|--|--|--|--|--|--|--|--|--|--|--|--|--|--|-----|---------------|--|
| Remaining years until depletion of known reserves<br>(based on current rate of extraction) |  |  |  |  |  |  |  |  |  |  |  |  |  |  |  |  |     | He<br>(inert) |  |
| 0-50 years                                                                                 |  |  |  |  |  |  |  |  |  |  |  |  |  |  |  |  |     |               |  |
| 50-100 years                                                                               |  |  |  |  |  |  |  |  |  |  |  |  |  |  |  |  |     |               |  |
| 100-500 years                                                                              |  |  |  |  |  |  |  |  |  |  |  |  |  |  |  |  |     |               |  |
| 1                                                                                          |  |  |  |  |  |  |  |  |  |  |  |  |  |  |  |  | 18  | He            |  |
| 2                                                                                          |  |  |  |  |  |  |  |  |  |  |  |  |  |  |  |  | 19  |               |  |
| 3                                                                                          |  |  |  |  |  |  |  |  |  |  |  |  |  |  |  |  | 20  |               |  |
| 4                                                                                          |  |  |  |  |  |  |  |  |  |  |  |  |  |  |  |  | 21  |               |  |
| 5                                                                                          |  |  |  |  |  |  |  |  |  |  |  |  |  |  |  |  | 22  |               |  |
| 6                                                                                          |  |  |  |  |  |  |  |  |  |  |  |  |  |  |  |  | 23  |               |  |
| 7                                                                                          |  |  |  |  |  |  |  |  |  |  |  |  |  |  |  |  | 24  |               |  |
| 8                                                                                          |  |  |  |  |  |  |  |  |  |  |  |  |  |  |  |  | 25  |               |  |
| 9                                                                                          |  |  |  |  |  |  |  |  |  |  |  |  |  |  |  |  | 26  |               |  |
| 10                                                                                         |  |  |  |  |  |  |  |  |  |  |  |  |  |  |  |  | 27  |               |  |
| 11                                                                                         |  |  |  |  |  |  |  |  |  |  |  |  |  |  |  |  | 28  |               |  |
| 12                                                                                         |  |  |  |  |  |  |  |  |  |  |  |  |  |  |  |  | 29  |               |  |
| 13                                                                                         |  |  |  |  |  |  |  |  |  |  |  |  |  |  |  |  | 30  |               |  |
| 14                                                                                         |  |  |  |  |  |  |  |  |  |  |  |  |  |  |  |  | 31  |               |  |
| 15                                                                                         |  |  |  |  |  |  |  |  |  |  |  |  |  |  |  |  | 32  |               |  |
| 16                                                                                         |  |  |  |  |  |  |  |  |  |  |  |  |  |  |  |  | 33  |               |  |
| 17                                                                                         |  |  |  |  |  |  |  |  |  |  |  |  |  |  |  |  | 34  |               |  |
| 18                                                                                         |  |  |  |  |  |  |  |  |  |  |  |  |  |  |  |  | 35  |               |  |
| 19                                                                                         |  |  |  |  |  |  |  |  |  |  |  |  |  |  |  |  | 36  |               |  |
| 20                                                                                         |  |  |  |  |  |  |  |  |  |  |  |  |  |  |  |  | 37  |               |  |
| 21                                                                                         |  |  |  |  |  |  |  |  |  |  |  |  |  |  |  |  | 38  |               |  |
| 22                                                                                         |  |  |  |  |  |  |  |  |  |  |  |  |  |  |  |  | 39  |               |  |
| 23                                                                                         |  |  |  |  |  |  |  |  |  |  |  |  |  |  |  |  | 40  |               |  |
| 24                                                                                         |  |  |  |  |  |  |  |  |  |  |  |  |  |  |  |  | 41  |               |  |
| 25                                                                                         |  |  |  |  |  |  |  |  |  |  |  |  |  |  |  |  | 42  |               |  |
| 26                                                                                         |  |  |  |  |  |  |  |  |  |  |  |  |  |  |  |  | 43  |               |  |
| 27                                                                                         |  |  |  |  |  |  |  |  |  |  |  |  |  |  |  |  | 44  |               |  |
| 28                                                                                         |  |  |  |  |  |  |  |  |  |  |  |  |  |  |  |  | 45  |               |  |
| 29                                                                                         |  |  |  |  |  |  |  |  |  |  |  |  |  |  |  |  | 46  |               |  |
| 30                                                                                         |  |  |  |  |  |  |  |  |  |  |  |  |  |  |  |  | 47  |               |  |
| 31                                                                                         |  |  |  |  |  |  |  |  |  |  |  |  |  |  |  |  | 48  |               |  |
| 32                                                                                         |  |  |  |  |  |  |  |  |  |  |  |  |  |  |  |  | 49  |               |  |
| 33                                                                                         |  |  |  |  |  |  |  |  |  |  |  |  |  |  |  |  | 50  |               |  |
| 34                                                                                         |  |  |  |  |  |  |  |  |  |  |  |  |  |  |  |  | 51  |               |  |
| 35                                                                                         |  |  |  |  |  |  |  |  |  |  |  |  |  |  |  |  | 52  |               |  |
| 36                                                                                         |  |  |  |  |  |  |  |  |  |  |  |  |  |  |  |  | 53  |               |  |
| 37                                                                                         |  |  |  |  |  |  |  |  |  |  |  |  |  |  |  |  | 54  |               |  |
| 38                                                                                         |  |  |  |  |  |  |  |  |  |  |  |  |  |  |  |  | 55  |               |  |
| 39                                                                                         |  |  |  |  |  |  |  |  |  |  |  |  |  |  |  |  | 56  |               |  |
| 40                                                                                         |  |  |  |  |  |  |  |  |  |  |  |  |  |  |  |  | 57  |               |  |
| 41                                                                                         |  |  |  |  |  |  |  |  |  |  |  |  |  |  |  |  | 58  |               |  |
| 42                                                                                         |  |  |  |  |  |  |  |  |  |  |  |  |  |  |  |  | 59  |               |  |
| 43                                                                                         |  |  |  |  |  |  |  |  |  |  |  |  |  |  |  |  | 60  |               |  |
| 44                                                                                         |  |  |  |  |  |  |  |  |  |  |  |  |  |  |  |  | 61  |               |  |
| 45                                                                                         |  |  |  |  |  |  |  |  |  |  |  |  |  |  |  |  | 62  |               |  |
| 46                                                                                         |  |  |  |  |  |  |  |  |  |  |  |  |  |  |  |  | 63  |               |  |
| 47                                                                                         |  |  |  |  |  |  |  |  |  |  |  |  |  |  |  |  | 64  |               |  |
| 48                                                                                         |  |  |  |  |  |  |  |  |  |  |  |  |  |  |  |  | 65  |               |  |
| 49                                                                                         |  |  |  |  |  |  |  |  |  |  |  |  |  |  |  |  | 66  |               |  |
| 50                                                                                         |  |  |  |  |  |  |  |  |  |  |  |  |  |  |  |  | 67  |               |  |
| 51                                                                                         |  |  |  |  |  |  |  |  |  |  |  |  |  |  |  |  | 68  |               |  |
| 52                                                                                         |  |  |  |  |  |  |  |  |  |  |  |  |  |  |  |  | 69  |               |  |
| 53                                                                                         |  |  |  |  |  |  |  |  |  |  |  |  |  |  |  |  | 70  |               |  |
| 54                                                                                         |  |  |  |  |  |  |  |  |  |  |  |  |  |  |  |  | 71  |               |  |
| 55                                                                                         |  |  |  |  |  |  |  |  |  |  |  |  |  |  |  |  | 72  |               |  |
| 56                                                                                         |  |  |  |  |  |  |  |  |  |  |  |  |  |  |  |  | 73  |               |  |
| 57                                                                                         |  |  |  |  |  |  |  |  |  |  |  |  |  |  |  |  | 74  |               |  |
| 58                                                                                         |  |  |  |  |  |  |  |  |  |  |  |  |  |  |  |  | 75  |               |  |
| 59                                                                                         |  |  |  |  |  |  |  |  |  |  |  |  |  |  |  |  | 76  |               |  |
| 60                                                                                         |  |  |  |  |  |  |  |  |  |  |  |  |  |  |  |  | 77  |               |  |
| 61                                                                                         |  |  |  |  |  |  |  |  |  |  |  |  |  |  |  |  | 78  |               |  |
| 62                                                                                         |  |  |  |  |  |  |  |  |  |  |  |  |  |  |  |  | 79  |               |  |
| 63                                                                                         |  |  |  |  |  |  |  |  |  |  |  |  |  |  |  |  | 80  |               |  |
| 64                                                                                         |  |  |  |  |  |  |  |  |  |  |  |  |  |  |  |  | 81  |               |  |
| 65                                                                                         |  |  |  |  |  |  |  |  |  |  |  |  |  |  |  |  | 82  |               |  |
| 66                                                                                         |  |  |  |  |  |  |  |  |  |  |  |  |  |  |  |  | 83  |               |  |
| 67                                                                                         |  |  |  |  |  |  |  |  |  |  |  |  |  |  |  |  | 84  |               |  |
| 68                                                                                         |  |  |  |  |  |  |  |  |  |  |  |  |  |  |  |  | 85  |               |  |
| 69                                                                                         |  |  |  |  |  |  |  |  |  |  |  |  |  |  |  |  | 86  |               |  |
| 70                                                                                         |  |  |  |  |  |  |  |  |  |  |  |  |  |  |  |  | 87  |               |  |
| 71                                                                                         |  |  |  |  |  |  |  |  |  |  |  |  |  |  |  |  | 88  |               |  |
| 72                                                                                         |  |  |  |  |  |  |  |  |  |  |  |  |  |  |  |  | 89  |               |  |
| 73                                                                                         |  |  |  |  |  |  |  |  |  |  |  |  |  |  |  |  | 90  |               |  |
| 74                                                                                         |  |  |  |  |  |  |  |  |  |  |  |  |  |  |  |  | 91  |               |  |
| 75                                                                                         |  |  |  |  |  |  |  |  |  |  |  |  |  |  |  |  | 92  |               |  |
| 76                                                                                         |  |  |  |  |  |  |  |  |  |  |  |  |  |  |  |  | 93  |               |  |
| 77                                                                                         |  |  |  |  |  |  |  |  |  |  |  |  |  |  |  |  | 94  |               |  |
| 78                                                                                         |  |  |  |  |  |  |  |  |  |  |  |  |  |  |  |  | 95  |               |  |
| 79                                                                                         |  |  |  |  |  |  |  |  |  |  |  |  |  |  |  |  | 96  |               |  |
| 80                                                                                         |  |  |  |  |  |  |  |  |  |  |  |  |  |  |  |  | 97  |               |  |
| 81                                                                                         |  |  |  |  |  |  |  |  |  |  |  |  |  |  |  |  | 98  |               |  |
| 82                                                                                         |  |  |  |  |  |  |  |  |  |  |  |  |  |  |  |  | 99  |               |  |
| 83                                                                                         |  |  |  |  |  |  |  |  |  |  |  |  |  |  |  |  | 100 |               |  |
| 84                                                                                         |  |  |  |  |  |  |  |  |  |  |  |  |  |  |  |  | 101 |               |  |
| 85                                                                                         |  |  |  |  |  |  |  |  |  |  |  |  |  |  |  |  | 102 |               |  |
| 86                                                                                         |  |  |  |  |  |  |  |  |  |  |  |  |  |  |  |  | 103 |               |  |
| 87                                                                                         |  |  |  |  |  |  |  |  |  |  |  |  |  |  |  |  | 104 |               |  |
| 88                                                                                         |  |  |  |  |  |  |  |  |  |  |  |  |  |  |  |  | 105 |               |  |
| 89                                                                                         |  |  |  |  |  |  |  |  |  |  |  |  |  |  |  |  | 106 |               |  |
| 90                                                                                         |  |  |  |  |  |  |  |  |  |  |  |  |  |  |  |  | 107 |               |  |
| 91                                                                                         |  |  |  |  |  |  |  |  |  |  |  |  |  |  |  |  | 108 |               |  |
| 92                                                                                         |  |  |  |  |  |  |  |  |  |  |  |  |  |  |  |  | 109 |               |  |
| 93                                                                                         |  |  |  |  |  |  |  |  |  |  |  |  |  |  |  |  | 110 |               |  |
| 94                                                                                         |  |  |  |  |  |  |  |  |  |  |  |  |  |  |  |  | 111 |               |  |
| 95                                                                                         |  |  |  |  |  |  |  |  |  |  |  |  |  |  |  |  | 112 |               |  |
| 96                                                                                         |  |  |  |  |  |  |  |  |  |  |  |  |  |  |  |  | 113 |               |  |
| 97                                                                                         |  |  |  |  |  |  |  |  |  |  |  |  |  |  |  |  | 114 |               |  |
| 98                                                                                         |  |  |  |  |  |  |  |  |  |  |  |  |  |  |  |  | 115 |               |  |
| 99                                                                                         |  |  |  |  |  |  |  |  |  |  |  |  |  |  |  |  | 116 |               |  |
| 100                                                                                        |  |  |  |  |  |  |  |  |  |  |  |  |  |  |  |  | 117 |               |  |
| 101                                                                                        |  |  |  |  |  |  |  |  |  |  |  |  |  |  |  |  | 118 |               |  |
| 102                                                                                        |  |  |  |  |  |  |  |  |  |  |  |  |  |  |  |  | 119 |               |  |
| 103                                                                                        |  |  |  |  |  |  |  |  |  |  |  |  |  |  |  |  | 120 |               |  |
| 104                                                                                        |  |  |  |  |  |  |  |  |  |  |  |  |  |  |  |  | 121 |               |  |
| 105                                                                                        |  |  |  |  |  |  |  |  |  |  |  |  |  |  |  |  | 122 |               |  |
| 106                                                                                        |  |  |  |  |  |  |  |  |  |  |  |  |  |  |  |  | 123 |               |  |
| 107                                                                                        |  |  |  |  |  |  |  |  |  |  |  |  |  |  |  |  | 124 |               |  |
| 108                                                                                        |  |  |  |  |  |  |  |  |  |  |  |  |  |  |  |  | 125 |               |  |
| 109                                                                                        |  |  |  |  |  |  |  |  |  |  |  |  |  |  |  |  | 126 |               |  |
| 110                                                                                        |  |  |  |  |  |  |  |  |  |  |  |  |  |  |  |  | 127 |               |  |
| 111                                                                                        |  |  |  |  |  |  |  |  |  |  |  |  |  |  |  |  | 128 |               |  |
| 112                                                                                        |  |  |  |  |  |  |  |  |  |  |  |  |  |  |  |  | 129 |               |  |
| 113                                                                                        |  |  |  |  |  |  |  |  |  |  |  |  |  |  |  |  | 130 |               |  |
| 114                                                                                        |  |  |  |  |  |  |  |  |  |  |  |  |  |  |  |  | 131 |               |  |
| 115                                                                                        |  |  |  |  |  |  |  |  |  |  |  |  |  |  |  |  | 132 |               |  |
| 116                                                                                        |  |  |  |  |  |  |  |  |  |  |  |  |  |  |  |  | 133 |               |  |
| 117                                                                                        |  |  |  |  |  |  |  |  |  |  |  |  |  |  |  |  | 134 |               |  |
| 118                                                                                        |  |  |  |  |  |  |  |  |  |  |  |  |  |  |  |  | 135 |               |  |
| 119                                                                                        |  |  |  |  |  |  |  |  |  |  |  |  |  |  |  |  | 136 |               |  |
| 120                                                                                        |  |  |  |  |  |  |  |  |  |  |  |  |  |  |  |  | 137 |               |  |
| 121                                                                                        |  |  |  |  |  |  |  |  |  |  |  |  |  |  |  |  | 138 |               |  |
| 122                                                                                        |  |  |  |  |  |  |  |  |  |  |  |  |  |  |  |  | 139 |               |  |
| 123                                                                                        |  |  |  |  |  |  |  |  |  |  |  |  |  |  |  |  | 140 |               |  |
| 124                                                                                        |  |  |  |  |  |  |  |  |  |  |  |  |  |  |  |  | 141 |               |  |
| 125                                                                                        |  |  |  |  |  |  |  |  |  |  |  |  |  |  |  |  | 142 |               |  |
| 126                                                                                        |  |  |  |  |  |  |  |  |  |  |  |  |  |  |  |  | 143 |               |  |
| 127                                                                                        |  |  |  |  |  |  |  |  |  |  |  |  |  |  |  |  | 144 |               |  |
| 128                                                                                        |  |  |  |  |  |  |  |  |  |  |  |  |  |  |  |  | 145 |               |  |
| 129                                                                                        |  |  |  |  |  |  |  |  |  |  |  |  |  |  |  |  | 146 |               |  |
| 130                                                                                        |  |  |  |  |  |  |  |  |  |  |  |  |  |  |  |  | 147 |               |  |
| 131                                                                                        |  |  |  |  |  |  |  |  |  |  |  |  |  |  |  |  | 148 |               |  |
| 132                                                                                        |  |  |  |  |  |  |  |  |  |  |  |  |  |  |  |  | 149 |               |  |
| 133                                                                                        |  |  |  |  |  |  |  |  |  |  |  |  |  |  |  |  | 150 |               |  |
| 134                                                                                        |  |  |  |  |  |  |  |  |  |  |  |  |  |  |  |  | 151 |               |  |
| 135                                                                                        |  |  |  |  |  |  |  |  |  |  |  |  |  |  |  |  | 152 |               |  |
| 136                                                                                        |  |  |  |  |  |  |  |  |  |  |  |  |  |  |  |  | 153 |               |  |
| 137                                                                                        |  |  |  |  |  |  |  |  |  |  |  |  |  |  |  |  | 154 |               |  |
| 138                                                                                        |  |  |  |  |  |  |  |  |  |  |  |  |  |  |  |  | 155 |               |  |
| 139                                                                                        |  |  |  |  |  |  |  |  |  |  |  |  |  |  |  |  | 156 |               |  |
| 140                                                                                        |  |  |  |  |  |  |  |  |  |  |  |  |  |  |  |  | 157 |               |  |
| 141                                                                                        |  |  |  |  |  |  |  |  |  |  |  |  |  |  |  |  | 158 |               |  |
| 142                                                                                        |  |  |  |  |  |  |  |  |  |  |  |  |  |  |  |  | 159 |               |  |
| 143                                                                                        |  |  |  |  |  |  |  |  |  |  |  |  |  |  |  |  | 160 |               |  |
| 144                                                                                        |  |  |  |  |  |  |  |  |  |  |  |  |  |  |  |  | 161 |               |  |
| 145                                                                                        |  |  |  |  |  |  |  |  |  |  |  |  |  |  |  |  | 162 |               |  |
| 146                                                                                        |  |  |  |  |  |  |  |  |  |  |  |  |  |  |  |  | 163 |               |  |
| 147                                                                                        |  |  |  |  |  |  |  |  |  |  |  |  |  |  |  |  | 164 |               |  |
| 148                                                                                        |  |  |  |  |  |  |  |  |  |  |  |  |  |  |  |  | 165 |               |  |
| 149                                                                                        |  |  |  |  |  |  |  |  |  |  |  |  |  |  |  |  | 166 |               |  |
| 150                                                                                        |  |  |  |  |  |  |  |  |  |  |  |  |  |  |  |  | 167 |               |  |
| 151                                                                                        |  |  |  |  |  |  |  |  |  |  |  |  |  |  |  |  | 168 |               |  |
| 152                                                                                        |  |  |  |  |  |  |  |  |  |  |  |  |  |  |  |  | 169 |               |  |
| 153                                                                                        |  |  |  |  |  |  |  |  |  |  |  |  |  |  |  |  | 170 |               |  |
| 154                                                                                        |  |  |  |  |  |  |  |  |  |  |  |  |  |  |  |  | 171 |               |  |
| 155                                                                                        |  |  |  |  |  |  |  |  |  |  |  |  |  |  |  |  | 172 |               |  |
| 156                                                                                        |  |  |  |  |  |  |  |  |  |  |  |  |  |  |  |  | 173 |               |  |
| 157                                                                                        |  |  |  |  |  |  |  |  |  |  |  |  |  |  |  |  | 174 |               |  |
| 158                                                                                        |  |  |  |  |  |  |  |  |  |  |  |  |  |  |  |  | 175 |               |  |
| 159                                                                                        |  |  |  |  |  |  |  |  |  |  |  |  |  |  |  |  | 176 |               |  |
| 160                                                                                        |  |  |  |  |  |  |  |  |  |  |  |  |  |  |  |  | 177 |               |  |
| 161                                                                                        |  |  |  |  |  |  |  |  |  |  |  |  |  |  |  |  | 178 |               |  |
| 162                                                                                        |  |  |  |  |  |  |  |  |  |  |  |  |  |  |  |  | 179 |               |  |
| 163                                                                                        |  |  |  |  |  |  |  |  |  |  |  |  |  |  |  |  | 180 |               |  |
| 164                                                                                        |  |  |  |  |  |  |  |  |  |  |  |  |  |  |  |  | 181 |               |  |
| 165                                                                                        |  |  |  |  |  |  |  |  |  |  |  |  |  |  |  |  | 182 |               |  |
| 166                                                                                        |  |  |  |  |  |  |  |  |  |  |  |  |  |  |  |  | 183 |               |  |
| 167                                                                                        |  |  |  |  |  |  |  |  |  |  |  |  |  |  |  |  | 184 |               |  |
| 168                                                                                        |  |  |  |  |  |  |  |  |  |  |  |  |  |  |  |  | 185 |               |  |
| 169                                                                                        |  |  |  |  |  |  |  |  |  |  |  |  |  |  |  |  | 186 |               |  |
| 170                                                                                        |  |  |  |  |  |  |  |  |  |  |  |  |  |  |  |  | 187 |               |  |
| 171                                                                                        |  |  |  |  |  |  |  |  |  |  |  |  |  |  |  |  | 188 |               |  |
| 172                                                                                        |  |  |  |  |  |  |  |  |  |  |  |  |  |  |  |  | 189 |               |  |
| 173                                                                                        |  |  |  |  |  |  |  |  |  |  |  |  |  |  |  |  | 190 |               |  |
| 174                                                                                        |  |  |  |  |  |  |  |  |  |  |  |  |  |  |  |  | 191 |               |  |
| 175                                                                                        |  |  |  |  |  |  |  |  |  |  |  |  |  |  |  |  | 192 |               |  |
| 176                                                                                        |  |  |  |  |  |  |  |  |  |  |  |  |  |  |  |  | 193 |               |  |
| 177                                                                                        |  |  |  |  |  |  |  |  |  |  |  |  |  |  |  |  | 194 |               |  |
| 178                                                                                        |  |  |  |  |  |  |  |  |  |  |  |  |  |  |  |  | 195 |               |  |
| 179                                                                                        |  |  |  |  |  |  |  |  |  |  |  |  |  |  |  |  | 196 |               |  |
| 180                                                                                        |  |  |  |  |  |  |  |  |  |  |  |  |  |  |  |  | 197 |               |  |
| 181                                                                                        |  |  |  |  |  |  |  |  |  |  |  |  |  |  |  |  | 198 |               |  |
| 182                                                                                        |  |  |  |  |  |  |  |  |  |  |  |  |  |  |  |  | 199 |               |  |
| 183                                                                                        |  |  |  |  |  |  |  |  |  |  |  |  |  |  |  |  | 200 |               |  |
| 184                                                                                        |  |  |  |  |  |  |  |  |  |  |  |  |  |  |  |  | 201 |               |  |
| 185                                                                                        |  |  |  |  |  |  |  |  |  |  |  |  |  |  |  |  | 202 |               |  |
| 186                                                                                        |  |  |  |  |  |  |  |  |  |  |  |  |  |  |  |  | 203 |               |  |
| 187                                                                                        |  |  |  |  |  |  |  |  |  |  |  |  |  |  |  |  | 204 |               |  |
| 188                                                                                        |  |  |  |  |  |  |  |  |  |  |  |  |  |  |  |  | 205 |               |  |
| 189                                                                                        |  |  |  |  |  |  |  |  |  |  |  |  |  |  |  |  | 206 |               |  |
| 190                                                                                        |  |  |  |  |  |  |  |  |  |  |  |  |  |  |  |  | 207 |               |  |
| 191                                                                                        |  |  |  |  |  |  |  |  |  |  |  |  |  |  |  |  | 208 |               |  |
| 192                                                                                        |  |  |  |  |  |  |  |  |  |  |  |  |  |  |  |  | 209 |               |  |
| 193                                                                                        |  |  |  |  |  |  |  |  |  |  |  |  |  |  |  |  | 210 |               |  |
| 194                                                                                        |  |  |  |  |  |  |  |  |  |  |  |  |  |  |  |  | 211 |               |  |
| 195                                                                                        |  |  |  |  |  |  |  |  |  |  |  |  |  |  |  |  | 212 |               |  |
| 196                                                                                        |  |  |  |  |  |  |  |  |  |  |  |  |  |  |  |  | 213 |               |  |
| 197                                                                                        |  |  |  |  |  |  |  |  |  |  |  |  |  |  |  |  | 214 |               |  |
| 198                                                                                        |  |  |  |  |  |  |  |  |  |  |  |  |  |  |  |  | 215 |               |  |
| 199                                                                                        |  |  |  |  |  |  |  |  |  |  |  |  |  |  |  |  | 216 |               |  |
| 200                                                                                        |  |  |  |  |  |  |  |  |  |  |  |  |  |  |  |  | 217 |               |  |
| 201                                                                                        |  |  |  |  |  |  |  |  |  |  |  |  |  |  |  |  | 218 |               |  |
| 202                                                                                        |  |  |  |  |  |  |  |  |  |  |  |  |  |  |  |  | 219 |               |  |
| 203                                                                                        |  |  |  |  |  |  |  |  |  |  |  |  |  |  |  |  | 220 |               |  |
| 204                                                                                        |  |  |  |  |  |  |  |  |  |  |  |  |  |  |  |  | 221 |               |  |
| 205                                                                                        |  |  |  |  |  |  |  |  |  |  |  |  |  |  |  |  | 222 |               |  |
| 206                                                                                        |  |  |  |  |  |  |  |  |  |  |  |  |  |  |  |  | 223 |               |  |
| 207                                                                                        |  |  |  |  |  |  |  |  |  |  |  |  |  |  |  |  | 224 |               |  |
| 208                                                                                        |  |  |  |  |  |  |  |  |  |  |  |  |  |  |  |  | 225 |               |  |
| 209                                                                                        |  |  |  |  |  |  |  |  |  |  |  |  |  |  |  |  | 226 |               |  |
| 210                                                                                        |  |  |  |  |  |  |  |  |  |  |  |  |  |  |  |  | 227 |               |  |
| 211                                                                                        |  |  |  |  |  |  |  |  |  |  |  |  |  |  |  |  | 228 |               |  |
| 212                                                                                        |  |  |  |  |  |  |  |  |  |  |  |  |  |  |  |  | 229 |               |  |
| 213                                                                                        |  |  |  |  |  |  |  |  |  |  |  |  |  |  |  |  | 230 |               |  |
| 214                                                                                        |  |  |  |  |  |  |  |  |  |  |  |  |  |  |  |  | 231 |               |  |
| 215                                                                                        |  |  |  |  |  |  |  |  |  |  |  |  |  |  |  |  | 232 |               |  |
| 216                                                                                        |  |  |  |  |  |  |  |  |  |  |  |  |  |  |  |  | 233 |               |  |
| 217                                                                                        |  |  |  |  |  |  |  |  |  |  |  |  |  |  |  |  | 234 |               |  |
| 218                                                                                        |  |  |  |  |  |  |  |  |  |  |  |  |  |  |  |  | 235 |               |  |
| 219                                                                                        |  |  |  |  |  |  |  |  |  |  |  |  |  |  |  |  | 236 |               |  |
| 220                                                                                        |  |  |  |  |  |  |  |  |  |  |  |  |  |  |  |  | 237 |               |  |
| 221                                                                                        |  |  |  |  |  |  |  |  |  |  |  |  |  |  |  |  | 238 |               |  |
| 222                                                                                        |  |  |  |  |  |  |  |  |  |  |  |  |  |  |  |  | 239 |               |  |
| 223                                                                                        |  |  |  |  |  |  |  |  |  |  |  |  |  |  |  |  | 240 |               |  |
| 224                                                                                        |  |  |  |  |  |  |  |  |  |  |  |  |  |  |  |  | 241 |               |  |
| 225                                                                                        |  |  |  |  |  |  |  |  |  |  |  |  |  |  |  |  | 242 |               |  |
| 226                                                                                        |  |  |  |  |  |  |  |  |  |  |  |  |  |  |  |  | 243 |               |  |
| 227                                                                                        |  |  |  |  |  |  |  |  |  |  |  |  |  |  |  |  | 244 |               |  |
| 228                                                                                        |  |  |  |  |  |  |  |  |  |  |  |  |  |  |  |  | 245 |               |  |
| 229                                                                                        |  |  |  |  |  |  |  |  |  |  |  |  |  |  |  |  | 246 |               |  |
| 230                                                                                        |  |  |  |  |  |  |  |  |  |  |  |  |  |  |  |  | 247 |               |  |
| 231                                                                                        |  |  |  |  |  |  |  |  |  |  |  |  |  |  |  |  | 248 |               |  |
| 232                                                                                        |  |  |  |  |  |  |  |  |  |  |  |  |  |  |  |  | 249 |               |  |
| 233                                                                                        |  |  |  |  |  |  |  |  |  |  |  |  |  |  |  |  | 250 |               |  |
| 234                                                                                        |  |  |  |  |  |  |  |  |  |  |  |  |  |  |  |  | 251 |               |  |
| 235                                                                                        |  |  |  |  |  |  |  |  |  |  |  |  |  |  |  |  | 252 |               |  |
| 236                                                                                        |  |  |  |  |  |  |  |  |  |  |  |  |  |  |  |  | 253 |               |  |
| 237                                                                                        |  |  |  |  |  |  |  |  |  |  |  |  |  |  |  |  | 254 |               |  |
| 238                                                                                        |  |  |  |  |  |  |  |  |  |  |  |  |  |  |  |  | 255 |               |  |
| 239                                                                                        |  |  |  |  |  |  |  |  |  |  |  |  |  |  |  |  | 256 |               |  |
| 240                                                                                        |  |  |  |  |  |  |  |  |  |  |  |  |  |  |  |  | 257 |               |  |
| 241                                                                                        |  |  |  |  |  |  |  |  |  |  |  |  |  |  |  |  | 258 |               |  |
| 242                                                                                        |  |  |  |  |  |  |  |  |  |  |  |  |  |  |  |  | 259 |               |  |
| 243                                                                                        |  |  |  |  |  |  |  |  |  |  |  |  |  |  |  |  | 260 |               |  |
| 244                                                                                        |  |  |  |  |  |  |  |  |  |  |  |  |  |  |  |  | 261 |               |  |
| 245                                                                                        |  |  |  |  |  |  |  |  |  |  |  |  |  |  |  |  | 262 |               |  |
| 246                                                                                        |  |  |  |  |  |  |  |  |  |  |  |  |  |  |  |  | 263 |               |  |
| 247                                                                                        |  |  |  |  |  |  |  |  |  |  |  |  |  |  |  |  | 264 |               |  |
| 248                                                                                        |  |  |  |  |  |  |  |  |  |  |  |  |  |  |  |  | 265 |               |  |
| 249                                                                                        |  |  |  |  |  |  |  |  |  |  |  |  |  |  |  |  | 266 |               |  |
| 250                                                                                        |  |  |  |  |  |  |  |  |  |  |  |  |  |  |  |  | 267 |               |  |
| 251                                                                                        |  |  |  |  |  |  |  |  |  |  |  |  |  |  |  |  | 268 |               |  |
| 252                                                                                        |  |  |  |  |  |  |  |  |  |  |  |  |  |  |  |  | 269 |               |  |
| 253                                                                                        |  |  |  |  |  |  |  |  |  |  |  |  |  |  |  |  | 270 |               |  |
| 254                                                                                        |  |  |  |  |  |  |  |  |  |  |  |  |  |  |  |  | 271 |               |  |
| 255                                                                                        |  |  |  |  |  |  |  |  |  |  |  |  |  |  |  |  | 272 |               |  |
| 256                                                                                        |  |  |  |  |  |  |  |  |  |  |  |  |  |  |  |  | 273 |               |  |
| 257                                                                                        |  |  |  |  |  |  |  |  |  |  |  |  |  |  |  |  | 274 |               |  |
| 258                                                                                        |  |  |  |  |  |  |  |  |  |  |  |  |  |  |  |  | 275 |               |  |
| 259                                                                                        |  |  |  |  |  |  |  |  |  |  |  |  |  |  |  |  | 276 |               |  |
| 260                                                                                        |  |  |  |  |  |  |  |  |  |  |  |  |  |  |  |  | 277 |               |  |
| 261                                                                                        |  |  |  |  |  |  |  |  |  |  |  |  |  |  |  |  | 278 |               |  |
| 262                                                                                        |  |  |  |  |  |  |  |  |  |  |  |  |  |  |  |  | 279 |               |  |
| 263                                                                                        |  |  |  |  |  |  |  |  |  |  |  |  |  |  |  |  | 280 |               |  |
| 264                                                                                        |  |  |  |  |  |  |  |  |  |  |  |  |  |  |  |  | 281 |               |  |
| 265                                                                                        |  |  |  |  |  |  |  |  |  |  |  |  |  |  |  |  | 282 |               |  |
| 266                                                                                        |  |  |  |  |  |  |  |  |  |  |  |  |  |  |  |  | 283 |               |  |
| 267                                                                                        |  |  |  |  |  |  |  |  |  |  |  |  |  |  |  |  | 284 |               |  |
| 268                                                                                        |  |  |  |  |  |  |  |  |  |  |  |  |  |  |  |  | 285 |               |  |
| 269                                                                                        |  |  |  |  |  |  |  |  |  |  |  |  |  |  |  |  | 286 |               |  |
| 270                                                                                        |  |  |  |  |  |  |  |  |  |  |  |  |  |  |  |  | 287 |               |  |
| 271                                                                                        |  |  |  |  |  |  |  |  |  |  |  |  |  |  |  |  | 288 |               |  |
| 272                                                                                        |  |  |  |  |  |  |  |  |  |  |  |  |  |  |  |  | 289 |               |  |
| 273                                                                                        |  |  |  |  |  |  |  |  |  |  |  |  |  |  |  |  | 290 |               |  |
| 274                                                                                        |  |  |  |  |  |  |  |  |  |  |  |  |  |  |  |  | 291 |               |  |
| 275                                                                                        |  |  |  |  |  |  |  |  |  |  |  |  |  |  |  |  | 292 |               |  |
| 276                                                                                        |  |  |  |  |  |  |  |  |  |  |  |  |  |  |  |  | 293 |               |  |
| 277                                                                                        |  |  |  |  |  |  |  |  |  |  |  |  |  |  |  |  | 294 |               |  |
| 278                                                                                        |  |  |  |  |  |  |  |  |  |  |  |  |  |  |  |  | 295 |               |  |
| 279                                                                                        |  |  |  |  |  |  |  |  |  |  |  |  |  |  |  |  | 296 |               |  |
| 280                                                                                        |  |  |  |  |  |  |  |  |  |  |  |  |  |  |  |  | 297 |               |  |
| 281                                                                                        |  |  |  |  |  |  |  |  |  |  |  |  |  |  |  |  | 298 |               |  |
| 282                                                                                        |  |  |  |  |  |  |  |  |  |  |  |  |  |  |  |  | 299 |               |  |
| 283                                                                                        |  |  |  |  |  |  |  |  |  |  |  |  |  |  |  |  | 300 |               |  |
| 284                                                                                        |  |  |  |  |  |  |  |  |  |  |  |  |  |  |  |  | 301 |               |  |
| 285                                                                                        |  |  |  |  |  |  |  |  |  |  |  |  |  |  |  |  | 302 |               |  |
| 286                                                                                        |  |  |  |  |  |  |  |  |  |  |  |  |  |  |  |  | 303 |               |  |
| 287                                                                                        |  |  |  |  |  |  |  |  |  |  |  |  |  |  |  |  | 304 |               |  |
| 288                                                                                        |  |  |  |  |  |  |  |  |  |  |  |  |  |  |  |  | 305 |               |  |
| 289                                                                                        |  |  |  |  |  |  |  |  |  |  |  |  |  |  |  |  | 306 |               |  |
| 290                                                                                        |  |  |  |  |  |  |  |  |  |  |  |  |  |  |  |  | 307 |               |  |
| 291                                                                                        |  |  |  |  |  |  |  |  |  |  |  |  |  |  |  |  | 308 |               |  |
| 292                                                                                        |  |  |  |  |  |  |  |  |  |  |  |  |  |  |  |  | 309 |               |  |
| 293                                                                                        |  |  |  |  |  |  |  |  |  |  |  |  |  |  |  |  | 310 |               |  |
| 294                                                                                        |  |  |  |  |  |  |  |  |  |  |  |  |  |  |  |  | 311 |               |  |
| 295                                                                                        |  |  |  |  |  |  |  |  |  |  |  |  |  |  |  |  | 312 |               |  |
| 296                                                                                        |  |  |  |  |  |  |  |  |  |  |  |  |  |  |  |  | 313 |               |  |
| 297                                                                                        |  |  |  |  |  |  |  |  |  |  |  |  |  |  |  |  | 314 |               |  |
| 298                                                                                        |  |  |  |  |  |  |  |  |  |  |  |  |  |  |  |  | 315 |               |  |
| 299                                                                                        |  |  |  |  |  |  |  |  |  |  |  |  |  |  |  |  | 316 |               |  |
| 300                                                                                        |  |  |  |  |  |  |  |  |  |  |  |  |  |  |  |  | 317 |               |  |
| 301                                                                                        |  |  |  |  |  |  |  |  |  |  |  |  |  |  |  |  | 318 |               |  |
| 302                                                                                        |  |  |  |  |  |  |  |  |  |  |  |  |  |  |  |  | 319 |               |  |
| 303                                                                                        |  |  |  |  |  |  |  |  |  |  |  |  |  |  |  |  | 320 |               |  |
| 304                                                                                        |  |  |  |  |  |  |  |  |  |  |  |  |  |  |  |  | 321 |               |  |
| 305                                                                                        |  |  |  |  |  |  |  |  |  |  |  |  |  |  |  |  | 322 |               |  |
| 306                                                                                        |  |  |  |  |  |  |  |  |  |  |  |  |  |  |  |  | 323 |               |  |
| 307                                                                                        |  |  |  |  |  |  |  |  |  |  |  |  |  |  |  |  | 324 |               |  |
| 308                                                                                        |  |  |  |  |  |  |  |  |  |  |  |  |  |  |  |  | 325 |               |  |
| 309                                                                                        |  |  |  |  |  |  |  |  |  |  |  |  |  |  |  |  | 326 |               |  |
| 310                                                                                        |  |  |  |  |  |  |  |  |  |  |  |  |  |  |  |  | 327 |               |  |
| 311                                                                                        |  |  |  |  |  |  |  |  |  |  |  |  |  |  |  |  | 328 |               |  |
| 312                                                                                        |  |  |  |  |  |  |  |  |  |  |  |  |  |  |  |  | 329 |               |  |
| 313                                                                                        |  |  |  |  |  |  |  |  |  |  |  |  |  |  |  |  | 330 |               |  |
| 314                                                                                        |  |  |  |  |  |  |  |  |  |  |  |  |  |  |  |  | 331 |               |  |
| 315                                                                                        |  |  |  |  |  |  |  |  |  |  |  |  |  |  |  |  | 332 |               |  |
| 316                                                                                        |  |  |  |  |  |  |  |  |  |  |  |  |  |  |  |  | 333 |               |  |
| 317                                                                                        |  |  |  |  |  |  |  |  |  |  |  |  |  |  |  |  | 334 |               |  |
| 318                                                                                        |  |  |  |  |  |  |  |  |  |  |  |  |  |  |  |  | 335 |               |  |
| 319                                                                                        |  |  |  |  |  |  |  |  |  |  |  |  |  |  |  |  | 336 |               |  |
| 320                                                                                        |  |  |  |  |  |  |  |  |  |  |  |  |  |  |  |  | 337 |               |  |
| 321                                                                                        |  |  |  |  |  |  |  |  |  |  |  |  |  |  |  |  | 338 |               |  |
| 322                                                                                        |  |  |  |  |  |  |  |  |  |  |  |  |  |  |  |  | 339 |               |  |
| 323                                                                                        |  |  |  |  |  |  |  |  |  |  |  |  |  |  |  |  | 340 |               |  |
| 324                                                                                        |  |  |  |  |  |  |  |  |  |  |  |  |  |  |  |  | 341 |               |  |
| 325                                                                                        |  |  |  |  |  |  |  |  |  |  |  |  |  |  |  |  | 342 |               |  |
| 326                                                                                        |  |  |  |  |  |  |  |  |  |  |  |  |  |  |  |  | 343 |               |  |
| 327                                                                                        |  |  |  |  |  |  |  |  |  |  |  |  |  |  |  |  | 344 |               |  |
| 328                                                                                        |  |  |  |  |  |  |  |  |  |  |  |  |  |  |  |  | 345 |               |  |
| 329                                                                                        |  |  |  |  |  |  |  |  |  |  |  |  |  |  |  |  | 346 |               |  |
| 330                                                                                        |  |  |  |  |  |  |  |  |  |  |  |  |  |  |  |  | 347 |               |  |
| 331                                                                                        |  |  |  |  |  |  |  |  |  |  |  |  |  |  |  |  | 348 |               |  |
| 332                                                                                        |  |  |  |  |  |  |  |  |  |  |  |  |  |  |  |  | 349 |               |  |
| 333                                                                                        |  |  |  |  |  |  |  |  |  |  |  |  |  |  |  |  | 350 |               |  |
| 334                                                                                        |  |  |  |  |  |  |  |  |  |  |  |  |  |  |  |  | 351 |               |  |
| 335                                                                                        |  |  |  |  |  |  |  |  |  |  |  |  |  |  |  |  | 352 |               |  |
| 336                                                                                        |  |  |  |  |  |  |  |  |  |  |  |  |  |  |  |  | 353 |               |  |
| 337                                                                                        |  |  |  |  |  |  |  |  |  |  |  |  |  |  |  |  | 354 |               |  |
| 338                                                                                        |  |  |  |  |  |  |  |  |  |  |  |  |  |  |  |  | 355 |               |  |
| 339                                                                                        |  |  |  |  |  |  |  |  |  |  |  |  |  |  |  |  | 356 |               |  |
| 340                                                                                        |  |  |  |  |  |  |  |  |  |  |  |  |  |  |  |  | 357 |               |  |
| 341                                                                                        |  |  |  |  |  |  |  |  |  |  |  |  |  |  |  |  | 358 |               |  |
| 342                                                                                        |  |  |  |  |  |  |  |  |  |  |  |  |  |  |  |  | 359 |               |  |
| 343                                                                                        |  |  |  |  |  |  |  |  |  |  |  |  |  |  |  |  | 360 |               |  |
| 344                                                                                        |  |  |  |  |  |  |  |  |  |  |  |  |  |  |  |  | 361 |               |  |
| 345                                                                                        |  |  |  |  |  |  |  |  |  |  |  |  |  |  |  |  | 362 |               |  |
| 346                                                                                        |  |  |  |  |  |  |  |  |  |  |  |  |  |  |  |  | 363 |               |  |
| 347                                                                                        |  |  |  |  |  |  |  |  |  |  |  |  |  |  |  |  | 364 |               |  |
| 348                                                                                        |  |  |  |  |  |  |  |  |  |  |  |  |  |  |  |  | 365 |               |  |
| 349                                                                                        |  |  |  |  |  |  |  |  |  |  |  |  |  |  |  |  | 366 |               |  |
| 350                                                                                        |  |  |  |  |  |  |  |  |  |  |  |  |  |  |  |  | 367 |               |  |
| 351                                                                                        |  |  |  |  |  |  |  |  |  |  |  |  |  |  |  |  | 368 |               |  |
| 352                                                                                        |  |  |  |  |  |  |  |  |  |  |  |  |  |  |  |  | 369 |               |  |
| 353                                                                                        |  |  |  |  |  |  |  |  |  |  |  |  |  |  |  |  | 370 |               |  |
| 354                                                                                        |  |  |  |  |  |  |  |  |  |  |  |  |  |  |  |  | 371 |               |  |
| 355                                                                                        |  |  |  |  |  |  |  |  |  |  |  |  |  |  |  |  | 372 |               |  |
| 356                                                                                        |  |  |  |  |  |  |  |  |  |  |  |  |  |  |  |  | 37  |               |  |

## Energy (First Pass)

|                                              |            |      |
|----------------------------------------------|------------|------|
| Reaction run between 0 to 70°C               | Green Flag | Tick |
| Reaction run between -20 to 0 or 70 to 140°C | Amber Flag | +    |
| Reaction run below -20 or above 140°C        | Red Flag   |      |

## Batch/flow

|       |            |      |
|-------|------------|------|
| Flow  | Green Flag | Tick |
| Batch | Amber Flag | +    |

|                                                          |            |   |
|----------------------------------------------------------|------------|---|
| Reaction run at reflux                                   | Red Flag   | + |
| Reaction run 5°C or more below the solvent boiling point | Green Flag |   |

## Work Up

|                                                               |            |   |
|---------------------------------------------------------------|------------|---|
| quenching                                                     | Green Flag | + |
| filtration                                                    |            |   |
| centrifugation                                                |            |   |
| crystallisation                                               |            |   |
| Low temperature distillation/evaporation/ sublimation (< 0°C) | Amber Flag | + |
| solvent exchange, quenching into aqueous solvent              | Red Flag   |   |
| chromatography/ion exchange                                   |            |   |
| high temperature multiple recrystallisation                   |            |   |

## Health & safety

|                            | Red Flag                     | Amber Flag                   | Green Flag                                                 | List substances and H-codes | List substances and H-codes           | List substances and H-codes |
|----------------------------|------------------------------|------------------------------|------------------------------------------------------------|-----------------------------|---------------------------------------|-----------------------------|
| Highly explosive           | H200, H201, H202, H203       | H205, H220, H224             | If no red or amber flagged H codes present then green flag |                             |                                       |                             |
| Explosive thermal runaway  | H230, H240, H250             | H241                         |                                                            |                             |                                       |                             |
| Toxic                      | H300, H310, H330             | H301, H311, H331             |                                                            |                             | SOCl <sub>2</sub> , CHCl <sub>3</sub> |                             |
| Long Term toxicity         | H340, H350, H360, H370, H372 | H341, H351, H361, H371, H373 |                                                            | DMF, CHCl <sub>3</sub>      | CHCl <sub>3</sub> , toluene           |                             |
| Environmental implications | H400, H410, H411, H420       | H401, H412                   |                                                            |                             | Toluene                               |                             |

| Use of chemicals of environmental concern                                            | List substances of very high concern |
|--------------------------------------------------------------------------------------|--------------------------------------|
| Chemical identified as Substances of Very High Concern by ChemSec which are utilised | Red Flag<br>DMF, CHCl <sub>3</sub>   |



[illegible]



| Critical elements |             |              |
|-------------------|-------------|--------------|
| Supply remaining  | Flag colour | Note element |
| 5-50 years        | Red Flag    |              |
| 50-500 years      | Amber Flag  |              |
| +500 years        | Green Flag  | +            |

|                                                                                                                                                                                    |  |  |  |  |  |  |  |  |  |  |  |  |  |  |  |  |  |
|------------------------------------------------------------------------------------------------------------------------------------------------------------------------------------|--|--|--|--|--|--|--|--|--|--|--|--|--|--|--|--|--|
| <div>Remaining years until depletion of known reserves (based on current rate of extraction)</div> <div><div>0-50 years</div><div>50-100 years</div><div>100-500 years</div></div> |  |  |  |  |  |  |  |  |  |  |  |  |  |  |  |  |  |
| 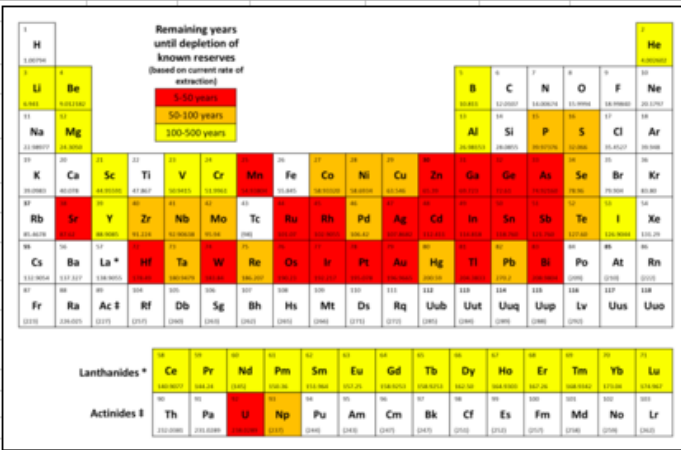                                                                                                 |  |  |  |  |  |  |  |  |  |  |  |  |  |  |  |  |  |

| Energy (First Pass)                          | Tick         |
|----------------------------------------------|--------------|
| Reaction run between 0 to 70°C               | Green Flag   |
| Reaction run between -20 to 0 or 70 to 140°C | Amber Flag + |
| Reaction run below -20 or above 140°C        | Red Flag     |

| Batch/flow | Tick         |
|------------|--------------|
| Flow       | Green Flag   |
| Batch      | Amber Flag + |

| Work Up                                                                                          | List         |
|--------------------------------------------------------------------------------------------------|--------------|
| quenching<br>filtration                                                                          | Green Flag + |
| centrifugation<br>crystallisation<br>Low temperature<br>distillation/evaporation/ sublimation (< |              |
| solvent exchange, quenching into aqueous solvent                                                 |              |
| chromatography/ion exchange<br>high temperature<br>multiple recrystallisation                    | Amber Flag   |
|                                                                                                  | Red Flag     |

| Health & safety            | List substances and H-codes           | List substances and H-codes             | List substances and H-codes |
|----------------------------|---------------------------------------|-----------------------------------------|-----------------------------|
| Highly explosive           | Red Flag H200, H201, H202, H203       | Amber Flag H205, H220, H224             | Green Flag                  |
| Explosive thermal runaway  | Red Flag H230, H240, H250             | Amber Flag H241                         | Green Flag                  |
| Toxic                      | Red Flag H300, H310, H330             | Amber Flag H301, H311, H331,            | Green Flag                  |
| Long Term toxicity         | Red Flag H340, H350, H360, H370, H372 | Amber Flag H341, H351, H361, H371, H373 | Green Flag                  |
| Environmental implications | Red Flag H400, H410, H411, H420       | Amber Flag H401, H412                   | Green Flag                  |

| Use of chemicals of environmental concern                                            |          | List substances of very high conce |
|--------------------------------------------------------------------------------------|----------|------------------------------------|
| Chemical identified as Substances of Very High Concern by ChemSec which are utilised | Red Flag | DMF                                |



[illegible]



| Supply remaining | Flag colour | Note element |
|------------------|-------------|--------------|
| 5-50 years       | Red Flag    |              |
| 50-500 years     | Amber Flag  |              |
| +500 years       | Green Flag  | +            |

|   |                                                                                            |    |      |    |    |    |    |    |    |    |    |     |     |     |     |     |     |    |    |    |
|---|--------------------------------------------------------------------------------------------|----|------|----|----|----|----|----|----|----|----|-----|-----|-----|-----|-----|-----|----|----|----|
| 1 | Remaining years until depletion of known reserves<br>(based on current rate of extraction) |    |      |    |    |    |    |    |    |    |    |     |     |     |     |     | 18  |    |    |    |
| 1 | H                                                                                          |    |      |    |    |    |    |    |    |    |    |     |     |     |     |     |     | He |    |    |
| 2 | Li                                                                                         | Be |      |    |    |    |    |    |    |    |    |     |     |     | B   | C   | N   | O  | F  | Ne |
| 3 | Na                                                                                         | Mg |      |    |    |    |    |    |    |    |    |     |     |     | Al  | Si  | P   | S  | Cl | Ar |
| 4 | K                                                                                          | Ca | Sc   | Ti | V  | Cr | Mn | Fe | Co | Ni | Cu | Zn  | Ga  | Ge  | As  | Se  | Br  | Kr |    |    |
| 5 | Rb                                                                                         | Sr | Y    | Zr | Nb | Mo | Tc | Ru | Rh | Pd | Ag | Cd  | In  | Sn  | Sb  | Te  | I   | Xe |    |    |
| 6 | Cs                                                                                         | Ba | La * | Hf | Ta | W  | Re | Os | Ir | Pt | Au | Hg  | Tl  | Pb  | Bi  | Po  | At  | Rn |    |    |
| 7 | Fr                                                                                         | Ra | Ac † | Rf | Db | Sg | Bh | Hs | Mt | Ds | Rg | Uub | Uuq | Uup | Uuh | Uus | Uuo |    |    |    |

0-50 years  
50-100 years  
100-500 years

0102030405060708090100

Lanthanides \*

Actinides †

|    |    |    |    |    |    |    |    |    |    |    |    |    |    |
|----|----|----|----|----|----|----|----|----|----|----|----|----|----|
| Ce | Pr | Nd | Pm | Sm | Eu | Gd | Tb | Dy | Ho | Er | Tm | Yb | Lu |
| Th | Pa | U  | Np | Pu | Am | Cm | Bk | Cf | Es | Fm | Md | No | Lr |

|                                              |            |
|----------------------------------------------|------------|
| Reaction run between 0 to 70°C               | Green Flag |
| Reaction run between -20 to 0 or 70 to 140°C | Amber Flag |
| Reaction run below -20 or above 140°C        | Red Flag   |

|             |  |                                                          |            |  |             |
|-------------|--|----------------------------------------------------------|------------|--|-------------|
| <b>Tick</b> |  |                                                          |            |  | <b>Tick</b> |
|             |  | Reaction run at reflux                                   | Red Flag   |  | +           |
| +           |  | Reaction run 5°C or more below the solvent boiling point | Green Flag |  |             |
|             |  |                                                          |            |  |             |

|       |            |
|-------|------------|
| Flow  | Green Flag |
| Batch | Amber Flag |

| Tick | Work Up    | List |
|------|------------|------|
|      | quenching  |      |
| +    | filtration |      |

|  |  |                                                                                                         |            |   |
|--|--|---------------------------------------------------------------------------------------------------------|------------|---|
|  |  | centrifugation<br>crystallisation<br>Low temperature<br>distillation/evaporation/ sublimation (< 100°C) | Green Flag | + |
|  |  | solvent exchange, quenching into aqueous solvent                                                        | Amber Flag |   |
|  |  | chromatography/ion exchange<br>high temperature<br>multiple recrystallisation                           | Red Flag   |   |

|                                   |                              |
|-----------------------------------|------------------------------|
|                                   | <b>Red Flag</b>              |
| <b>Highly explosive</b>           | H200, H201, H202, H203       |
| <b>Explosive thermal runaway</b>  | H230, H240, H250             |
| <b>Toxic</b>                      | H300, H310, H330             |
| <b>Long Term toxicity</b>         | H340, H350, H360, H370, H372 |
| <b>Environmental implications</b> | H400, H410, H411, H420       |

|                              |                                                            |  |                                    |                                    |                                    |
|------------------------------|------------------------------------------------------------|--|------------------------------------|------------------------------------|------------------------------------|
|                              |                                                            |  | <b>List substances and H-codes</b> | <b>List substances and H-codes</b> | <b>List substances and H-codes</b> |
| <b>Amber Flag</b>            | <b>Green Flag</b>                                          |  |                                    |                                    |                                    |
| H205, H220, H224             | If no red or amber flagged H codes present then green flag |  |                                    |                                    |                                    |
| H241                         |                                                            |  |                                    |                                    |                                    |
| H301, H311, H331,            |                                                            |  |                                    |                                    |                                    |
| H341, H351, H361, H371, H373 |                                                            |  | <b>THF</b>                         |                                    |                                    |
| H401, H412                   |                                                            |  |                                    |                                    |                                    |

Chemical identified as Substances of Very High Concern  
ChemSec which are utilised

|            |                                      |  |  |  |  |  |  |
|------------|--------------------------------------|--|--|--|--|--|--|
| Concern    | Most substances of very high concern |  |  |  |  |  |  |
| Concern by | Red Flag                             |  |  |  |  |  |  |



## This work

| Summary of First Pass Metrics Toolkit |                                    |          |         |         |          |          |         |          |                  |                           |                               |          |                  |          |                |              |                               |          |
|---------------------------------------|------------------------------------|----------|---------|---------|----------|----------|---------|----------|------------------|---------------------------|-------------------------------|----------|------------------|----------|----------------|--------------|-------------------------------|----------|
| Yield, AE, RME, MI/PMI and OE         |                                    |          |         |         |          |          |         |          |                  |                           |                               |          |                  |          |                |              |                               |          |
| Stoichiometry                         | Reactant (Limiting Reactant First) | Mass (g) | MW      | Mol     | Catalyst | Mass (g) | Reagent | Mass (g) | Reaction solvent | Volume (cm <sup>3</sup> ) | Density (g ml <sup>-1</sup> ) | Mass (g) | Work up chemical | Mass (g) | Workup solvent | Volume (cm3) | Density (g ml <sup>-1</sup> ) | Mass (g) |
| 1                                     | Amine                              | 0.43     | 277.00  | 0.00156 |          |          |         |          | EtOAc            | 0.51                      | 0.90                          | 0.46     |                  |          | Water          | 140.00       | 1.00                          | 140.00   |
| 1                                     | 4-hydroxymethyl benzoic acid       | 0.25     | 152.00  | 0.00163 |          |          |         |          | DMI              | 1.30                      | 1.15                          | 1.50     |                  |          |                |              |                               | 0.00     |
| 1                                     | EDC HCl                            | 0.33     | 191.70  | 0.00174 |          |          |         |          |                  |                           |                               | 0.00     |                  |          |                |              |                               | 0.00     |
| 2                                     | N-methylpiperazine                 | 1.46     | 100.17  | 0.01460 |          |          |         |          |                  |                           |                               | 0.00     |                  |          |                |              |                               | 0.00     |
| 1                                     | TFFH                               | 0.77     | 264.12  | 0.00292 |          |          |         |          |                  |                           |                               | 0.00     |                  |          |                |              |                               | 0.00     |
| 1                                     | K <sub>2</sub> HPO <sub>4</sub>    | 0.64     | 174.20  | 0.00365 |          |          |         |          |                  |                           |                               | 0.00     |                  |          |                |              |                               | 0.00     |
|                                       |                                    |          |         |         |          |          |         |          |                  |                           |                               | 0.00     |                  |          |                |              |                               | 0.00     |
|                                       | Total                              | 3.88     | 1259.35 |         |          | 0.00     |         | 0.00     |                  |                           |                               | 1.96     |                  | 0.00     |                |              |                               | 140.00   |
|                                       |                                    |          |         |         |          |          |         |          |                  | Flag                      |                               |          |                  |          |                |              |                               |          |
|                                       |                                    |          |         |         |          |          |         |          |                  | Yield                     | 86.0                          | 86.0     |                  |          |                |              |                               |          |
|                                       |                                    |          |         |         |          |          |         |          |                  | Conversion                | 100.0                         | 100.0    |                  |          |                |              |                               |          |
|                                       |                                    |          |         |         |          |          |         |          |                  | Selectivity               | 86.0                          | 86.0     |                  |          |                |              |                               |          |
|                                       |                                    |          |         |         |          |          |         |          |                  | AE                        | 39.1                          |          |                  |          |                |              |                               |          |
|                                       |                                    |          |         |         |          |          |         |          |                  | RME                       | 17.0                          | OE       | 43.4             |          |                |              |                               |          |
|                                       |                                    |          |         |         |          |          |         |          |                  | PMI total                 | 221.0                         |          |                  |          |                |              |                               |          |
|                                       |                                    |          |         |         |          |          |         |          |                  | PMI Reaction              | 8.9                           |          |                  |          |                |              |                               |          |
|                                       |                                    |          |         |         |          |          |         |          |                  | reagents, catalyst        | 5.9                           |          |                  |          |                |              |                               |          |
|                                       |                                    |          |         |         |          |          |         |          |                  | PMI reaction solvents     | 3.0                           |          |                  |          |                |              |                               |          |
|                                       |                                    |          |         |         |          |          |         |          |                  | PMI Workup                | 212.1                         |          |                  |          |                |              |                               |          |
|                                       |                                    |          |         |         |          |          |         |          |                  | PMI Workup chemical       | 0.0                           |          |                  |          |                |              |                               |          |
|                                       |                                    |          |         |         |          |          |         |          |                  | PMI workup solvents       | 212.1                         |          |                  |          |                |              |                               |          |
|                                       |                                    |          |         |         |          |          |         |          |                  |                           |                               |          |                  |          |                |              |                               |          |
|                                       |                                    |          |         |         |          |          |         |          |                  |                           |                               |          |                  |          |                |              |                               |          |
|                                       |                                    |          |         |         |          |          |         |          |                  |                           |                               |          |                  |          |                |              |                               |          |
|                                       |                                    |          |         |         |          |          |         |          |                  |                           |                               |          |                  |          |                |              |                               |          |
|                                       |                                    |          |         |         |          |          |         |          |                  |                           |                               |          |                  |          |                |              |                               |          |
|                                       |                                    |          |         |         |          |          |         |          |                  |                           |                               |          |                  |          |                |              |                               |          |
|                                       |                                    |          |         |         |          |          |         |          |                  |                           |                               |          |                  |          |                |              |                               |          |
|                                       |                                    |          |         |         |          |          |         |          |                  |                           |                               |          |                  |          |                |              |                               |          |
|                                       |                                    |          |         |         |          |          |         |          |                  |                           |                               |          |                  |          |                |              |                               |          |
|                                       |                                    |          |         |         |          |          |         |          |                  |                           |                               |          |                  |          |                |              |                               |          |
|                                       |                                    |          |         |         |          |          |         |          |                  |                           |                               |          |                  |          |                |              |                               |          |
|                                       |                                    |          |         |         |          |          |         |          |                  |                           |                               |          |                  |          |                |              |                               |          |
|                                       |                                    |          |         |         |          |          |         |          |                  |                           |                               |          |                  |          |                |              |                               |          |
|                                       |                                    |          |         |         |          |          |         |          |                  |                           |                               |          |                  |          |                |              |                               |          |
|                                       |                                    |          |         |         |          |          |         |          |                  |                           |                               |          |                  |          |                |              |                               |          |
|                                       |                                    |          |         |         |          |          |         |          |                  |                           |                               |          |                  |          |                |              |                               |          |
|                                       |                                    |          |         |         |          |          |         |          |                  |                           |                               |          |                  |          |                |              |                               |          |
|                                       |                                    |          |         |         |          |          |         |          |                  |                           |                               |          |                  |          |                |              |                               |          |
|                                       |                                    |          |         |         |          |          |         |          |                  |                           |                               |          |                  |          |                |              |                               |          |
|                                       |                                    |          |         |         |          |          |         |          |                  |                           |                               |          |                  |          |                |              |                               |          |
|                                       |                                    |          |         |         |          |          |         |          |                  |                           |                               |          |                  |          |                |              |                               |          |
|                                       |                                    |          |         |         |          |          |         |          |                  |                           |                               |          |                  |          |                |              |                               |          |
|                                       |                                    |          |         |         |          |          |         |          |                  |                           |                               |          |                  |          |                |              |                               |          |
|                                       |                                    |          |         |         |          |          |         |          |                  |                           |                               |          |                  |          |                |              |                               |          |
|                                       |                                    |          |         |         |          |          |         |          |                  |                           |                               |          |                  |          |                |              |                               |          |
|                                       |                                    |          |         |         |          |          |         |          |                  |                           |                               |          |                  |          |                |              |                               |          |
|                                       |                                    |          |         |         |          |          |         |          |                  |                           |                               |          |                  |          |                |              |                               |          |
|                                       |                                    |          |         |         |          |          |         |          |                  |                           |                               |          |                  |          |                |              |                               |          |
|                                       |                                    |          |         |         |          |          |         |          |                  |                           |                               |          |                  |          |                |              |                               |          |
|                                       |                                    |          |         |         |          |          |         |          |                  |                           |                               |          |                  |          |                |              |                               |          |
|                                       |                                    |          |         |         |          |          |         |          |                  |                           |                               |          |                  |          |                |              |                               |          |
|                                       |                                    |          |         |         |          |          |         |          |                  |                           |                               |          |                  |          |                |              |                               |          |
|                                       |                                    |          |         |         |          |          |         |          |                  |                           |                               |          |                  |          |                |              |                               |          |
|                                       |                                    |          |         |         |          |          |         |          |                  |                           |                               |          |                  |          |                |              |                               |          |
|                                       |                                    |          |         |         |          |          |         |          |                  |                           |                               |          |                  |          |                |              |                               |          |
|                                       |                                    |          |         |         |          |          |         |          |                  |                           |                               |          |                  |          |                |              |                               |          |
|                                       |                                    |          |         |         |          |          |         |          |                  |                           |                               |          |                  |          |                |              |                               |          |
|                                       |                                    |          |         |         |          |          |         |          |                  |                           |                               |          |                  |          |                |              |                               |          |
|                                       |                                    |          |         |         |          |          |         |          |                  |                           |                               |          |                  |          |                |              |                               |          |
|                                       |                                    |          |         |         |          |          |         |          |                  |                           |                               |          |                  |          |                |              |                               |          |
|                                       |                                    |          |         |         |          |          |         |          |                  |                           |                               |          |                  |          |                |              |                               |          |
|                                       |                                    |          |         |         |          |          |         |          |                  |                           |                               |          |                  |          |                |              |                               |          |
|                                       |                                    |          |         |         |          |          |         |          |                  |                           |                               |          |                  |          |                |              |                               |          |
|                                       |                                    |          |         |         |          |          |         |          |                  |                           |                               |          |                  |          |                |              |                               |          |
|                                       |                                    |          |         |         |          |          |         |          |                  |                           |                               |          |                  |          |                |              |                               |          |
|                                       |                                    |          |         |         |          |          |         |          |                  |                           |                               |          |                  |          |                |              |                               |          |
|                                       |                                    |          |         |         |          |          |         |          |                  |                           |                               |          |                  |          |                |              |                               |          |
|                                       |                                    |          |         |         |          |          |         |          |                  |                           |                               |          |                  |          |                |              |                               |          |
|                                       |                                    |          |         |         |          |          |         |          |                  |                           |                               |          |                  |          |                |              |                               |          |
|                                       |                                    |          |         |         |          |          |         |          |                  |                           |                               |          |                  |          |                |              |                               |          |
|                                       |                                    |          |         |         |          |          |         |          |                  |                           |                               |          |                  |          |                |              |                               |          |
|                                       |                                    |          |         |         |          |          |         |          |                  |                           |                               |          |                  |          |                |              |                               |          |
|                                       |                                    |          |         |         |          |          |         |          |                  |                           |                               |          |                  |          |                |              |                               |          |
|                                       |                                    |          |         |         |          |          |         |          |                  |                           |                               |          |                  |          |                |              |                               |          |
|                                       |                                    |          |         |         |          |          |         |          |                  |                           |                               |          |                  |          |                |              |                               |          |
|                                       |                                    |          |         |         |          |          |         |          |                  |                           |                               |          |                  |          |                |              |                               |          |
|                                       |                                    |          |         |         |          |          |         |          |                  |                           |                               |          |                  |          |                |              |                               |          |
|                                       |                                    |          |         |         |          |          |         |          |                  |                           |                               |          |                  |          |                |              |                               |          |
|                                       |                                    |          |         |         |          |          |         |          |                  |                           |                               |          |                  |          |                |              |                               |          |
|                                       |                                    |          |         |         |          |          |         |          |                  |                           |                               |          |                  |          |                |              |                               |          |
|                                       |                                    |          |         |         |          |          |         |          |                  |                           |                               |          |                  |          |                |              |                               |          |
|                                       |                                    |          |         |         |          |          |         |          |                  |                           |                               |          |                  |          |                |              |                               |          |
|                                       |                                    |          |         |         |          |          |         |          |                  |                           |                               |          |                  |          |                |              |                               |          |
|                                       |                                    |          |         |         |          |          |         |          |                  |                           |                               |          |                  |          |                |              |                               |          |
|                                       |                                    |          |         |         |          |          |         |          |                  |                           |                               |          |                  |          |                |              |                               |          |
|                                       |                                    |          |         |         |          |          |         |          |                  |                           |                               |          |                  |          |                |              |                               |          |
|                                       |                                    |          |         |         |          |          |         |          |                  |                           |                               |          |                  |          |                |              |                               |          |
|                                       |                                    |          |         |         |          |          |         |          |                  |                           |                               |          |                  |          |                |              |                               |          |
|                                       |                                    |          |         |         |          |          |         |          |                  |                           |                               |          |                  |          |                |              |                               |          |
|                                       |                                    |          |         |         |          |          |         |          |                  |                           |                               |          |                  |          |                |              |                               |          |
|                                       |                                    |          |         |         |          |          |         |          |                  |                           |                               |          |                  |          |                |              |                               |          |
|                                       |                                    |          |         |         |          |          |         |          |                  |                           |                               |          |                  |          |                |              |                               |          |
|                                       |                                    |          |         |         |          |          |         |          |                  |                           |                               |          |                  |          |                |              |                               |          |
|                                       |                                    |          |         |         |          |          |         |          |                  |                           |                               |          |                  |          |                |              |                               |          |
|                                       |                                    |          |         |         |          |          |         |          |                  |                           |                               |          |                  |          |                |              |                               |          |
|                                       |                                    |          |         |         |          |          |         |          |                  |                           |                               |          |                  |          |                |              |                               |          |
|                                       |                                    |          |         |         |          |          |         |          |                  |                           |                               |          |                  |          |                |              |                               |          |
|                                       |                                    |          |         |         |          |          |         |          |                  |                           |                               |          |                  |          |                |              |                               |          |
|                                       |                                    |          |         |         |          |          |         |          |                  |                           |                               |          |                  |          |                |              |                               |          |
|                                       |                                    |          |         |         |          |          |         |          |                  |                           |                               |          |                  |          |                |              |                               |          |
|                                       |                                    |          |         |         |          |          |         |          |                  |                           |                               |          |                  |          |                |              |                               |          |
|                                       |                                    |          |         |         |          |          |         |          |                  |                           |                               |          |                  |          |                |              |                               |          |
|                                       |                                    |          |         |         |          |          |         |          |                  |                           |                               |          |                  |          |                |              |                               |          |
|                                       |                                    |          |         |         |          |          |         |          |                  |                           |                               |          |                  |          |                |              |                               |          |
|                                       |                                    |          |         |         |          |          |         |          |                  |                           |                               |          |                  |          |                |              |                               |          |
|                                       |                                    |          |         |         |          |          |         |          |                  |                           |                               |          |                  |          |                |              |                               |          |
|                                       |                                    |          |         |         |          |          |         |          |                  |                           |                               |          |                  |          |                |              |                               |          |
|                                       |                                    |          |         |         |          |          |         |          |                  |                           |                               |          |                  |          |                |              |                               |          |
|                                       |                                    |          |         |         |          |          |         |          |                  |                           |                               |          |                  |          |                |              |                               |          |
|                                       |                                    |          |         |         |          |          |         |          |                  |                           |                               |          |                  |          |                |              |                               |          |
|                                       |                                    |          |         |         |          |          |         |          |                  |                           |                               |          |                  |          |                |              |                               |          |
|                                       |                                    |          |         |         |          |          |         |          |                  |                           |                               |          |                  |          |                |              |                               |          |
|                                       |                                    |          |         |         |          |          |         |          |                  |                           |                               |          |                  |          |                |              |                               |          |
|                                       |                                    |          |         |         |          |          |         |          |                  |                           |                               |          |                  |          |                |              |                               |          |
|                                       |                                    |          |         |         |          |          |         |          |                  |                           |                               |          |                  |          |                |              |                               |          |
|                                       |                                    |          |         |         |          |          |         |          |                  |                           |                               |          |                  |          |                |              |                               |          |
|                                       |                                    |          |         |         |          |          |         |          |                  |                           |                               |          |                  |          |                |              |                               |          |
|                                       |                                    |          |         |         |          |          |         |          |                  |                           |                               |          |                  |          |                |              |                               |          |
|                                       |                                    |          |         |         |          |          |         |          |                  |                           |                               |          |                  |          |                |              |                               |          |
|                                       |                                    |          |         |         |          |          |         |          |                  |                           |                               |          |                  |          |                |              |                               |          |
|                                       |                                    |          |         |         |          |          |         |          |                  |                           |                               |          |                  |          |                |              |                               |          |
|                                       |                                    |          |         |         |          |          |         |          |                  |                           |                               |          |                  |          |                |              |                               |          |
|                                       |                                    |          |         |         |          |          |         |          |                  |                           |                               |          |                  |          |                |              |                               |          |
|                                       |                                    |          |         |         |          |          |         |          |                  |                           |                               |          |                  |          |                |              |                               |          |
|                                       |                                    |          |         |         |          |          |         |          |                  |                           |                               |          |                  |          |                |              |                               |          |
|                                       |                                    |          |         |         |          |          |         |          |                  |                           |                               |          |                  |          |                |              |                               |          |
|                                       |                                    |          |         |         |          |          |         |          |                  |                           |                               |          |                  |          |                |              |                               |          |
|                                       |                                    |          |         |         |          |          |         |          |                  |                           |                               |          |                  |          |                |              |                               |          |
|                                       |                                    |          |         |         |          |          |         |          |                  |                           |                               |          |                  |          |                |              |                               |          |
|                                       |                                    |          |         |         |          |          |         |          |                  |                           |                               |          |                  |          |                |              |                               |          |
|                                       |                                    |          |         |         |          |          |         |          |                  |                           |                               |          |                  |          |                |              |                               |          |
|                                       |                                    |          |         |         |          |          |         |          |                  |                           |                               |          |                  |          |                |              |                               |          |
|                                       |                                    |          |         |         |          |          |         |          |                  |                           |                               |          |                  |          |                |              |                               |          |
|                                       |                                    |          |         |         |          |          |         |          |                  |                           |                               |          |                  |          |                |              |                               |          |
|                                       |                                    |          |         |         |          |          |         |          |                  |                           |                               |          |                  |          |                |              |                               |          |
|                                       |                                    |          |         |         |          |          |         |          |                  |                           |                               |          |                  |          |                |              |                               |          |
|                                       |                                    |          |         |         |          |          |         |          |                  |                           |                               |          |                  |          |                |              |                               |          |
|                                       |                                    |          |         |         |          |          |         |          |                  |                           |                               |          |                  |          |                |              |                               |          |
|                                       |                                    |          |         |         |          |          |         |          |                  |                           |                               |          |                  |          |                |              |                               |          |
|                                       |                                    |          |         |         |          |          |         |          |                  |                           |                               |          |                  |          |                |              |                               |          |
|                                       |                                    |          |         |         |          |          |         |          |                  |                           |                               |          |                  |          |                |              |                               |          |
|                                       |                                    |          |         |         |          |          |         |          |                  |                           |                               |          |                  |          |                |              |                               |          |
|                                       |                                    |          |         |         |          |          |         |          |                  |                           |                               |          |                  |          |                |              |                               |          |
|                                       |                                    |          |         |         |          |          |         |          |                  |                           |                               |          |                  |          |                |              |                               |          |
|                                       |                                    |          |         |         |          |          |         |          |                  |                           |                               |          |                  |          |                |              |                               |          |
|                                       |                                    |          |         |         |          |          |         |          |                  |                           |                               |          |                  |          |                |              |                               |          |
|                                       |                                    |          |         |         |          |          |         |          |                  |                           |                               |          |                  |          |                |              |                               |          |
|                                       |                                    |          |         |         |          |          |         |          |                  |                           |                               |          |                  |          |                |              |                               |          |
|                                       |                                    |          |         |         |          |          |         |          |                  |                           |                               |          |                  |          |                |              |                               |          |
|                                       |                                    |          |         |         |          |          |         |          |                  |                           |                               |          |                  |          |                |              |                               |          |
|                                       |                                    |          |         |         |          |          |         |          |                  |                           |                               |          |                  |          |                |              |                               |          |
|                                       |                                    |          |         |         |          |          |         |          |                  |                           |                               |          |                  |          |                |              |                               |          |
|                                       |                                    |          |         |         |          |          |         |          |                  |                           |                               |          |                  |          |                |              |                               |          |
|                                       |                                    |          |         |         |          |          |         |          |                  |                           |                               |          |                  |          |                |              |                               |          |
|                                       |                                    |          |         |         |          |          |         |          |                  |                           |                               |          |                  |          |                |              |                               |          |
|                                       |                                    |          |         |         |          |          |         |          |                  |                           |                               |          |                  |          |                |              |                               |          |
|                                       |                                    |          |         |         |          |          |         |          |                  |                           |                               |          |                  |          |                |              |                               |          |
|                                       |                                    |          |         |         |          |          |         |          |                  |                           |                               |          |                  |          |                |              |                               |          |
|                                       |                                    |          |         |         |          |          |         |          |                  |                           |                               |          |                  |          |                |              |                               |          |
|                                       |                                    |          |         |         |          |          |         |          |                  |                           |                               |          |                  |          |                |              |                               |          |
|                                       |                                    |          |         |         |          |          |         |          |                  |                           |                               |          |                  |          |                |              |                               |          |
|                                       |                                    |          |         |         |          |          |         |          |                  |                           |                               |          |                  |          |                |              |                               |          |
|                                       |                                    |          |         |         |          |          |         |          |                  |                           |                               |          |                  |          |                |              |                               |          |
|                                       |                                    |          |         |         |          |          |         |          |                  |                           |                               |          |                  |          |                |              |                               |          |
|                                       |                                    |          |         |         |          |          |         |          |                  |                           |                               |          |                  |          |                |              |                               |          |
|                                       |                                    |          |         |         |          |          |         |          |                  |                           |                               |          |                  |          |                |              |                               |          |
|                                       |                                    |          |         |         |          |          |         |          |                  |                           |                               |          |                  |          |                |              |                               |          |
|                                       |                                    |          |         |         |          |          |         |          |                  |                           |                               |          |                  |          |                |              |                               |          |
|                                       |                                    |          |         |         |          |          |         |          |                  |                           |                               |          |                  |          |                |              |                               |          |
|                                       |                                    |          |         |         |          |          |         |          |                  |                           |                               |          |                  |          |                |              |                               |          |
|                                       |                                    |          |         |         |          |          |         |          |                  |                           |                               |          |                  |          |                |              |                               |          |
|                                       |                                    |          |         |         |          |          |         |          |                  |                           |                               |          |                  |          |                |              |                               |          |
|                                       |                                    |          |         |         |          |          |         |          |                  |                           |                               |          |                  |          |                |              |                               |          |
|                                       |                                    |          |         |         |          |          |         |          |                  |                           |                               |          |                  |          |                |              |                               |          |
|                                       |                                    |          |         |         |          |          |         |          |                  |                           |                               |          |                  |          |                |              |                               |          |
|                                       |                                    |          |         |         |          |          |         |          |                  |                           |                               |          |                  |          |                |              |                               |          |
|                                       |                                    |          |         |         |          |          |         |          |                  |                           |                               |          |                  |          |                |              |                               |          |
|                                       |                                    |          |         |         |          |          |         |          |                  |                           |                               |          |                  |          |                |              |                               |          |
|                                       |                                    |          |         |         |          |          |         |          |                  |                           |                               |          |                  |          |                |              |                               |          |
|                                       |                                    |          |         |         |          |          |         |          |                  |                           |                               |          |                  |          |                |              |                               |          |
|                                       |                                    |          |         |         |          |          |         |          |                  |                           |                               |          |                  |          |                |              |                               |          |
|                                       |                                    |          |         |         |          |          |         |          |                  |                           |                               |          |                  |          |                |              |                               |          |
|                                       |                                    |          |         |         |          |          |         |          |                  |                           |                               |          |                  |          |                |              |                               |          |
|                                       |                                    |          |         |         |          |          |         |          |                  |                           |                               |          |                  |          |                |              |                               |          |
|                                       |                                    |          |         |         |          |          |         |          |                  |                           |                               |          |                  |          |                |              |                               |          |
|                                       |                                    |          |         |         |          |          |         |          |                  |                           |                               |          |                  |          |                |              |                               |          |
|                                       |                                    |          |         |         |          |          |         |          |                  |                           |                               |          |                  |          |                |              |                               |          |
|                                       |                                    |          |         |         |          |          |         |          |                  |                           |                               |          |                  |          |                |              |                               |          |
|                                       |                                    |          |         |         |          |          |         |          |                  |                           |                               |          |                  |          |                |              |                               |          |
|                                       |                                    |          |         |         |          |          |         |          |                  |                           |                               |          |                  |          |                |              |                               |          |



| Critical elements |             |              |
|-------------------|-------------|--------------|
| Supply remaining  | Flag colour | Note element |
| 5-50 years        | Red Flag    |              |
| 50-500 years      | Amber Flag  | +            |
| +500 years        | Green Flag  |              |

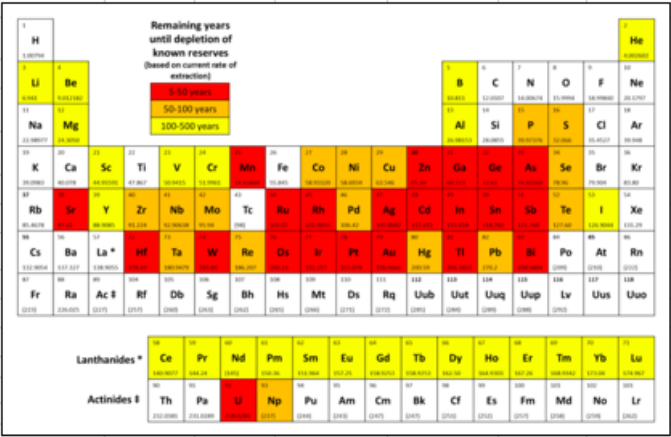

| Energy (First Pass)                          |            | Tick |  |                                                          |            | Tick |
|----------------------------------------------|------------|------|--|----------------------------------------------------------|------------|------|
| Reaction run between 0 to 70°C               | Green Flag | +    |  | Reaction run at reflux                                   | Red Flag   |      |
| Reaction run between -20 to 0 or 70 to 140°C | Amber Flag |      |  | Reaction run 5°C or more below the solvent boiling point | Green Flag | +    |
| Reaction run below -20 or above 140°C        | Red Flag   |      |  |                                                          |            |      |

| Batch/flow |            | Tick | Work Up                                                                                                                                                     | List                   |
|------------|------------|------|-------------------------------------------------------------------------------------------------------------------------------------------------------------|------------------------|
| Flow       | Green Flag |      | quenching<br>filtration                                                                                                                                     |                        |
| Batch      | Amber Flag | +    | centrifugation<br>crystallisation<br>Low temperature<br>distillation/evaporation/ sublimation (< 100°C)<br>solvent exchange, quenching into aqueous solvent | Green Flag<br>+        |
|            |            |      | chromatography/ion exchange<br>high temperature<br>multiple recrystallisation                                                                               | Amber Flag<br>Red Flag |

| Health & safety            |                                    |                                | List substances and H-codes                                              | List substances and H-codes | List substances and H-codes |
|----------------------------|------------------------------------|--------------------------------|--------------------------------------------------------------------------|-----------------------------|-----------------------------|
| Highly explosive           | Red Flag<br>H200, H201, H202, H203 | Amber Flag<br>H205, H220, H224 | Green Flag<br>If no red or amber flagged H codes present then green flag |                             |                             |
| Explosive thermal runaway  | H230, H240, H250                   | H241                           |                                                                          |                             |                             |
| Toxic                      | H300, H310, H330                   | H301, H311, H331               |                                                                          |                             |                             |
| Long Term toxicity         | H340, H350, H360, H370, H372       | H341, H351, H361, H371, H373   |                                                                          |                             |                             |
| Environmental implications | H400, H410, H411, H420             | H401, H412                     |                                                                          |                             |                             |
|                            |                                    |                                | TMU                                                                      |                             |                             |
|                            |                                    |                                | EDC HCl                                                                  |                             |                             |

| Use of chemicals of environmental concern                                            |          | List substances of very high concern |
|--------------------------------------------------------------------------------------|----------|--------------------------------------|
| Chemical identified as Substances of Very High Concern by ChemSec which are utilised | Red Flag | TMU, EDC HCl                         |



## 8. References

- 1 V. Štrukil, B. Bartolec, T. Portada, I. Đilović, I. Halasz and D. Margetić, *Chem. Commun.*, 2012, **48**, 12100–12102.
- 2 T. Dalidovich, K. A. Mishra, T. Shalima, M. Kudrjašova, D. G. Kananovich and R. Aav, *ACS Sustain. Chem. Eng.*, 2020, **8**, 15703–15715.
- 3 T.-X. Métro, J. Bonnamour, T. Reidon, J. Sarpoulet, J. Martinez and F. Lamaty, *Chem. Commun.*, 2012, **48**, 11781–11783.
- 4 W. I. Nicholson, F. Barreteau, J. A. Leitch, R. Payne, I. Priestley, E. Godineau, C. Battilocchio and D. L. Browne, *Angew. Chem. Int. Ed.*, 2021, **60**, 21868–21874.
- 5 Y. Nishimoto, A. Okita, M. Yasuda and A. Baba, *Org. Lett.*, 2012, **14**, 1846–1849.
- 6 T. Dalidovich, J. V. Nallaparaju, T. Shalima, R. Aav and D. G. Kananovich, *ChemSusChem*, 2022, **15**, e202102286.
- 7 L. Pignataro, C. Bovio, M. Civera, U. Piarulli and C. Gennari, *Chem. – Eur. J.*, 2012, **18**, 10368–10381.
- 8 H. Tsuji and H. Yamamoto, *J. Am. Chem. Soc.*, 2016, **138**, 14218–14221.
- 9 E. Vilkas, M. Vilkas and J. Sainton, *Tetrahedron Lett.*, 1978, **19**, 2933–2934.
- 10 S. Bera, P. Jana, S. K. Maity and D. Haldar, *Cryst. Growth Des.*, 2014, **14**, 1032–1038.
- 11 W. C. Fu and T. F. Jamison, *Org. Lett.*, 2019, **21**, 6112–6116.
- 12 G. M. Sheldrick, *Acta Crystallogr. Sect. A*, 2015, **71**, 3–8.
- 13 O. V. Dolomanov, L. J. Bourhis, R. J. Gildea, J. A. K. Howard and H. Puschmann, *J. Appl. Crystallogr.*, 2009, **42**, 339–341.
- 14 M. D. Khunt, N. S. Patil, H. S. Pagire and N. S. Pradhan, World Pat., 2011095835A1, 2011.
- 15 Y. Heo, D. Hyun, M. R. Kumar, H. M. Jung and S. Lee, *Tetrahedron Lett.*, 2012, **53**, 6657–6661.
- 16 Y.-F. Liu, C.-L. Wang, Y.-J. Bai, N. Han, J.-P. Jiao and X.-L. Qi, *Org. Process Res. Dev.*, 2008, **12**, 490–495.
- 17 A. Kompella, A. K. S. Bhujanga Rao, N. Venkaiah Chowdary and R. Srinivas, World Pat., 2004108699A1, 2004.
- 18 Z. Szakács, S. Béni, Z. Varga, L. Örfi, G. Kéri and B. Noszál, *J. Med. Chem.*, 2005, **48**, 249–255.
- 19 W. Szczepek, W. Luniewski, L. Kaczmarek, B. Zagrodzki, D. Samson-Lazinska, W. Szelejewski and M. Skarzynski, World Pat., 2006071130A2, 2006.
- 20 C. R. McElroy, A. Constantinou, L. C. Jones, L. Summerton and J. H. Clark, *Green Chem.*, 2015, **17**, 3111–3121.
- 21 J. C. Graham, A. Trejo-Martin, M. L. Chilton, J. Kostal, J. Bercu, G. L. Beutner, U. S. Bruen, D. G. Dolan, S. Gomez, J. Hillegass, J. Nicolette and M. Schmitz, *Chem. Res. Toxicol.*, 2022, **35**, 1011–1022.
- 22 J. B. Sperry, C. J. Minter, J. Tao, R. Johnson, R. Duzguner, M. Hawksworth, S. Oke, P. F. Richardson, R. Barnhart, D. R. Bill, R. A. Giusto and J. D. I. Weaver, *Org. Process Res. Dev.*, 2018, **22**, 1262–1275.



## 9. $^1\text{H}$ and $^{13}\text{C}$ NMR data

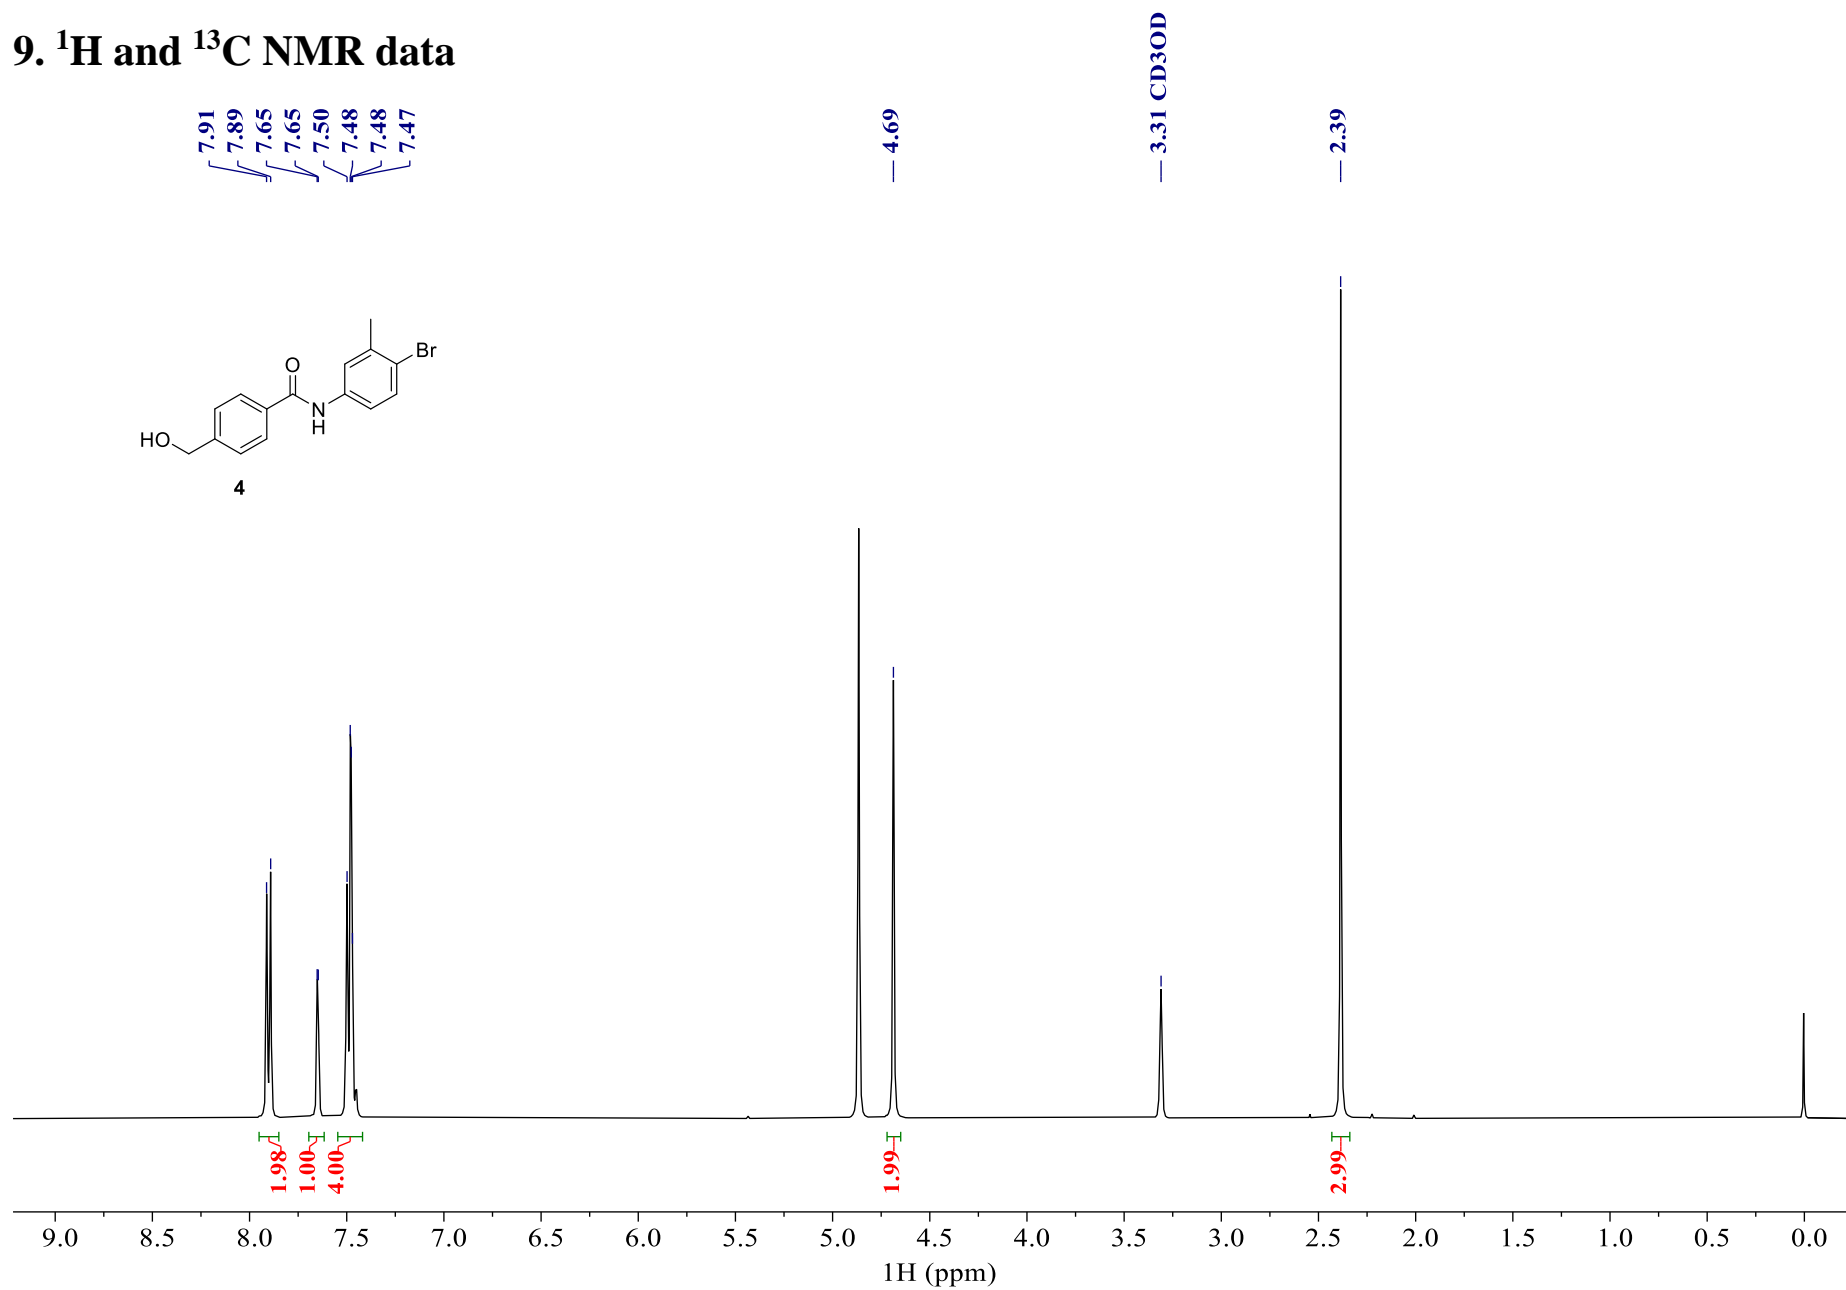



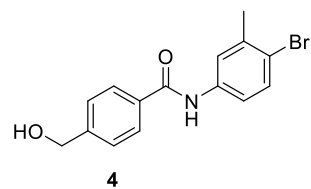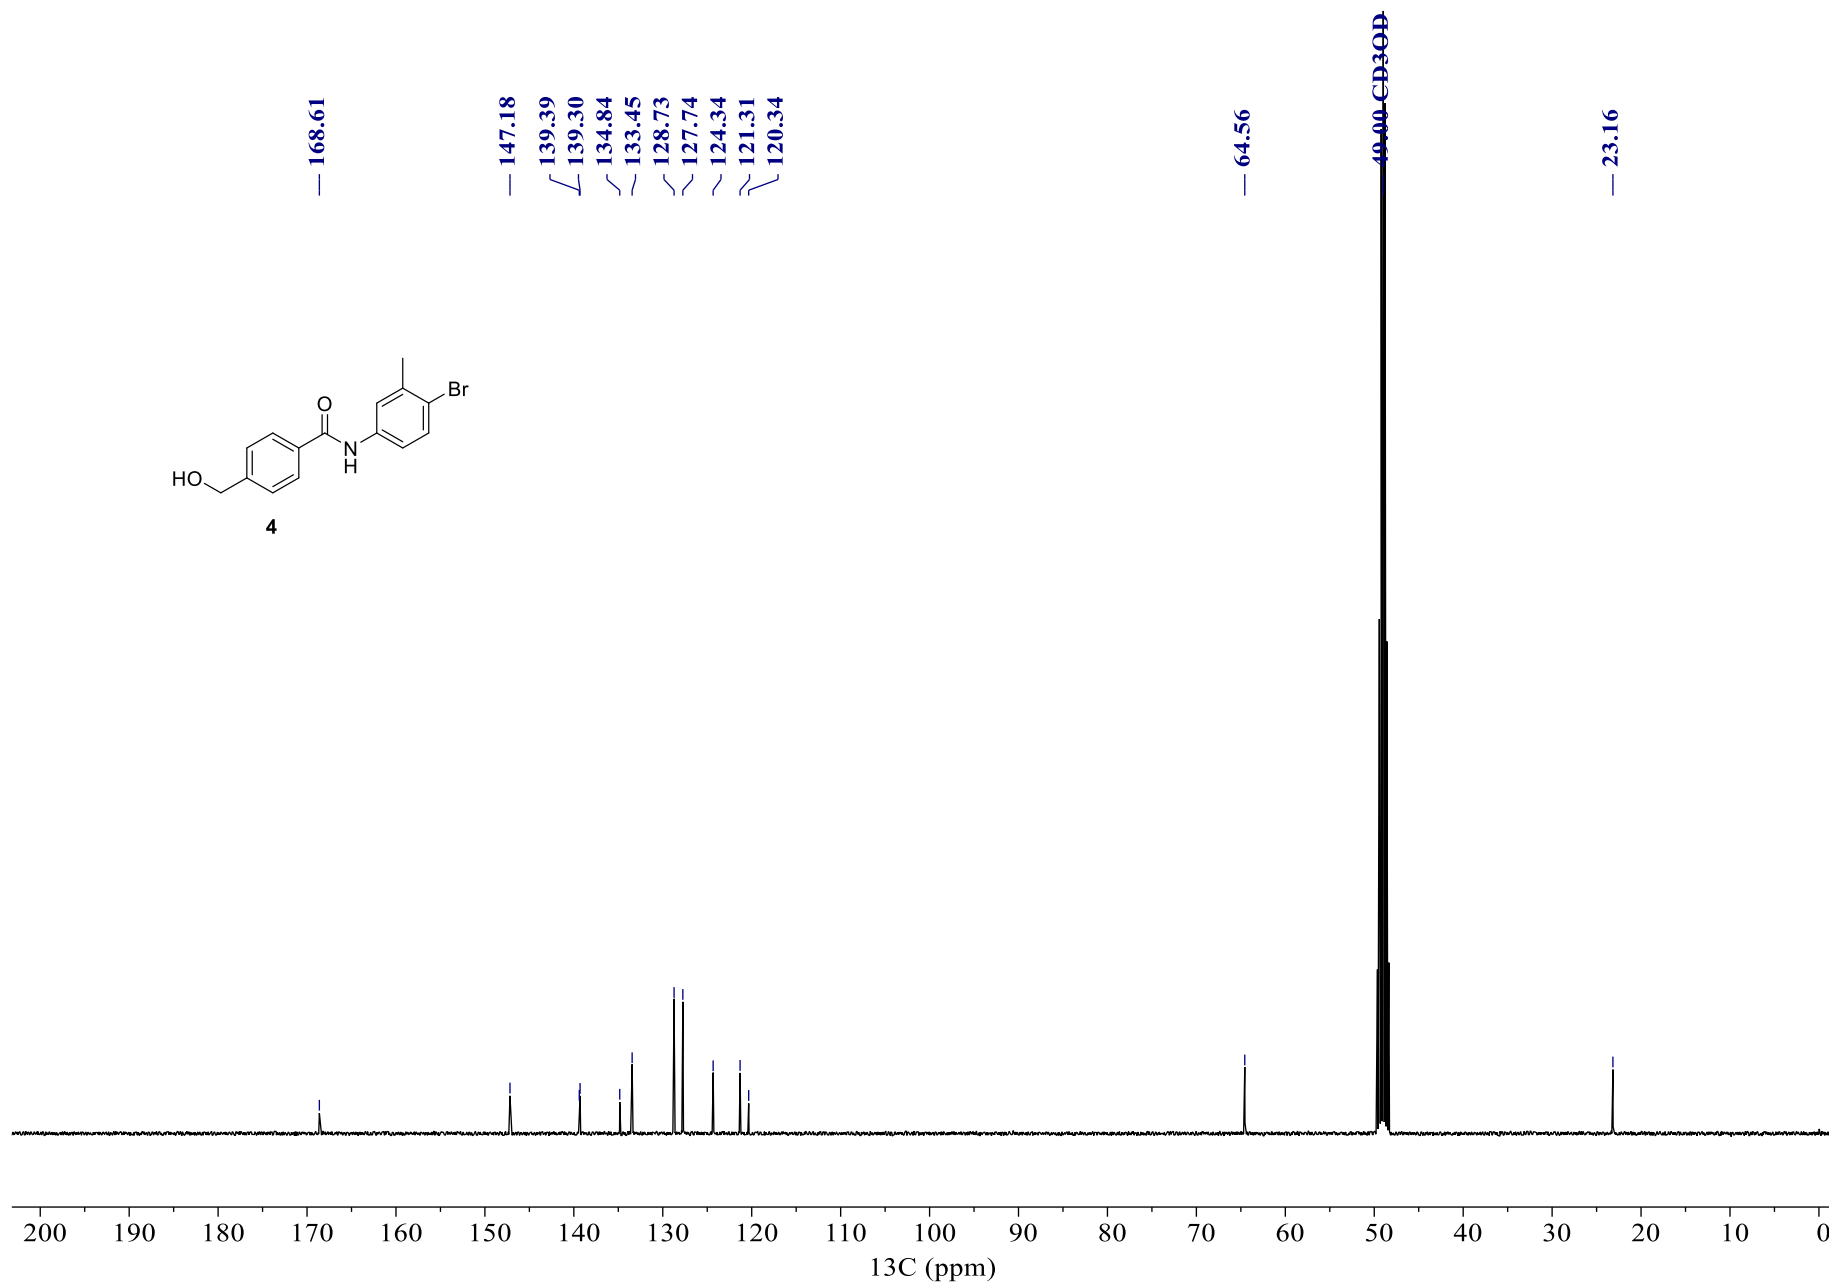



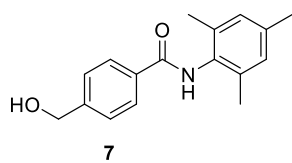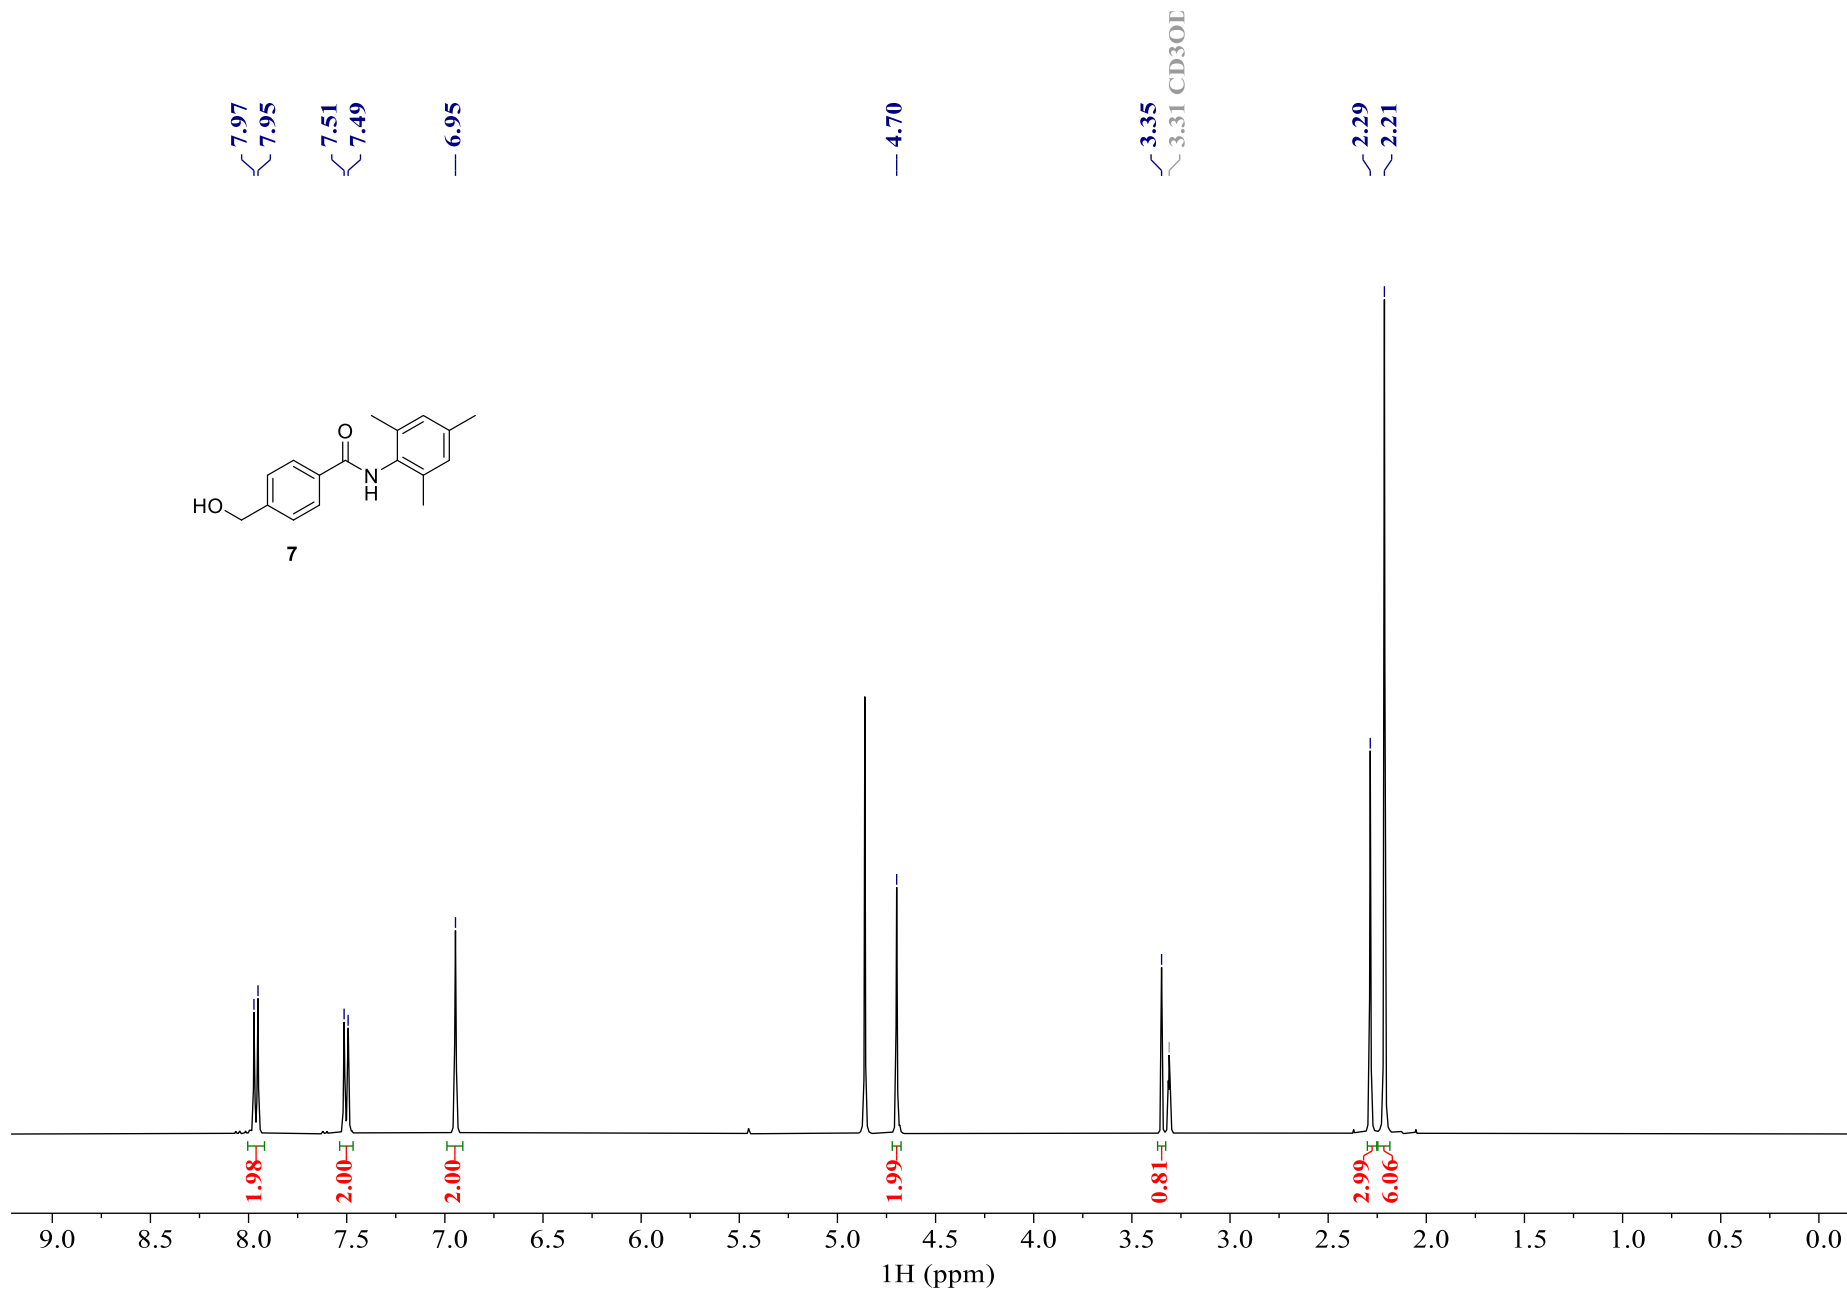

S43



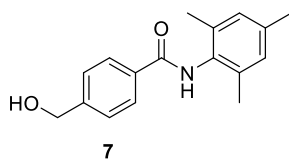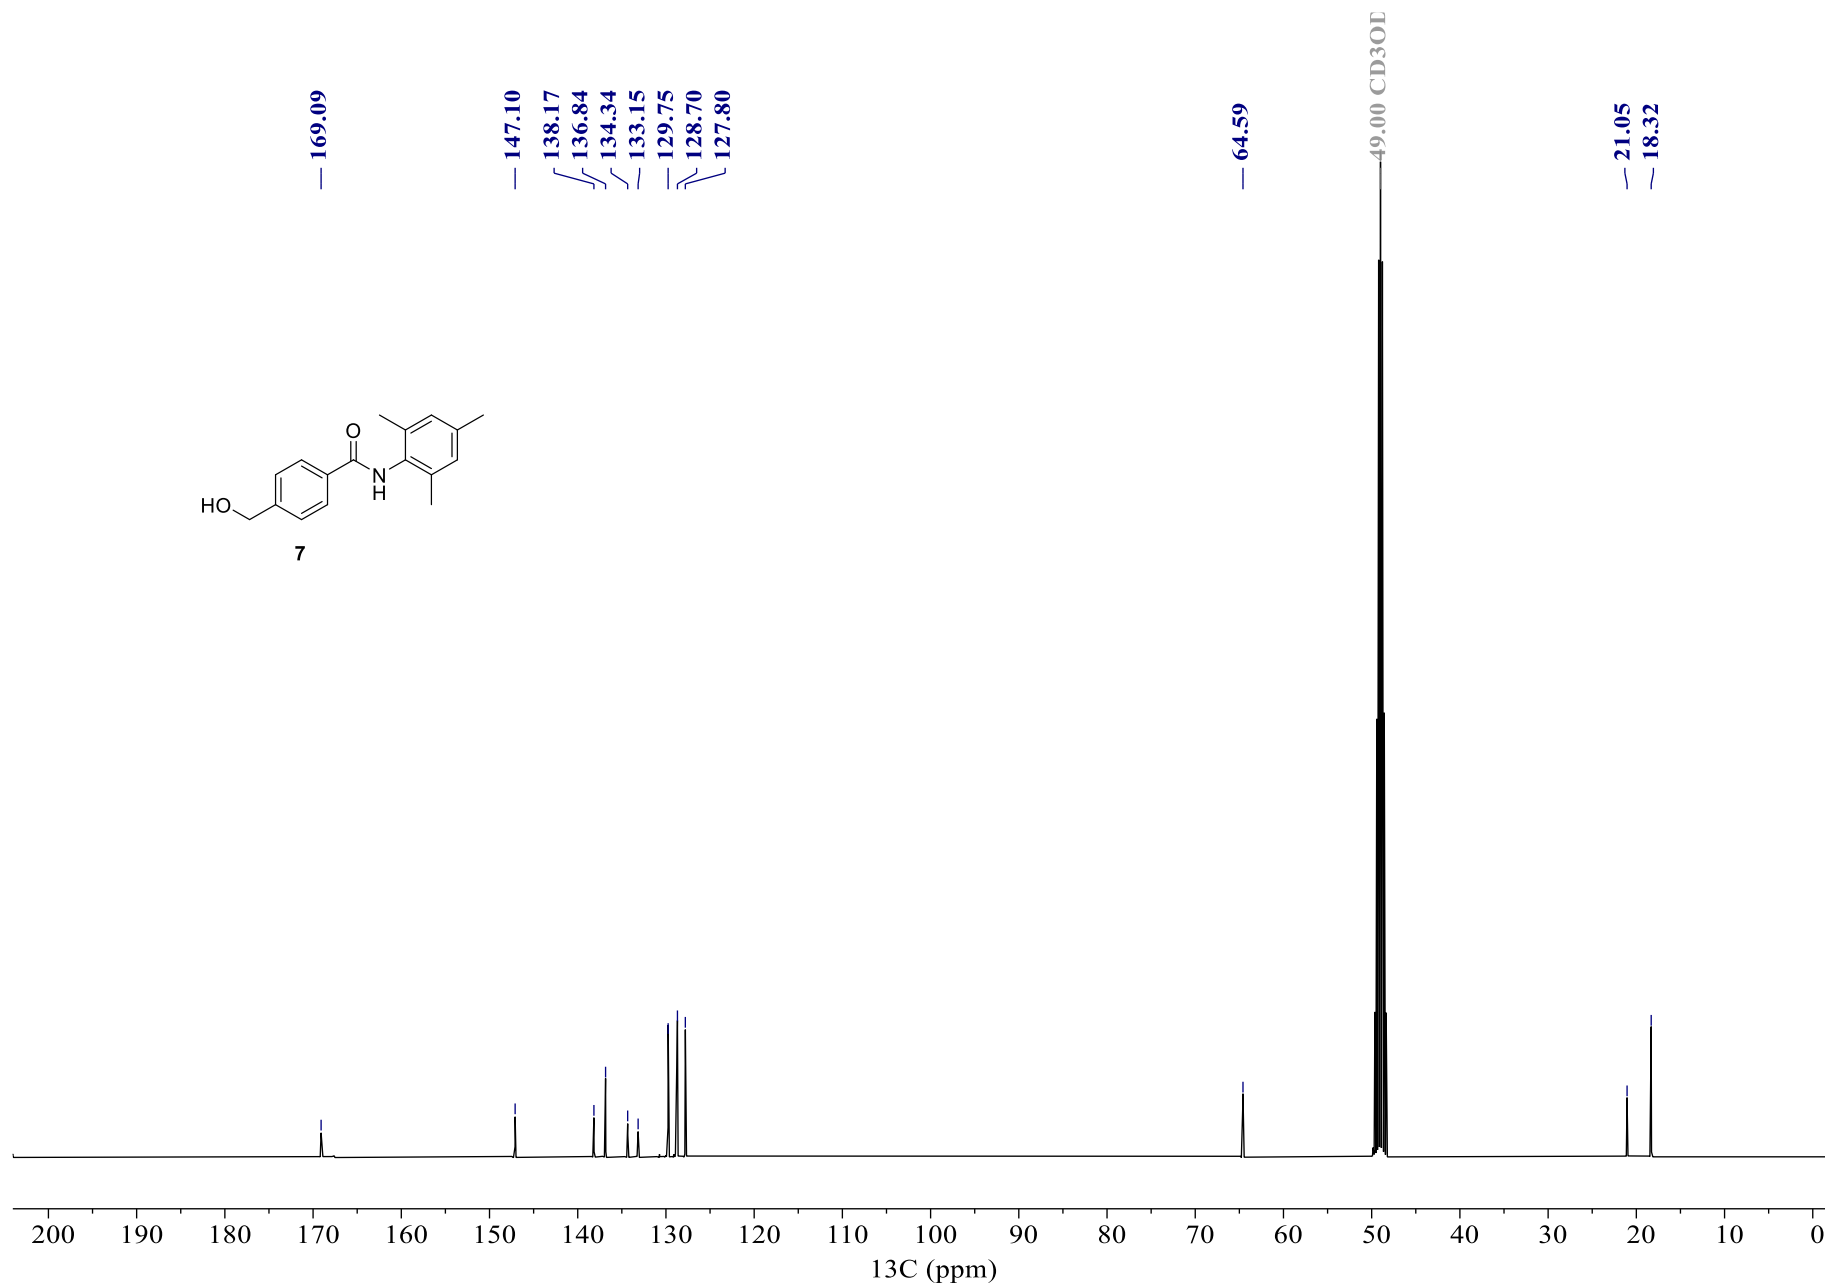



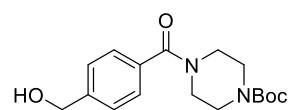

8

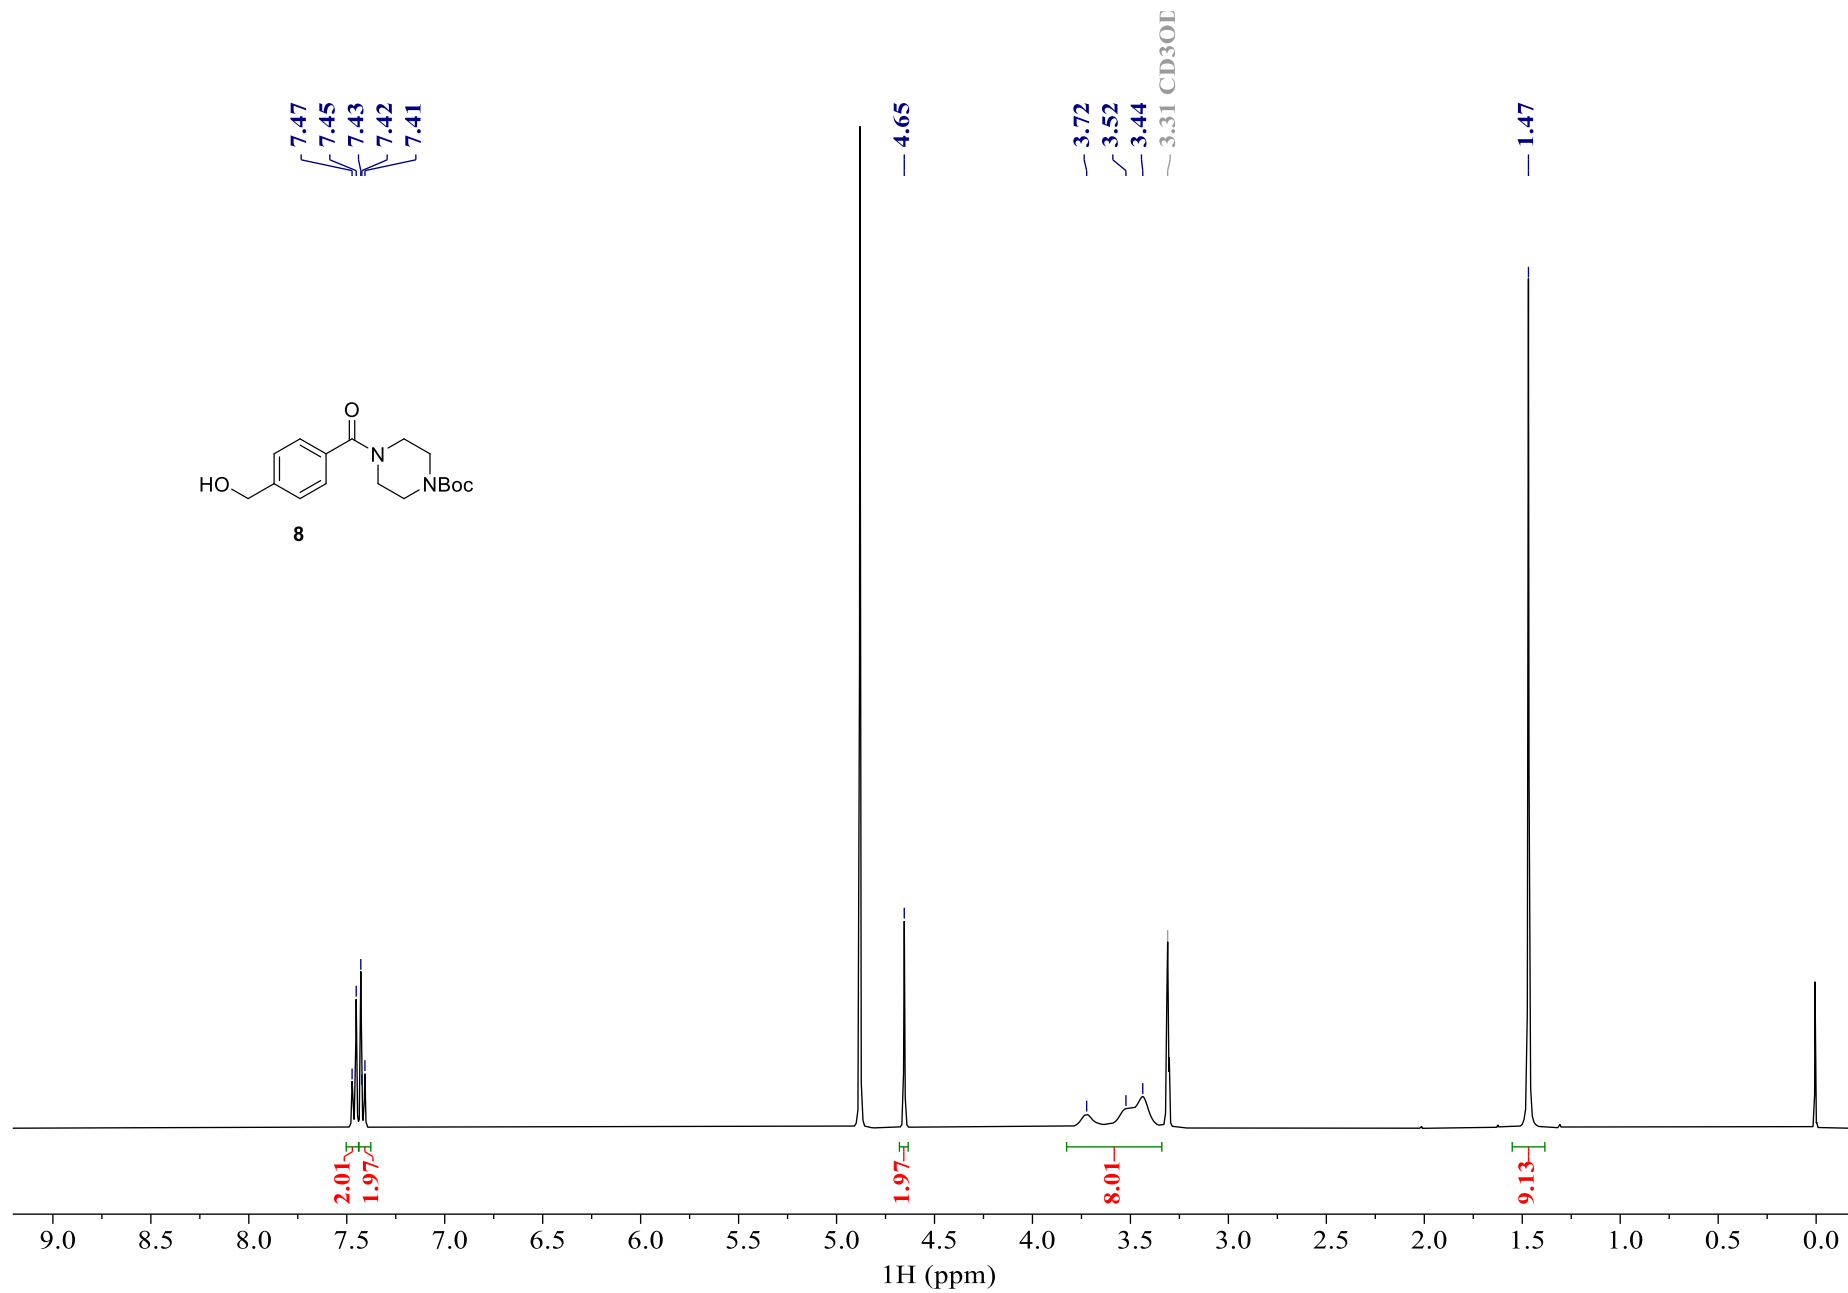

S45



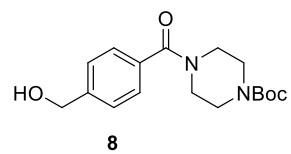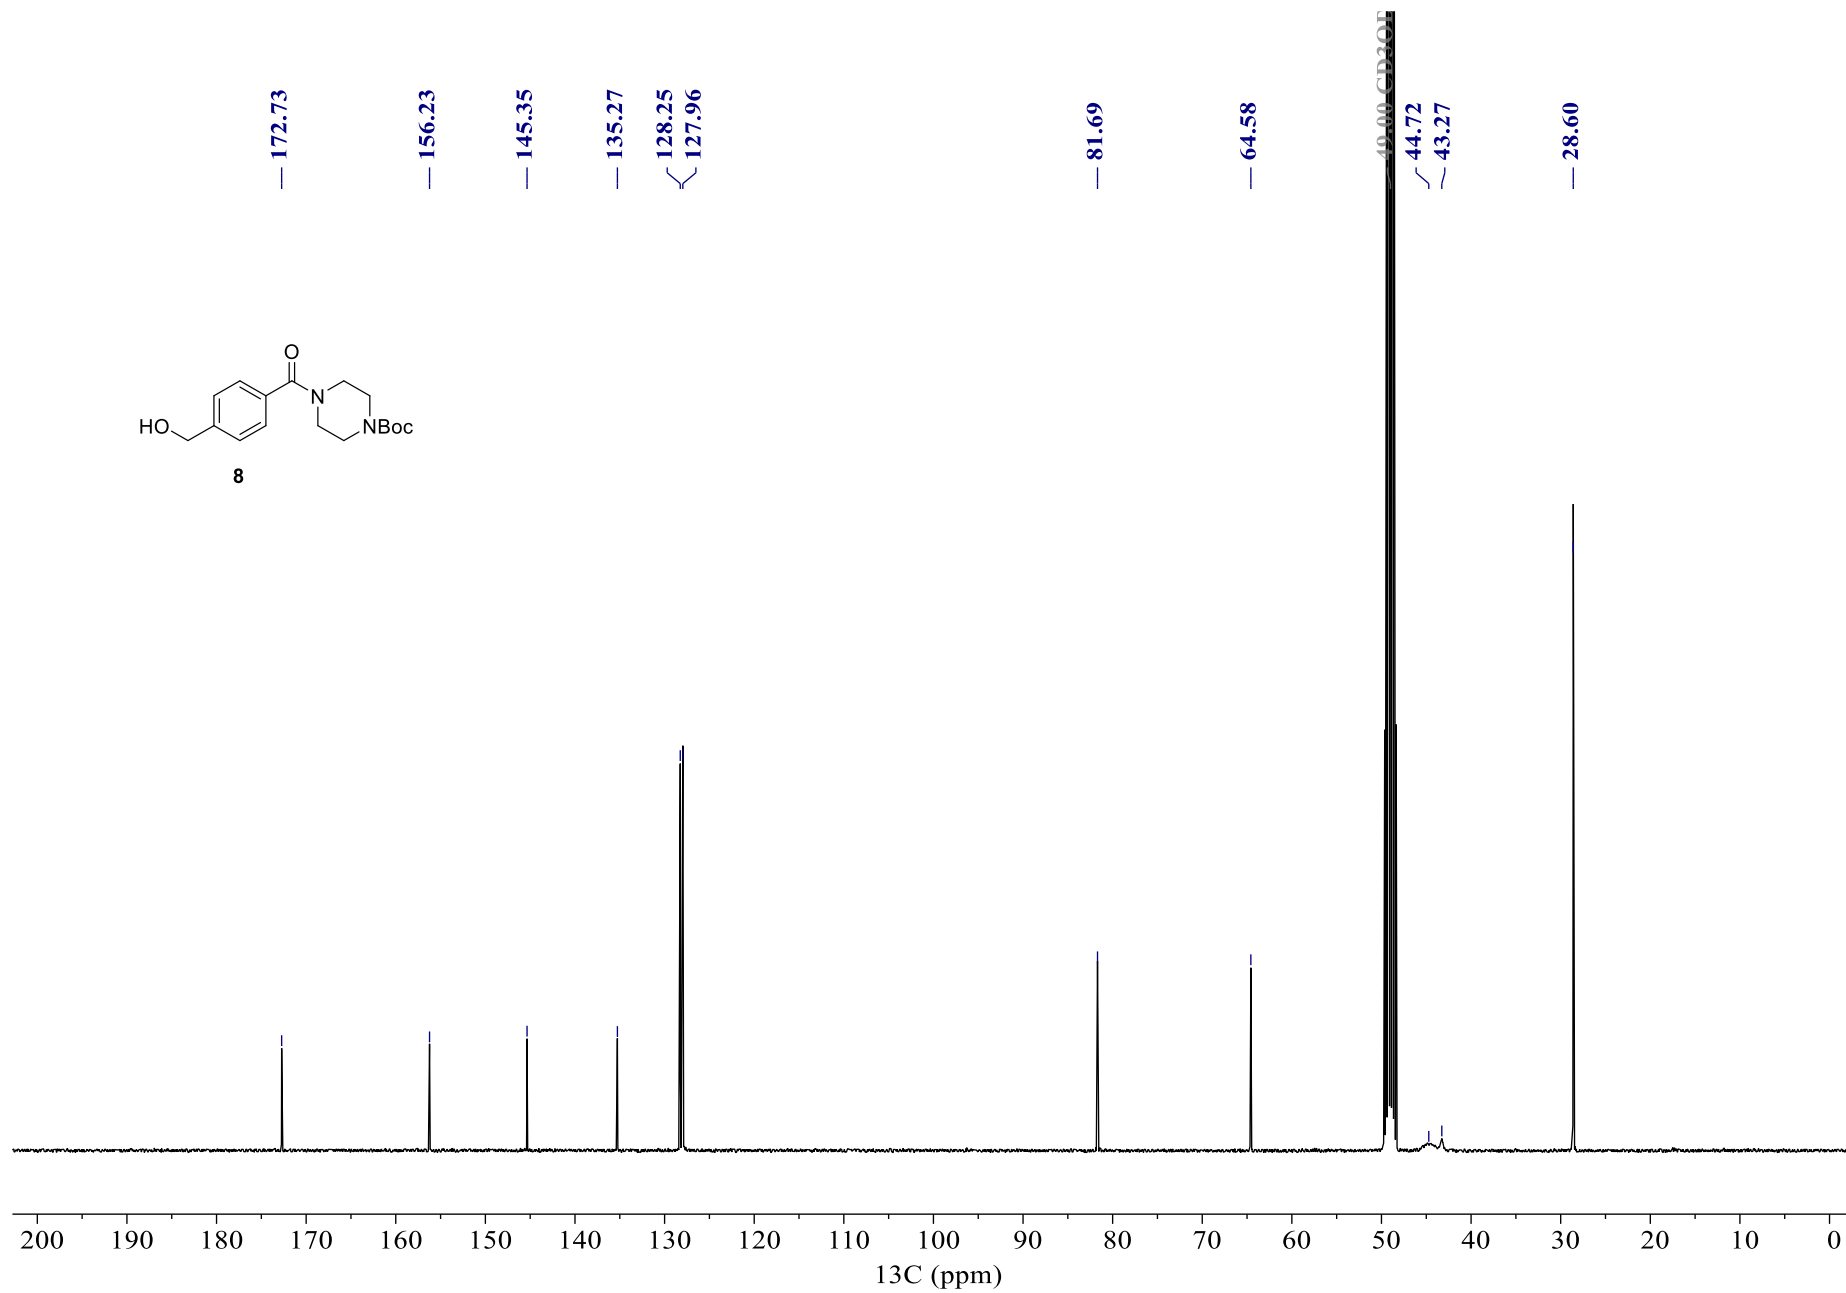



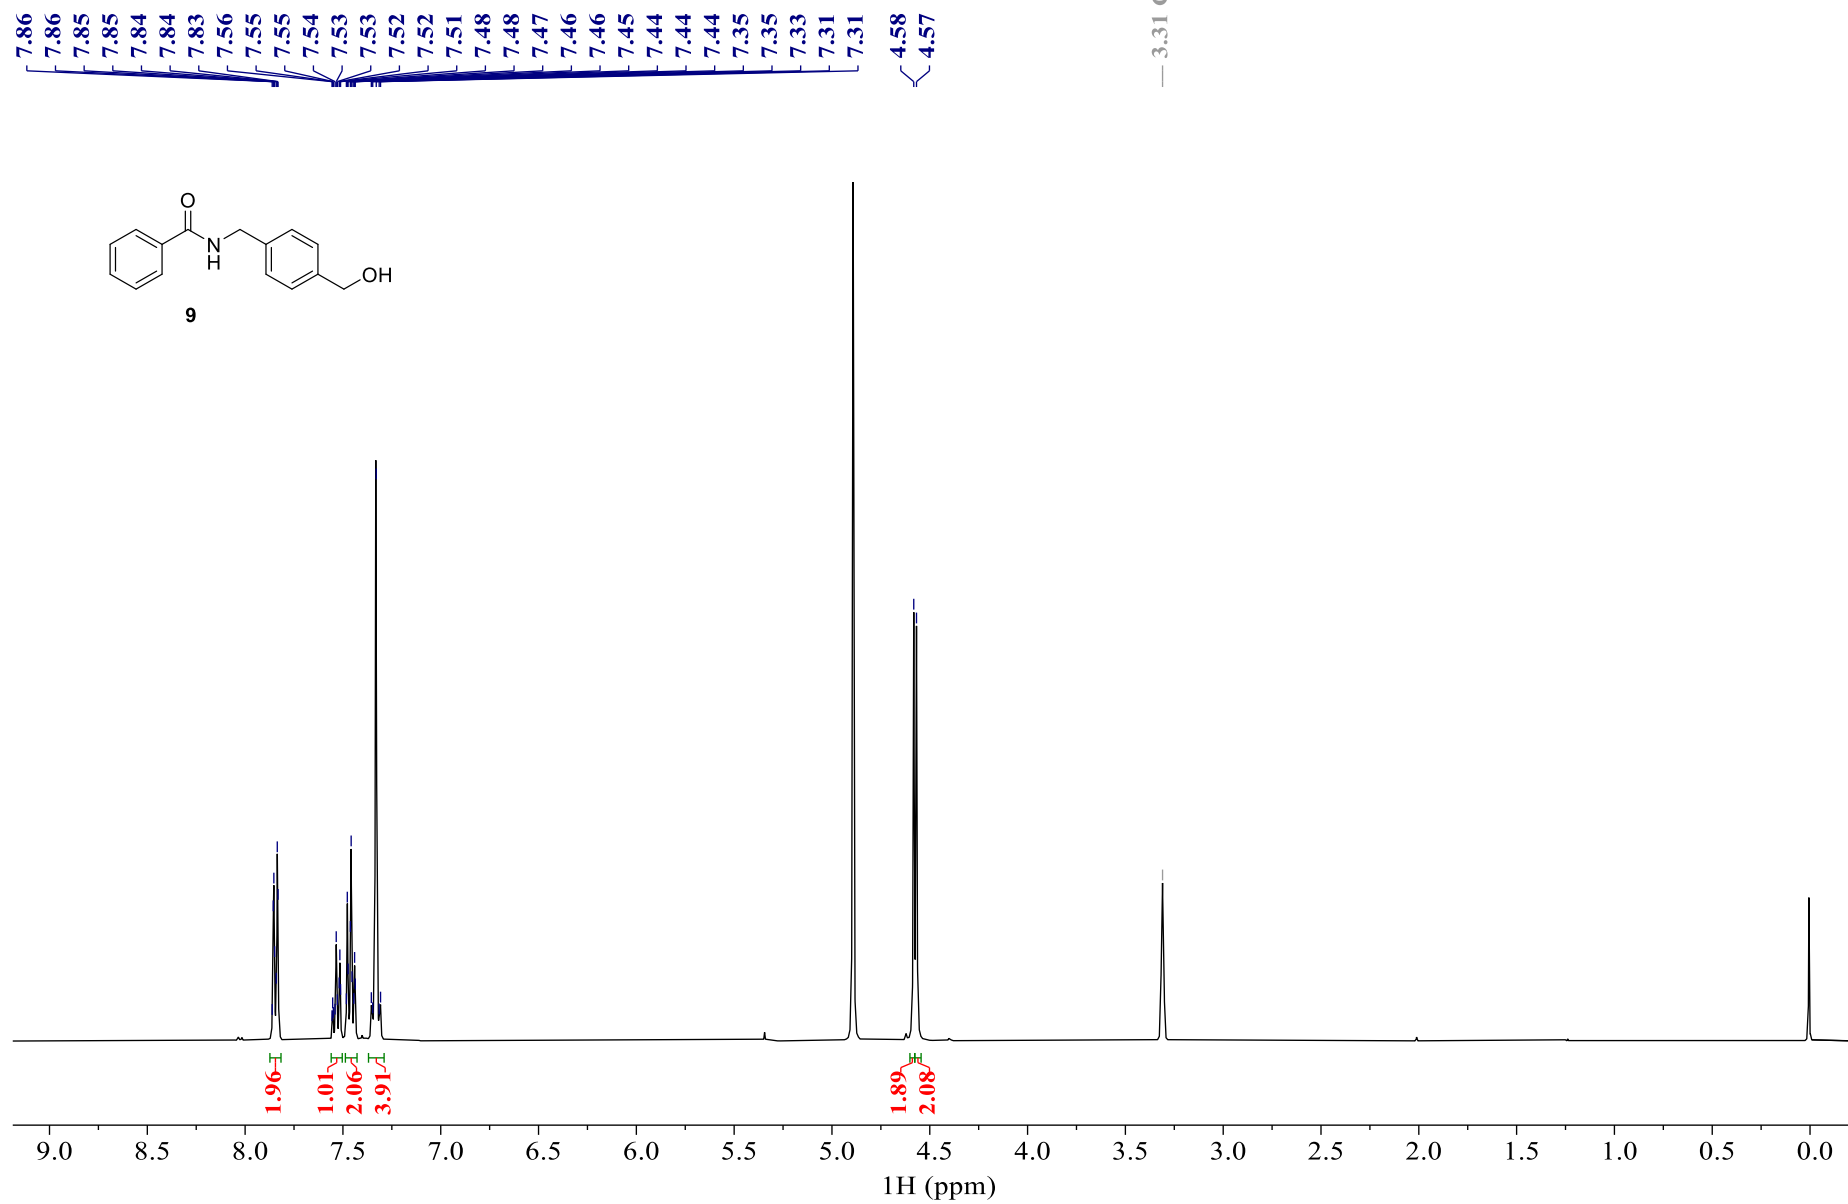

— 3.31 CD30E



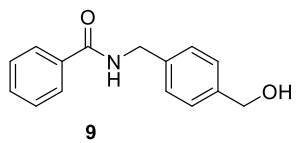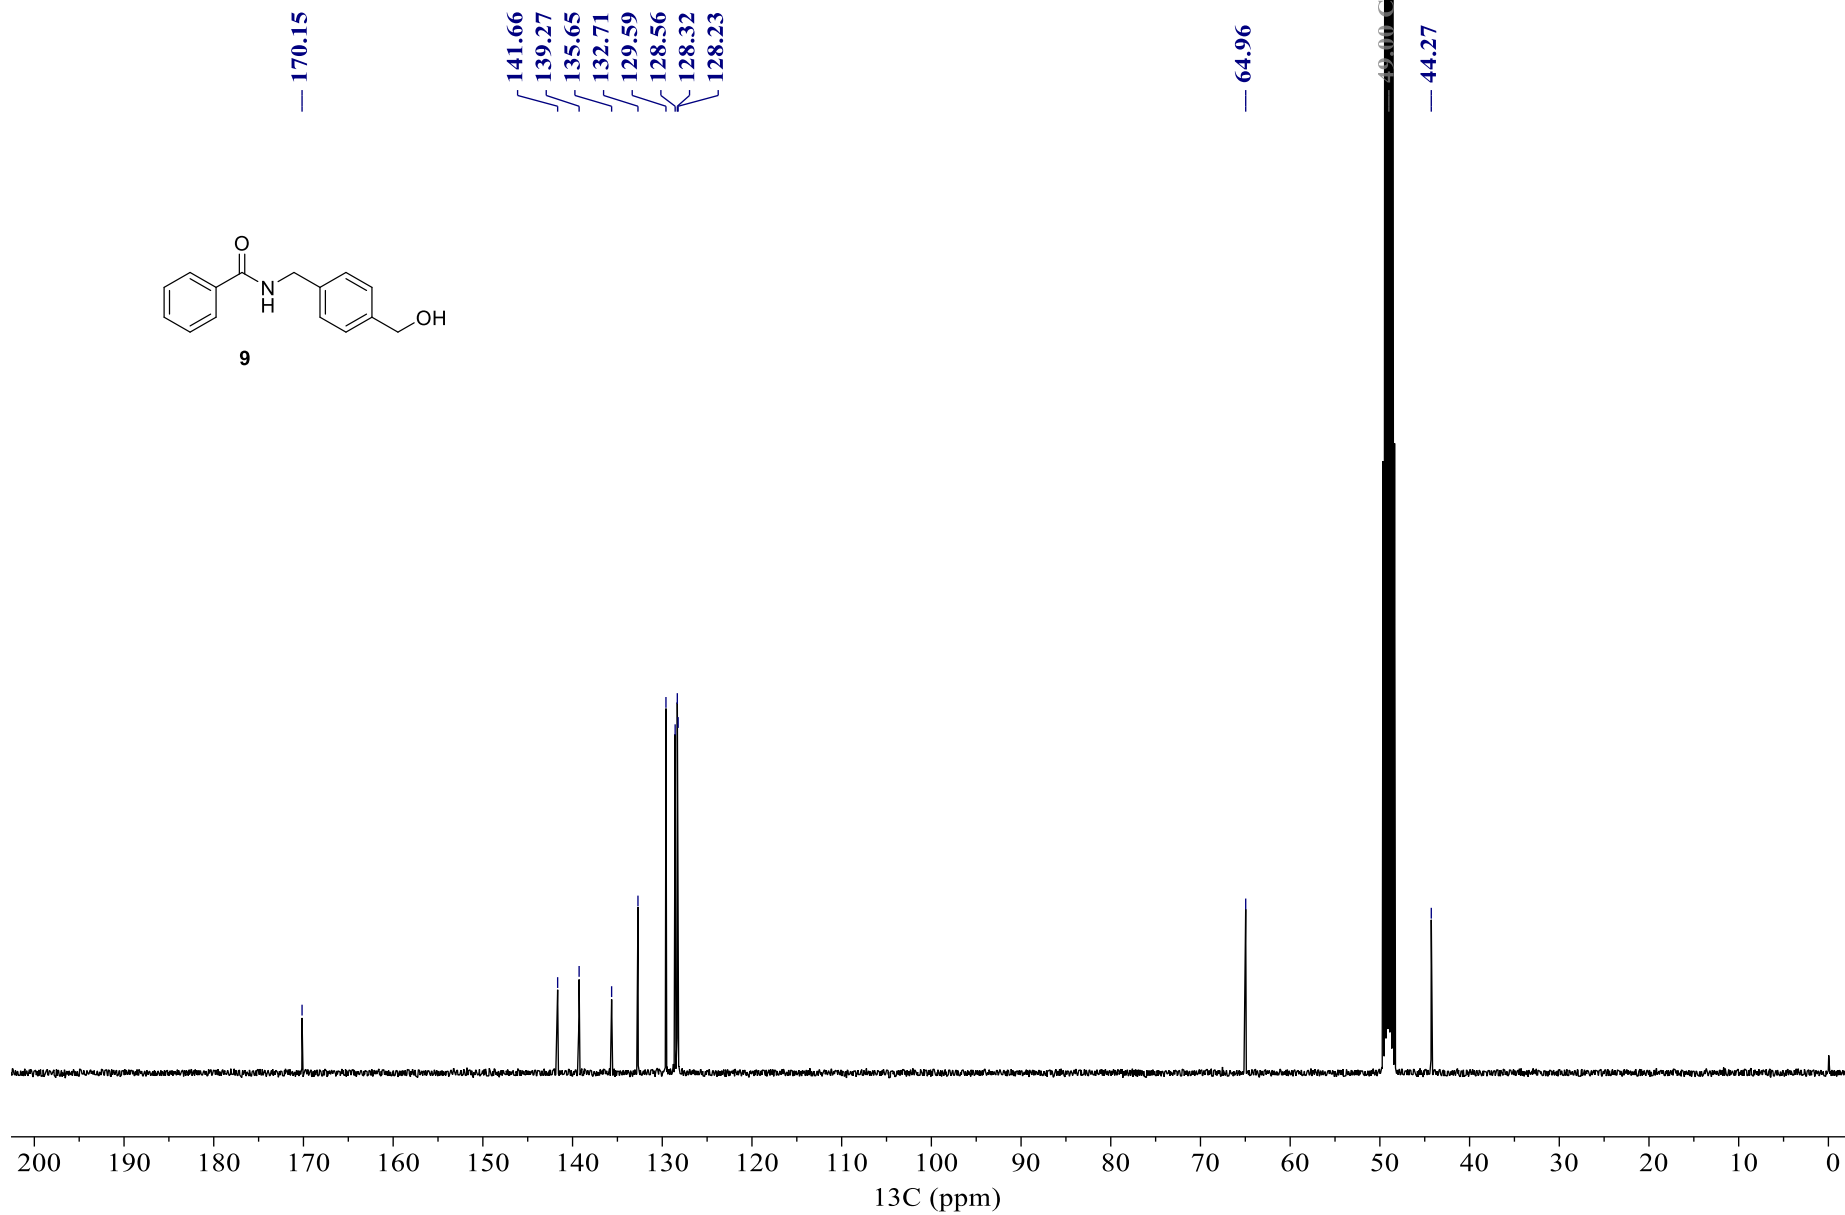



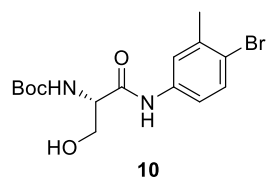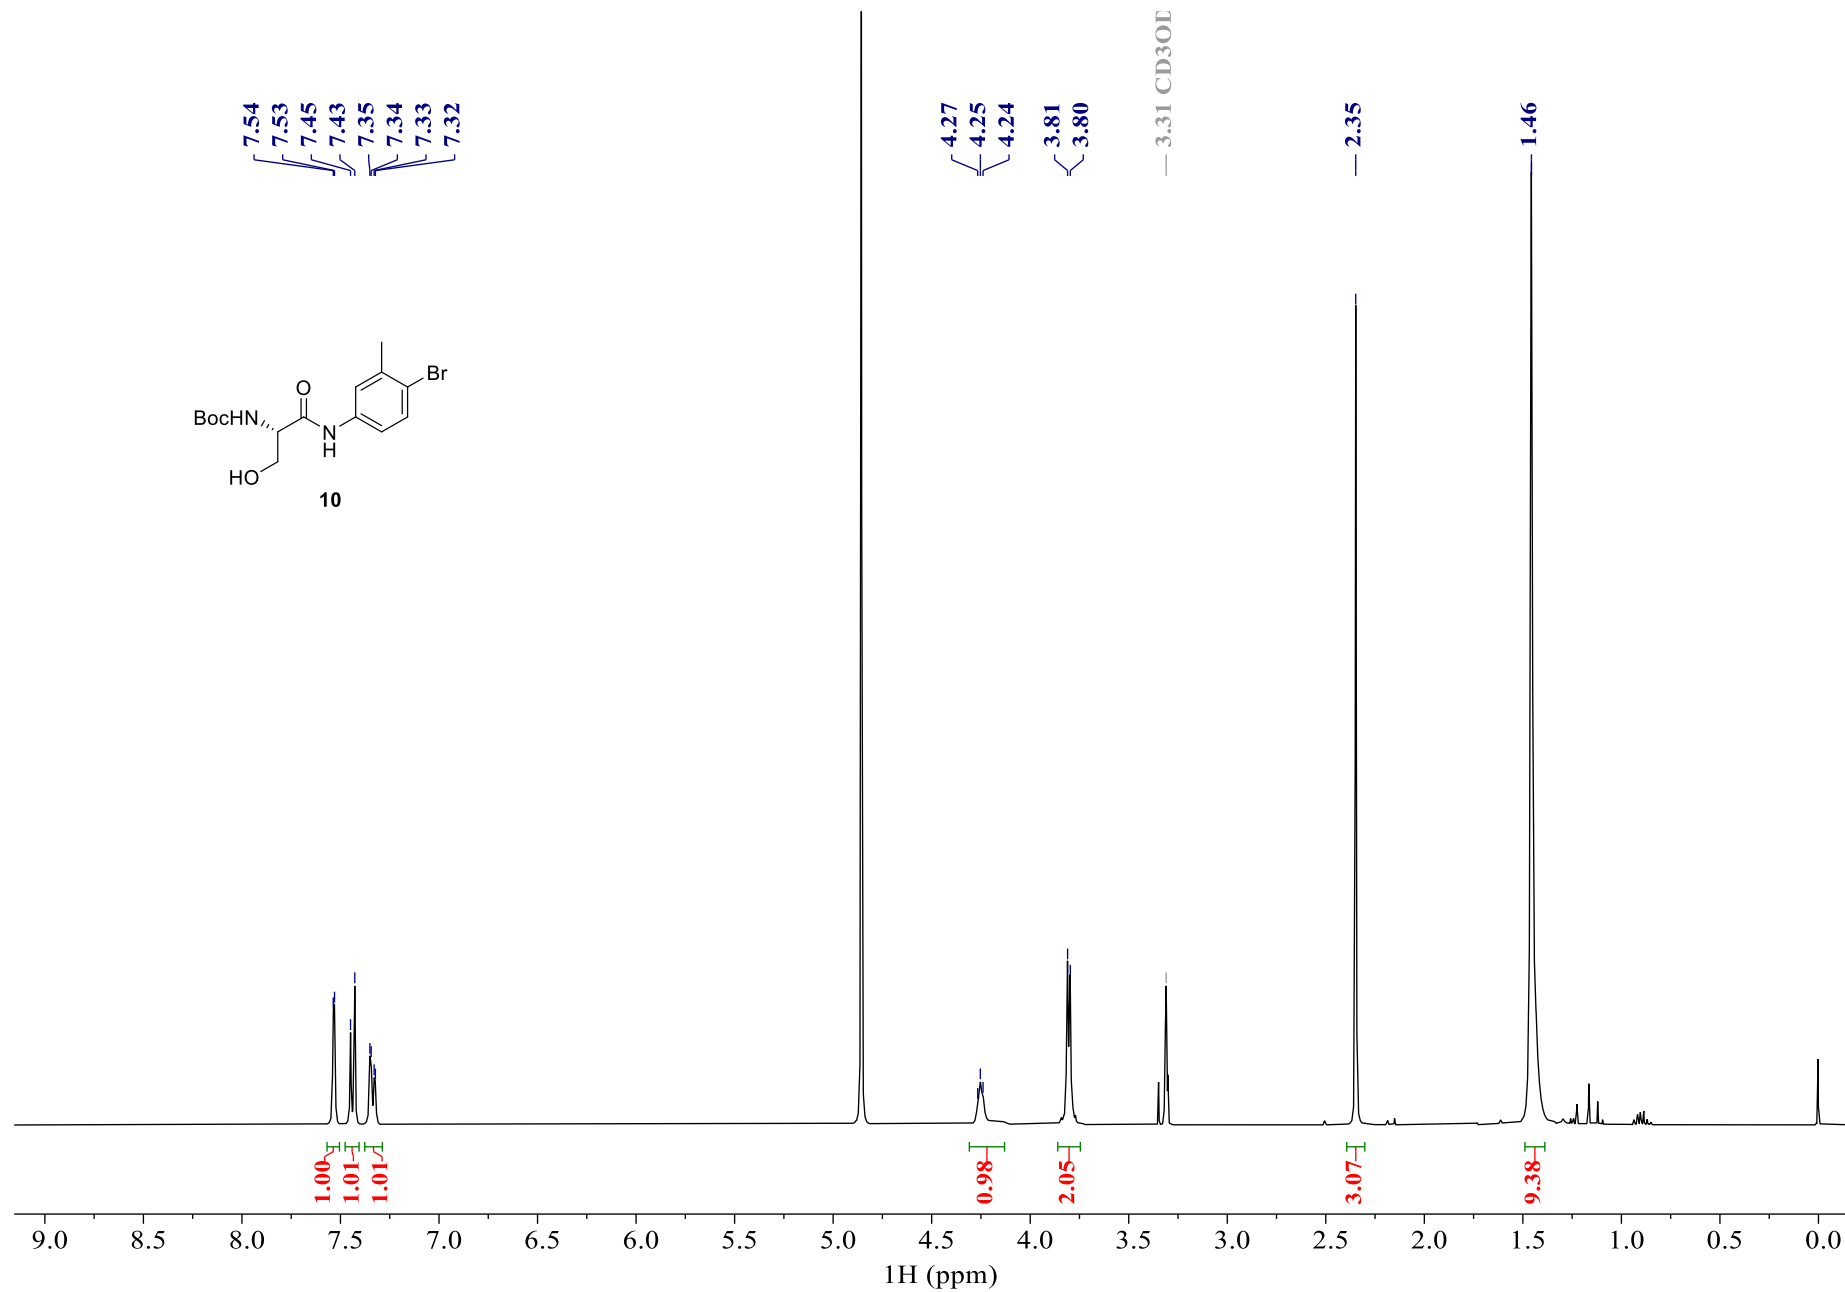



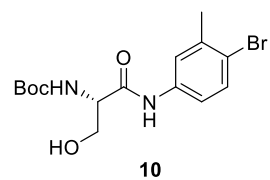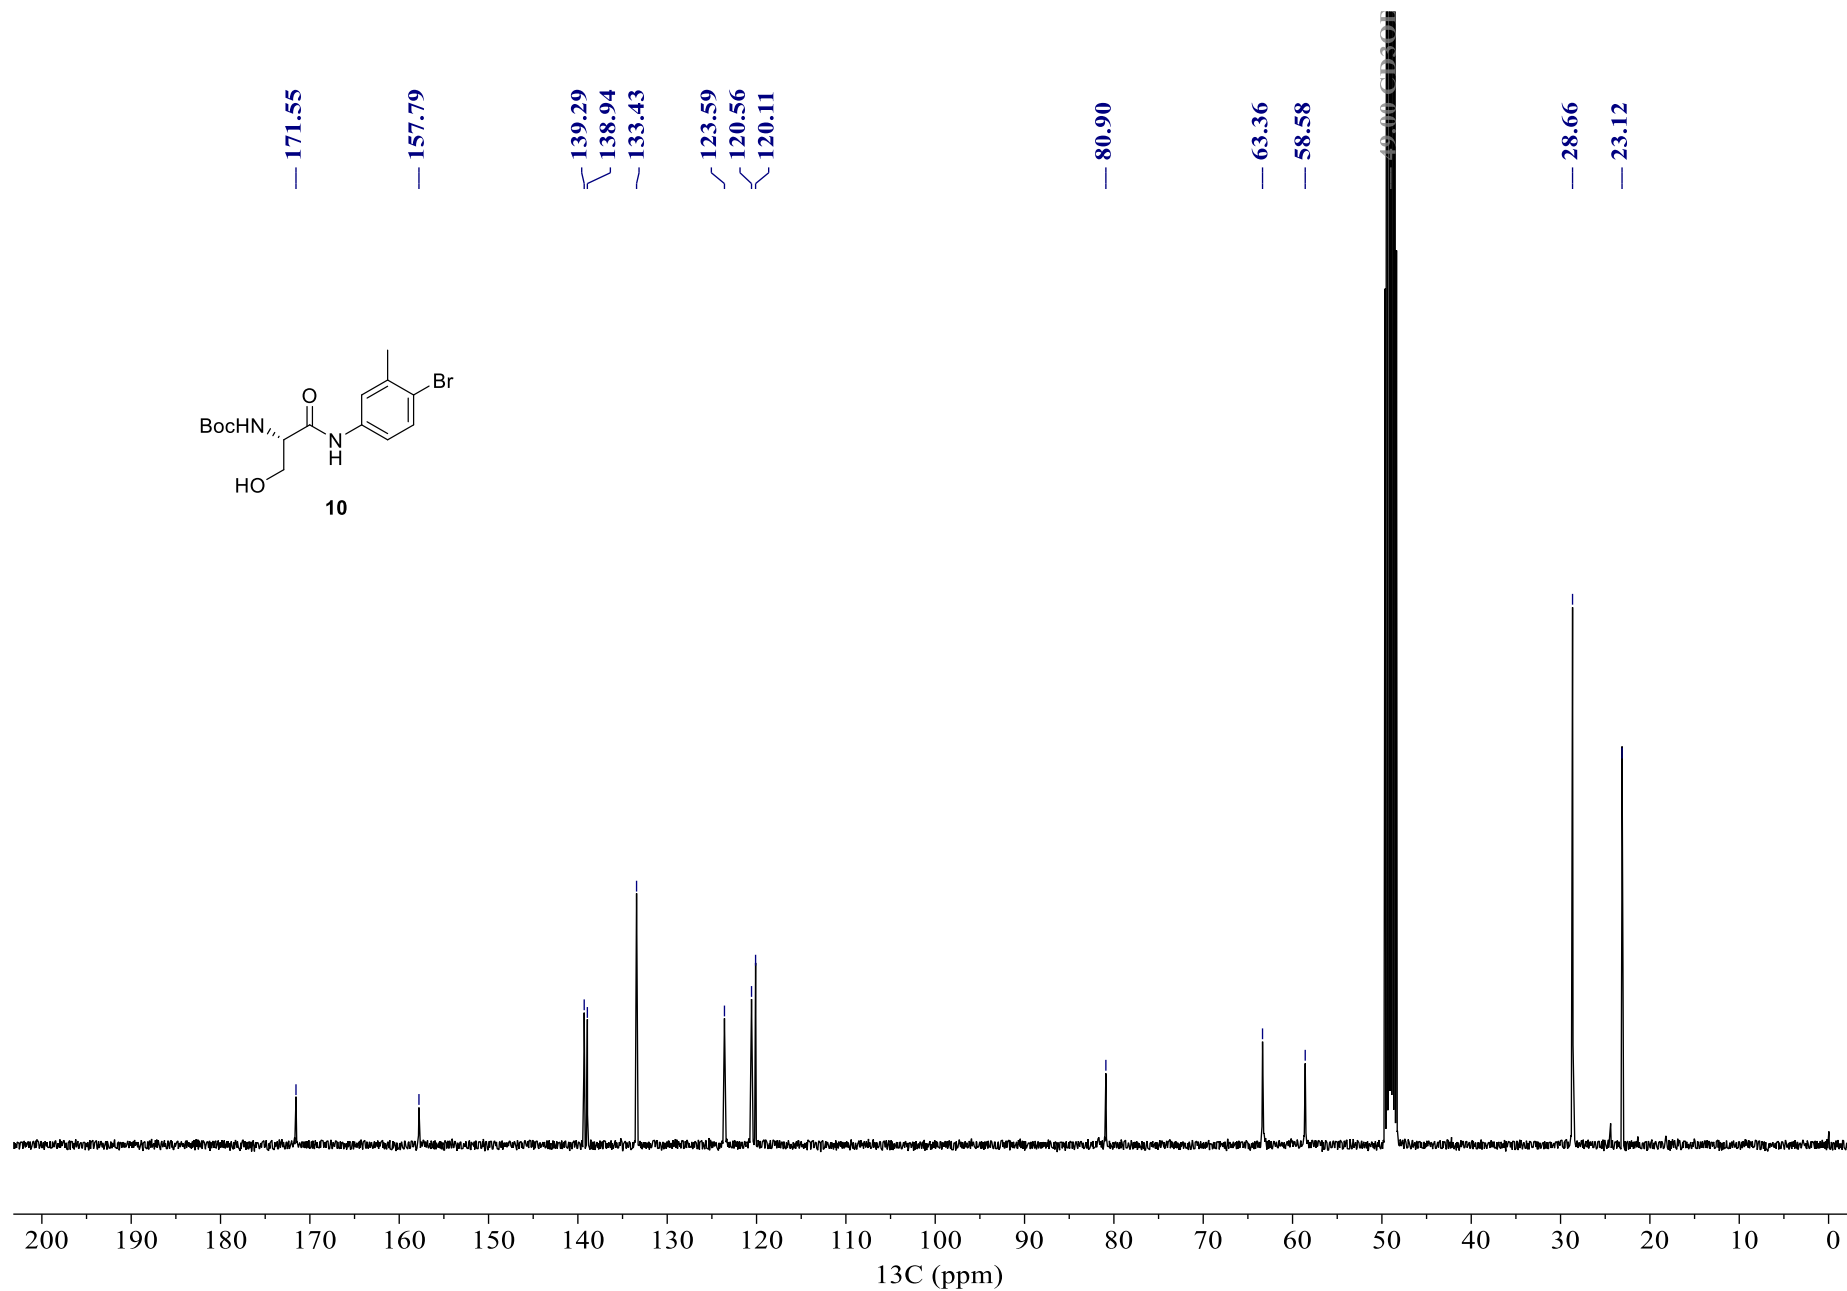



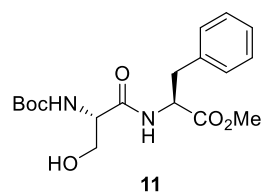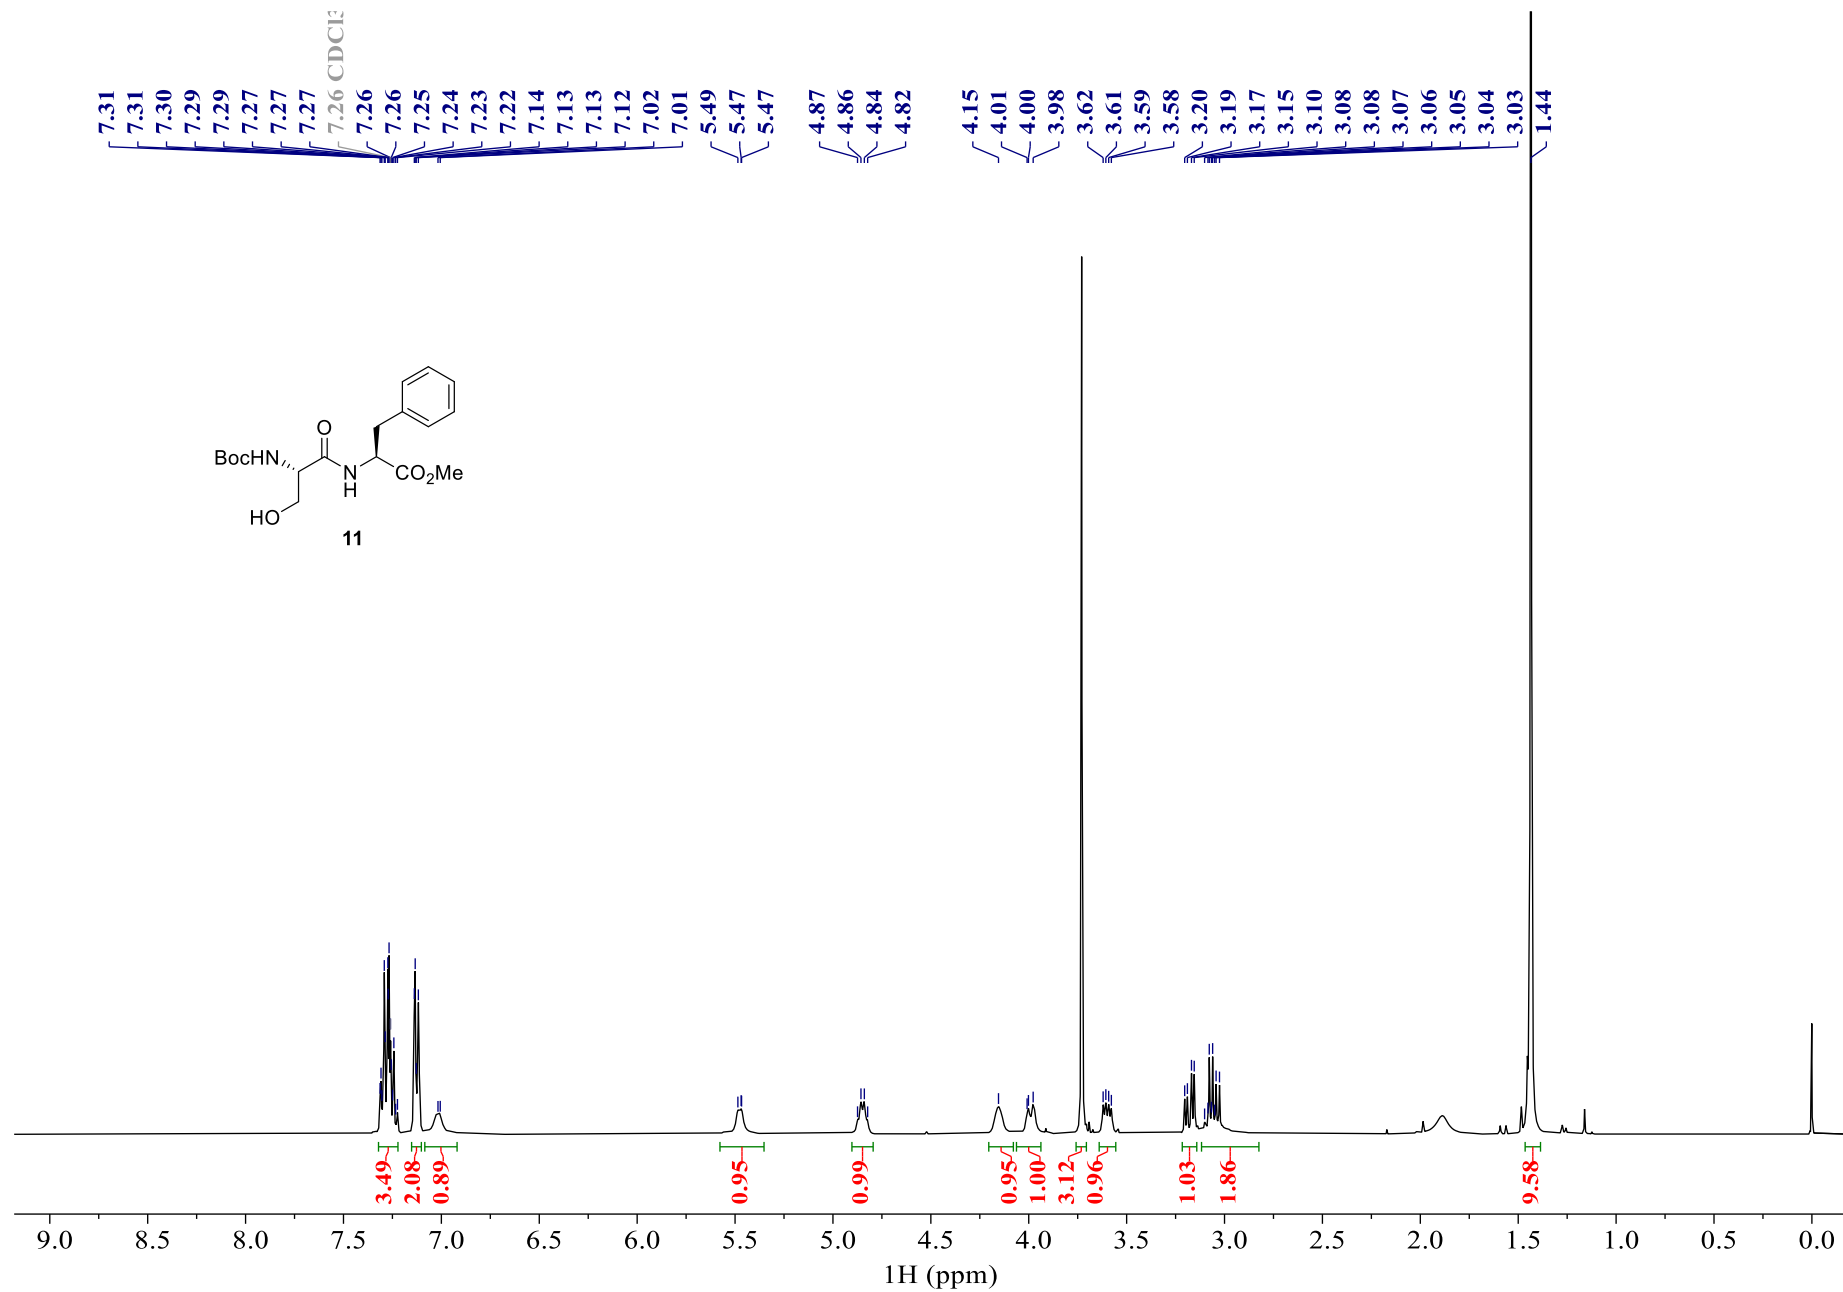



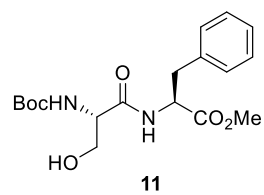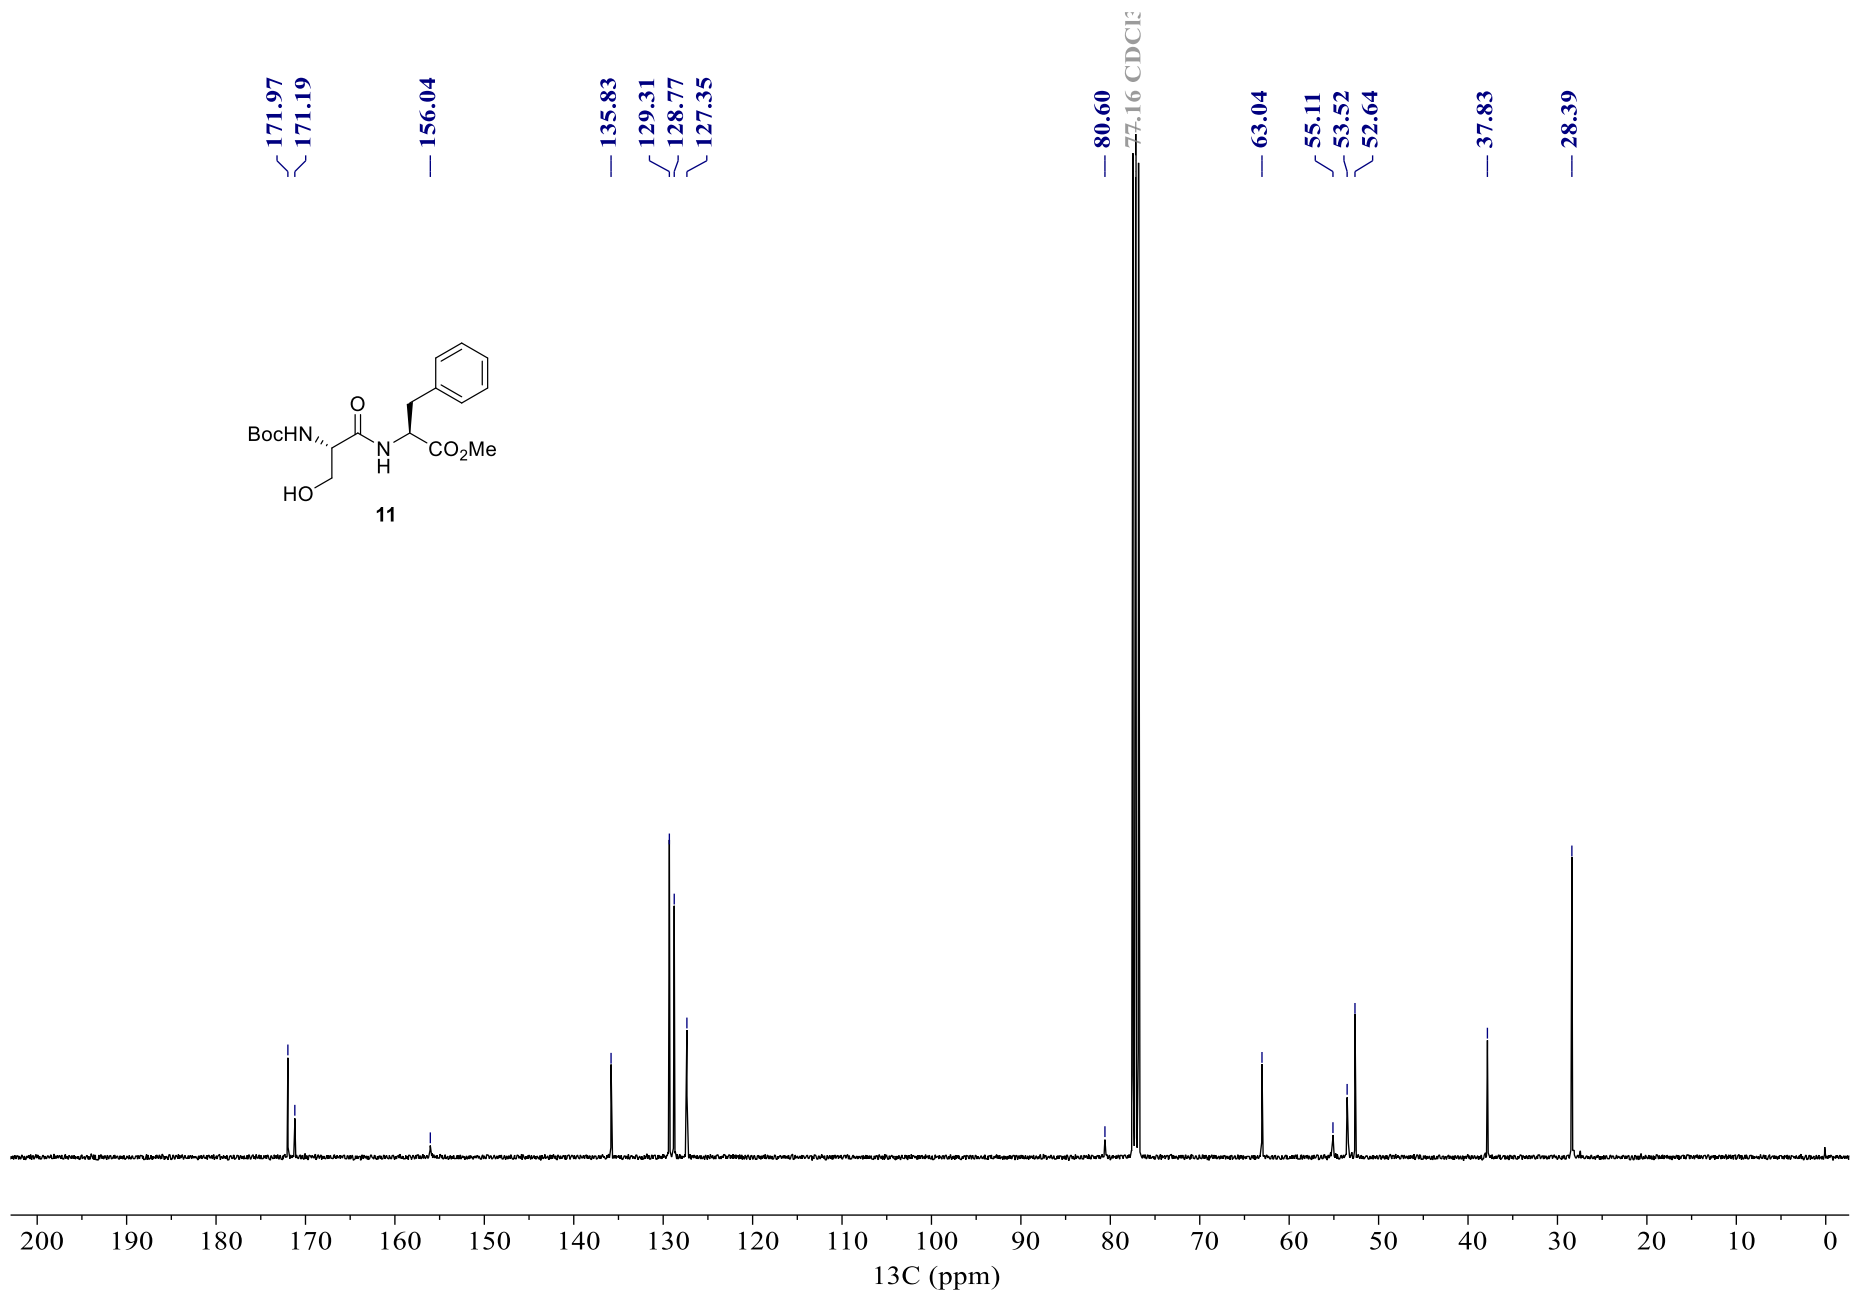



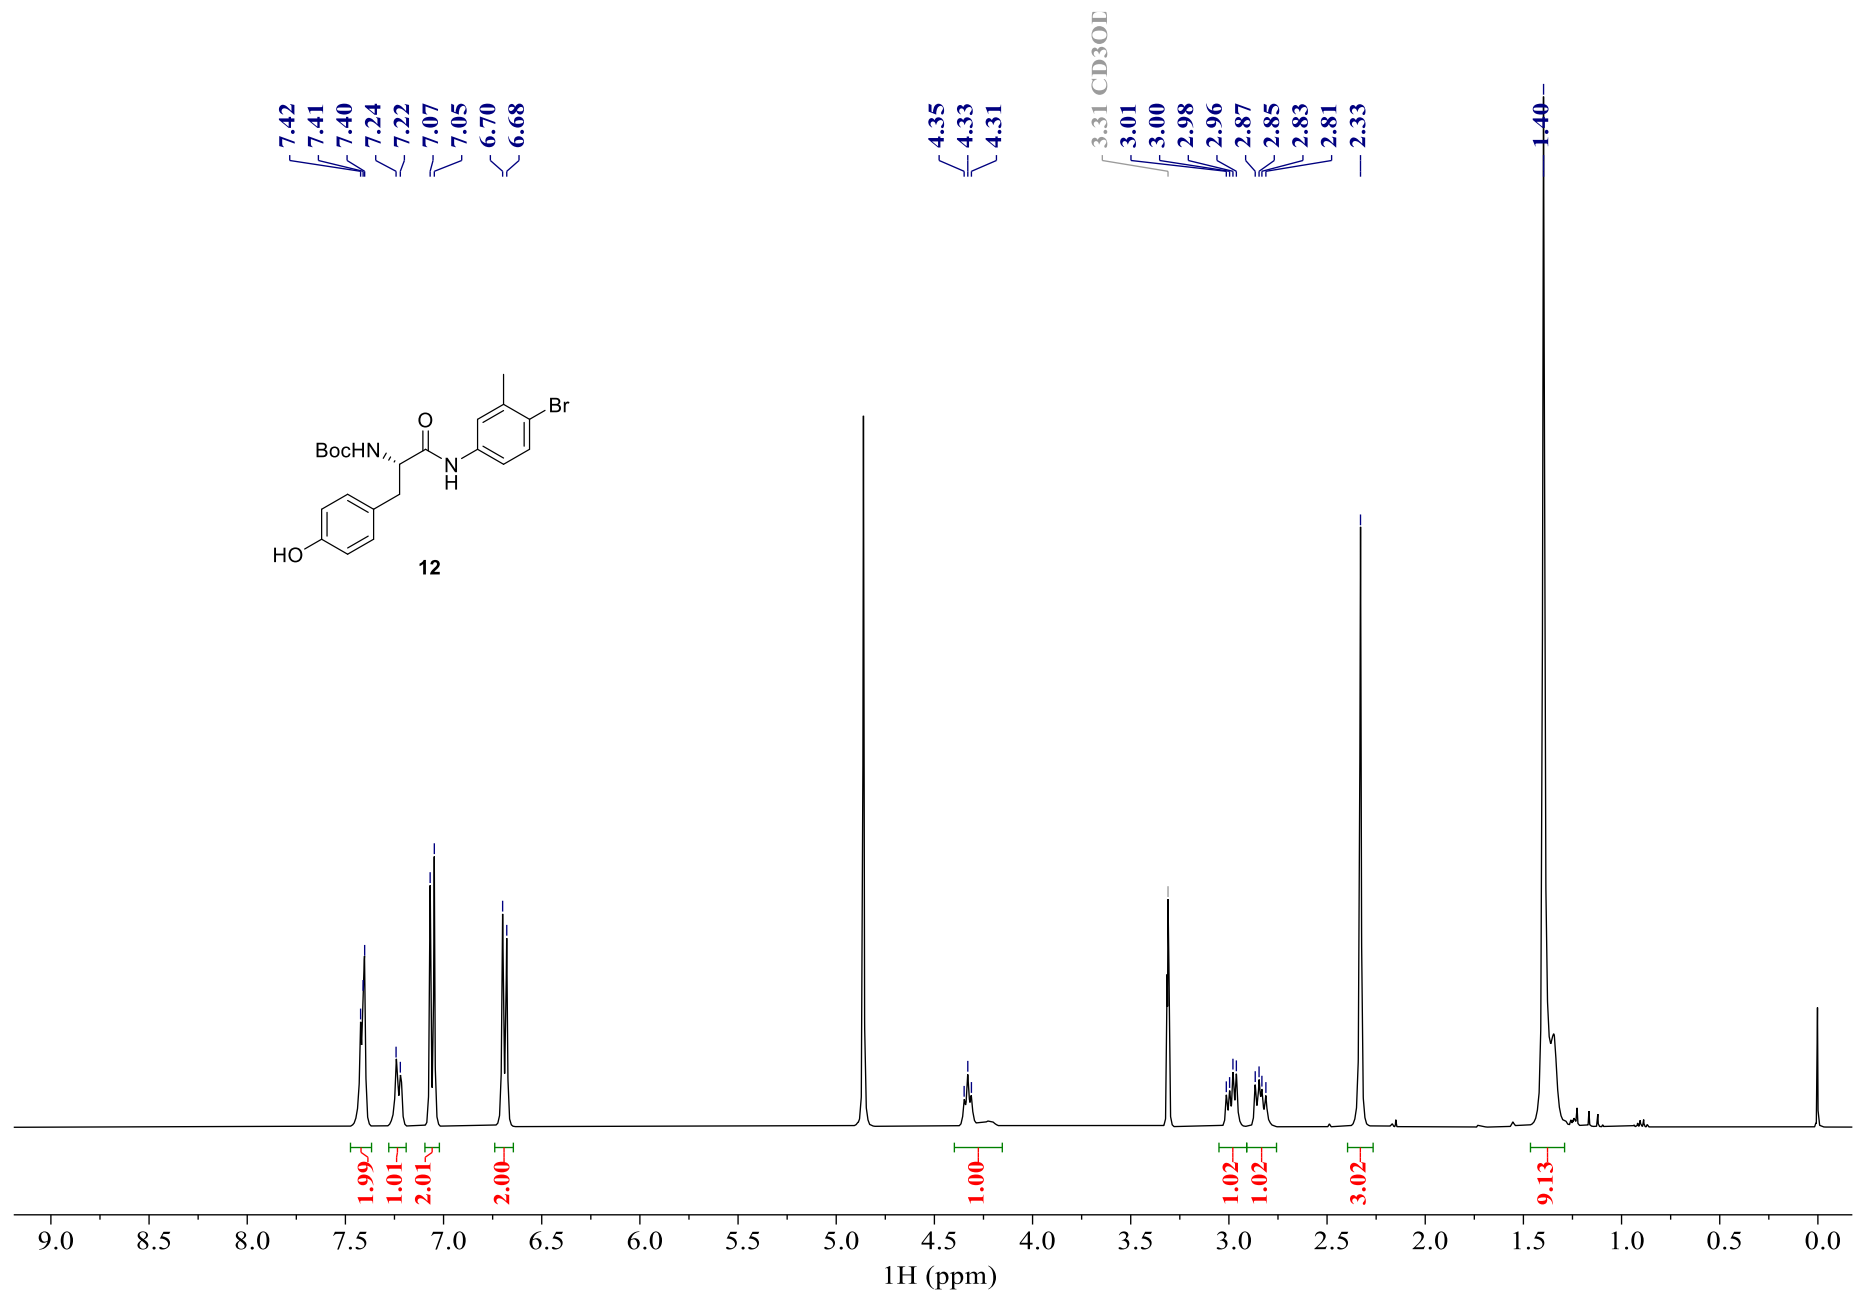

S53



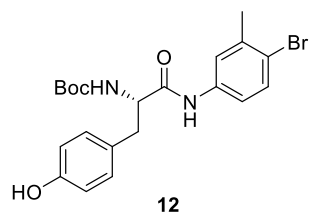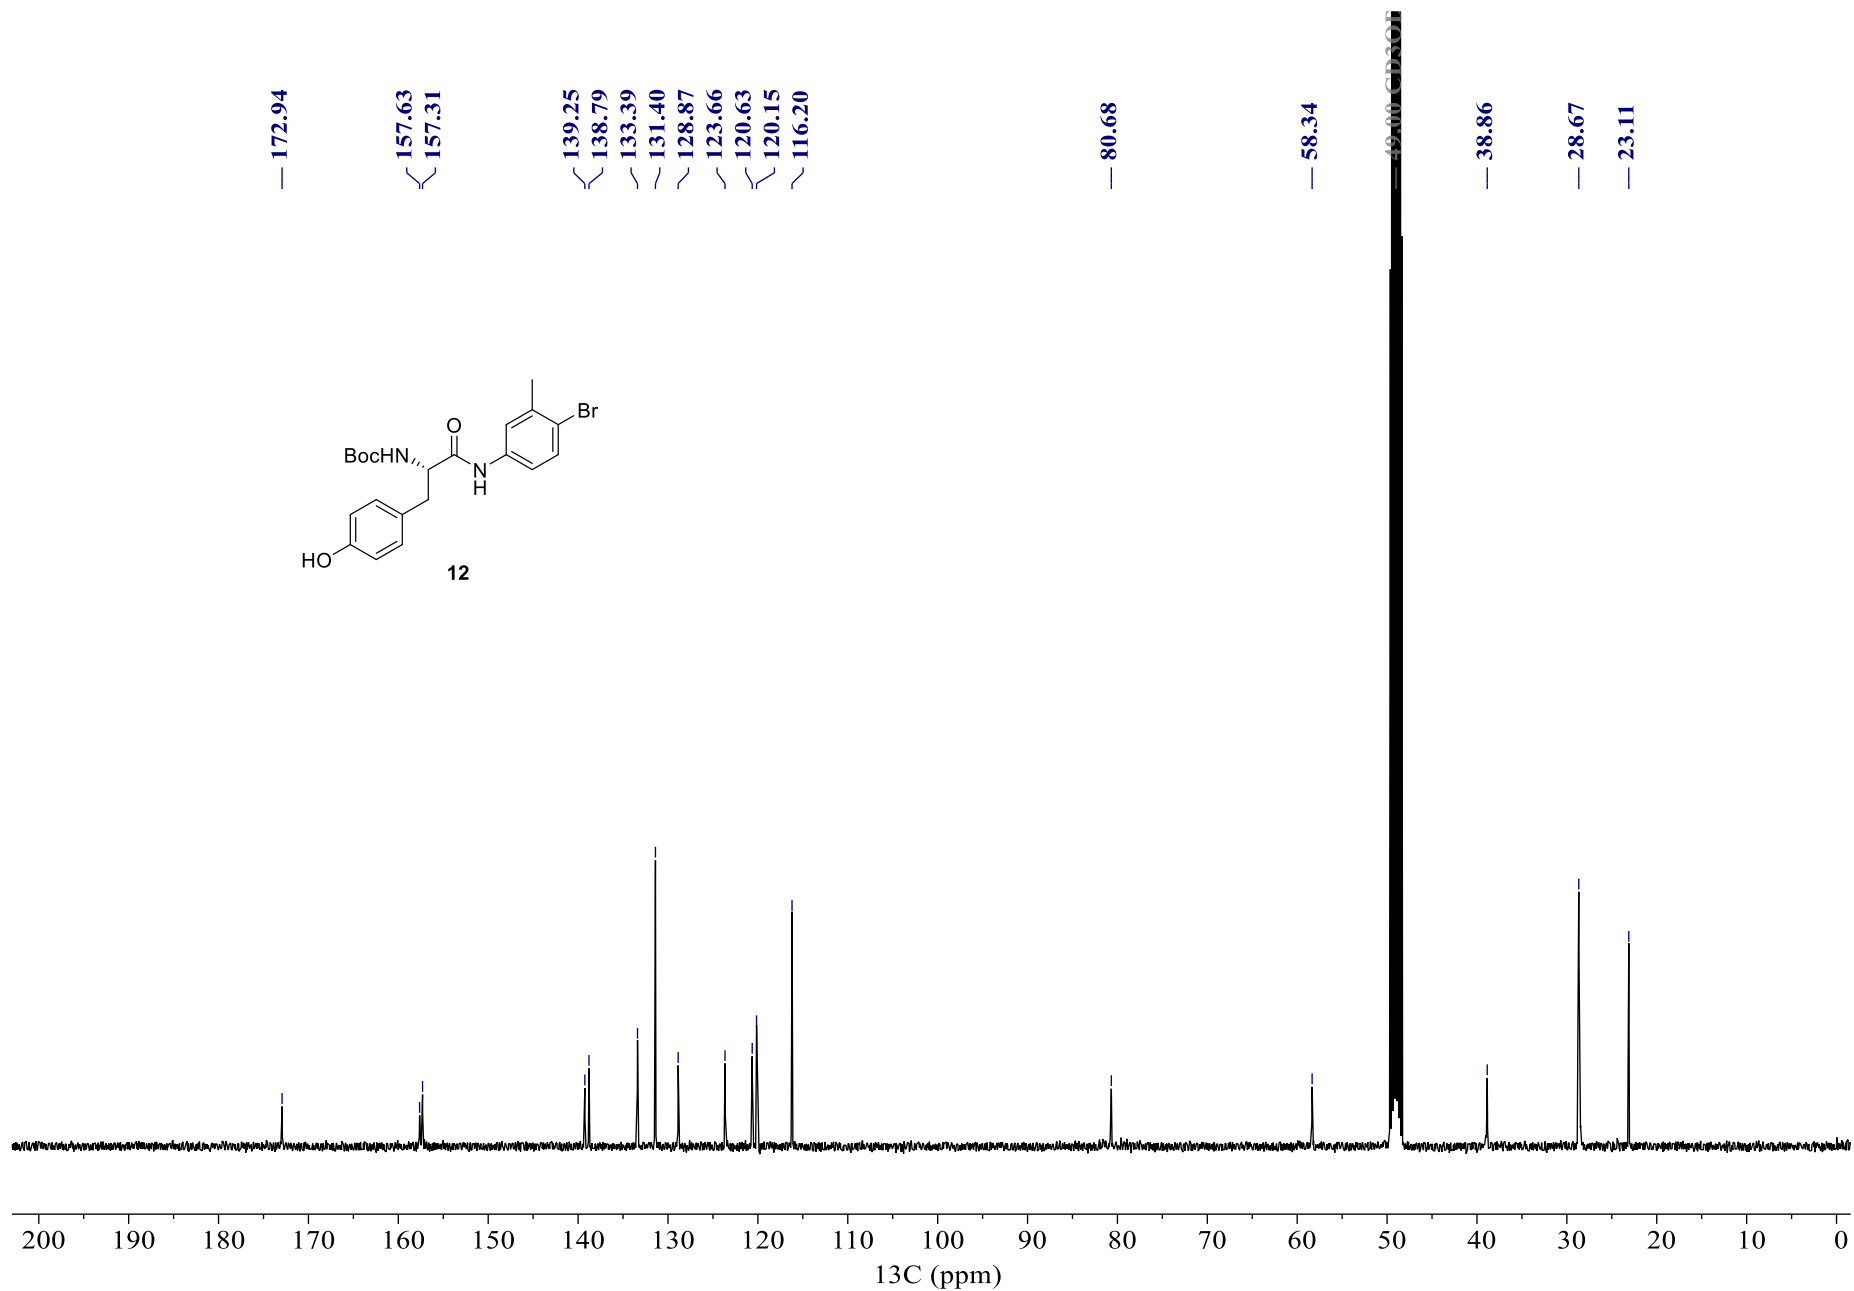



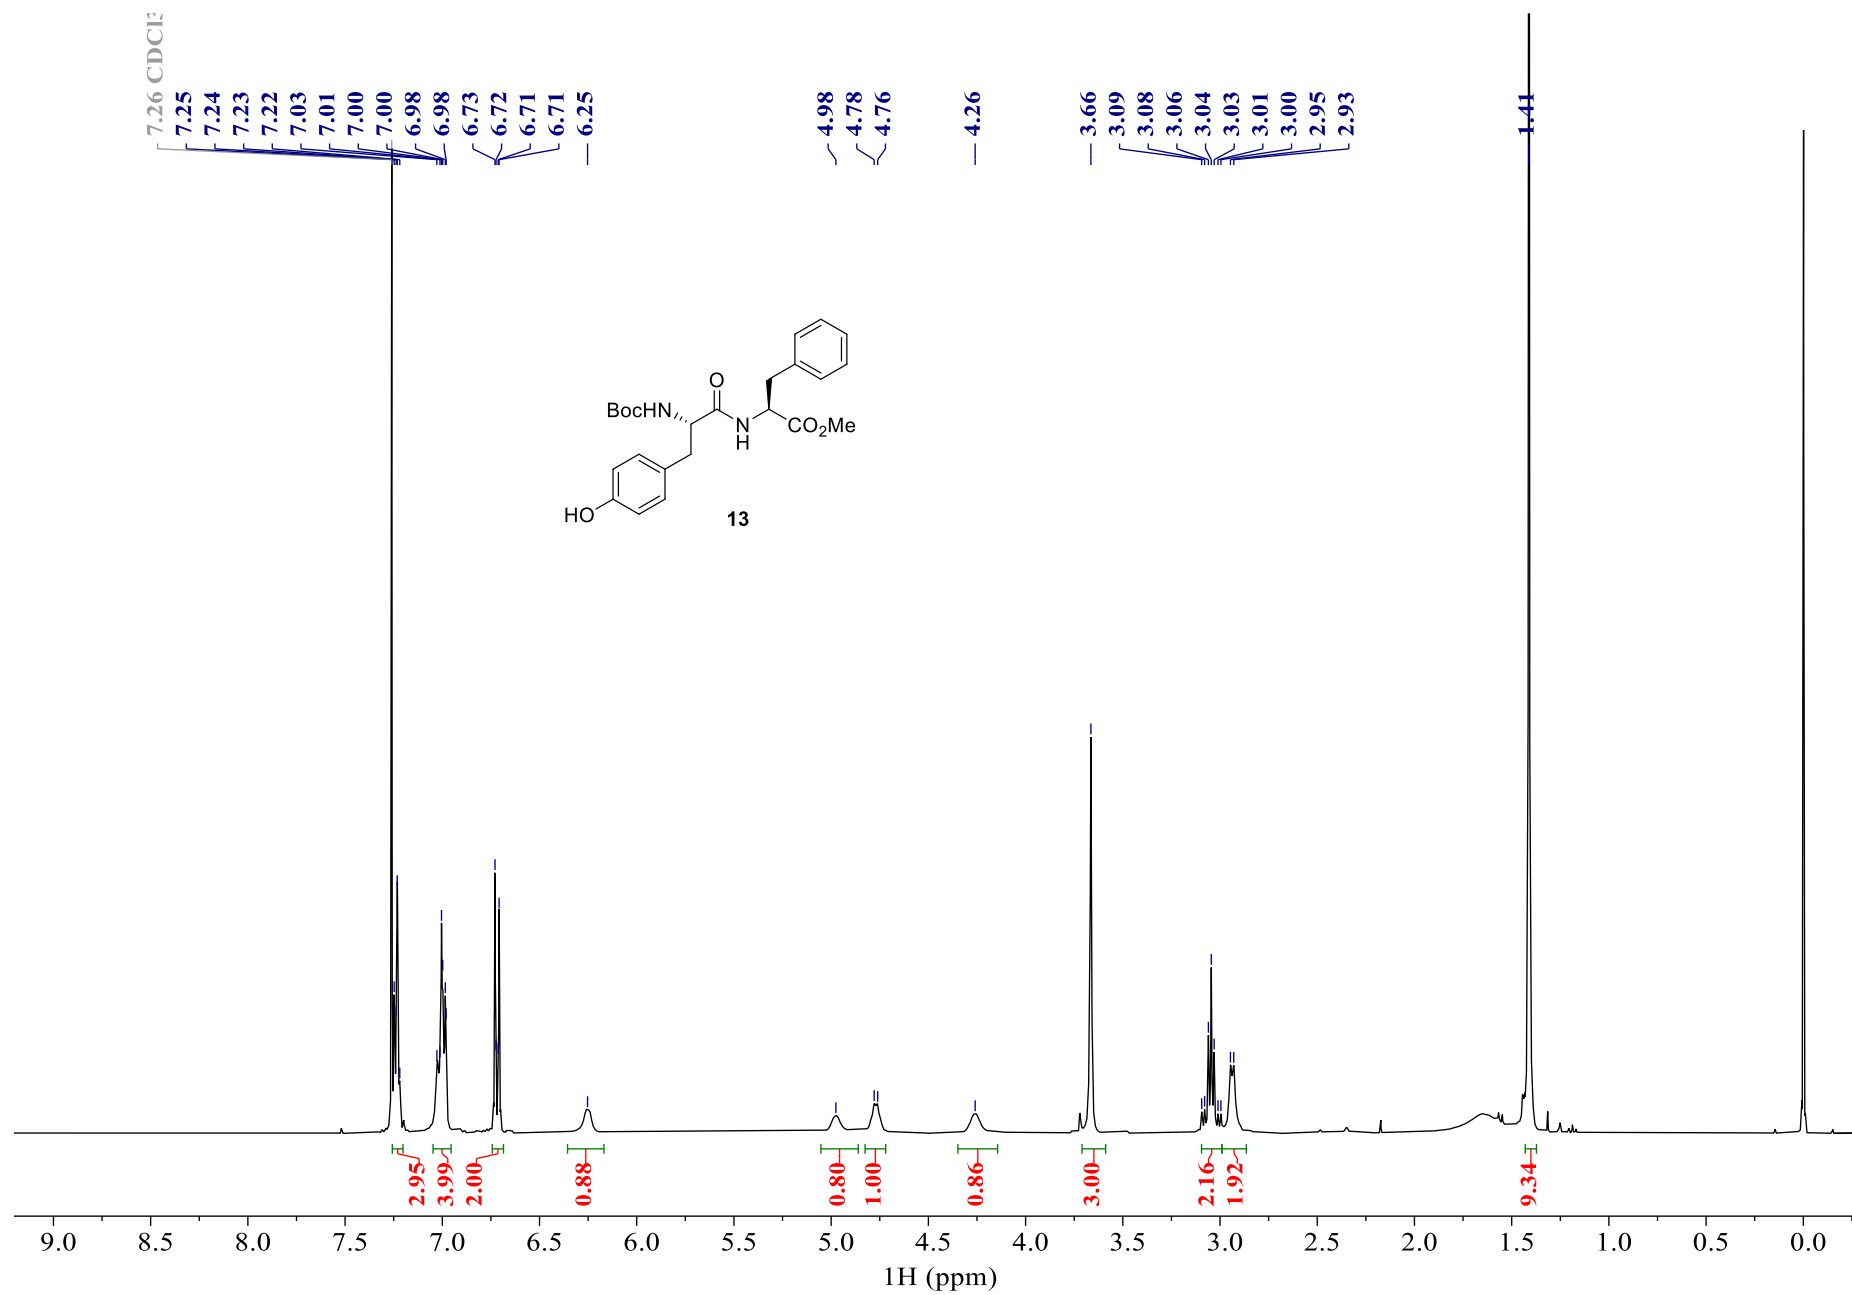



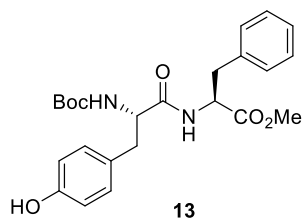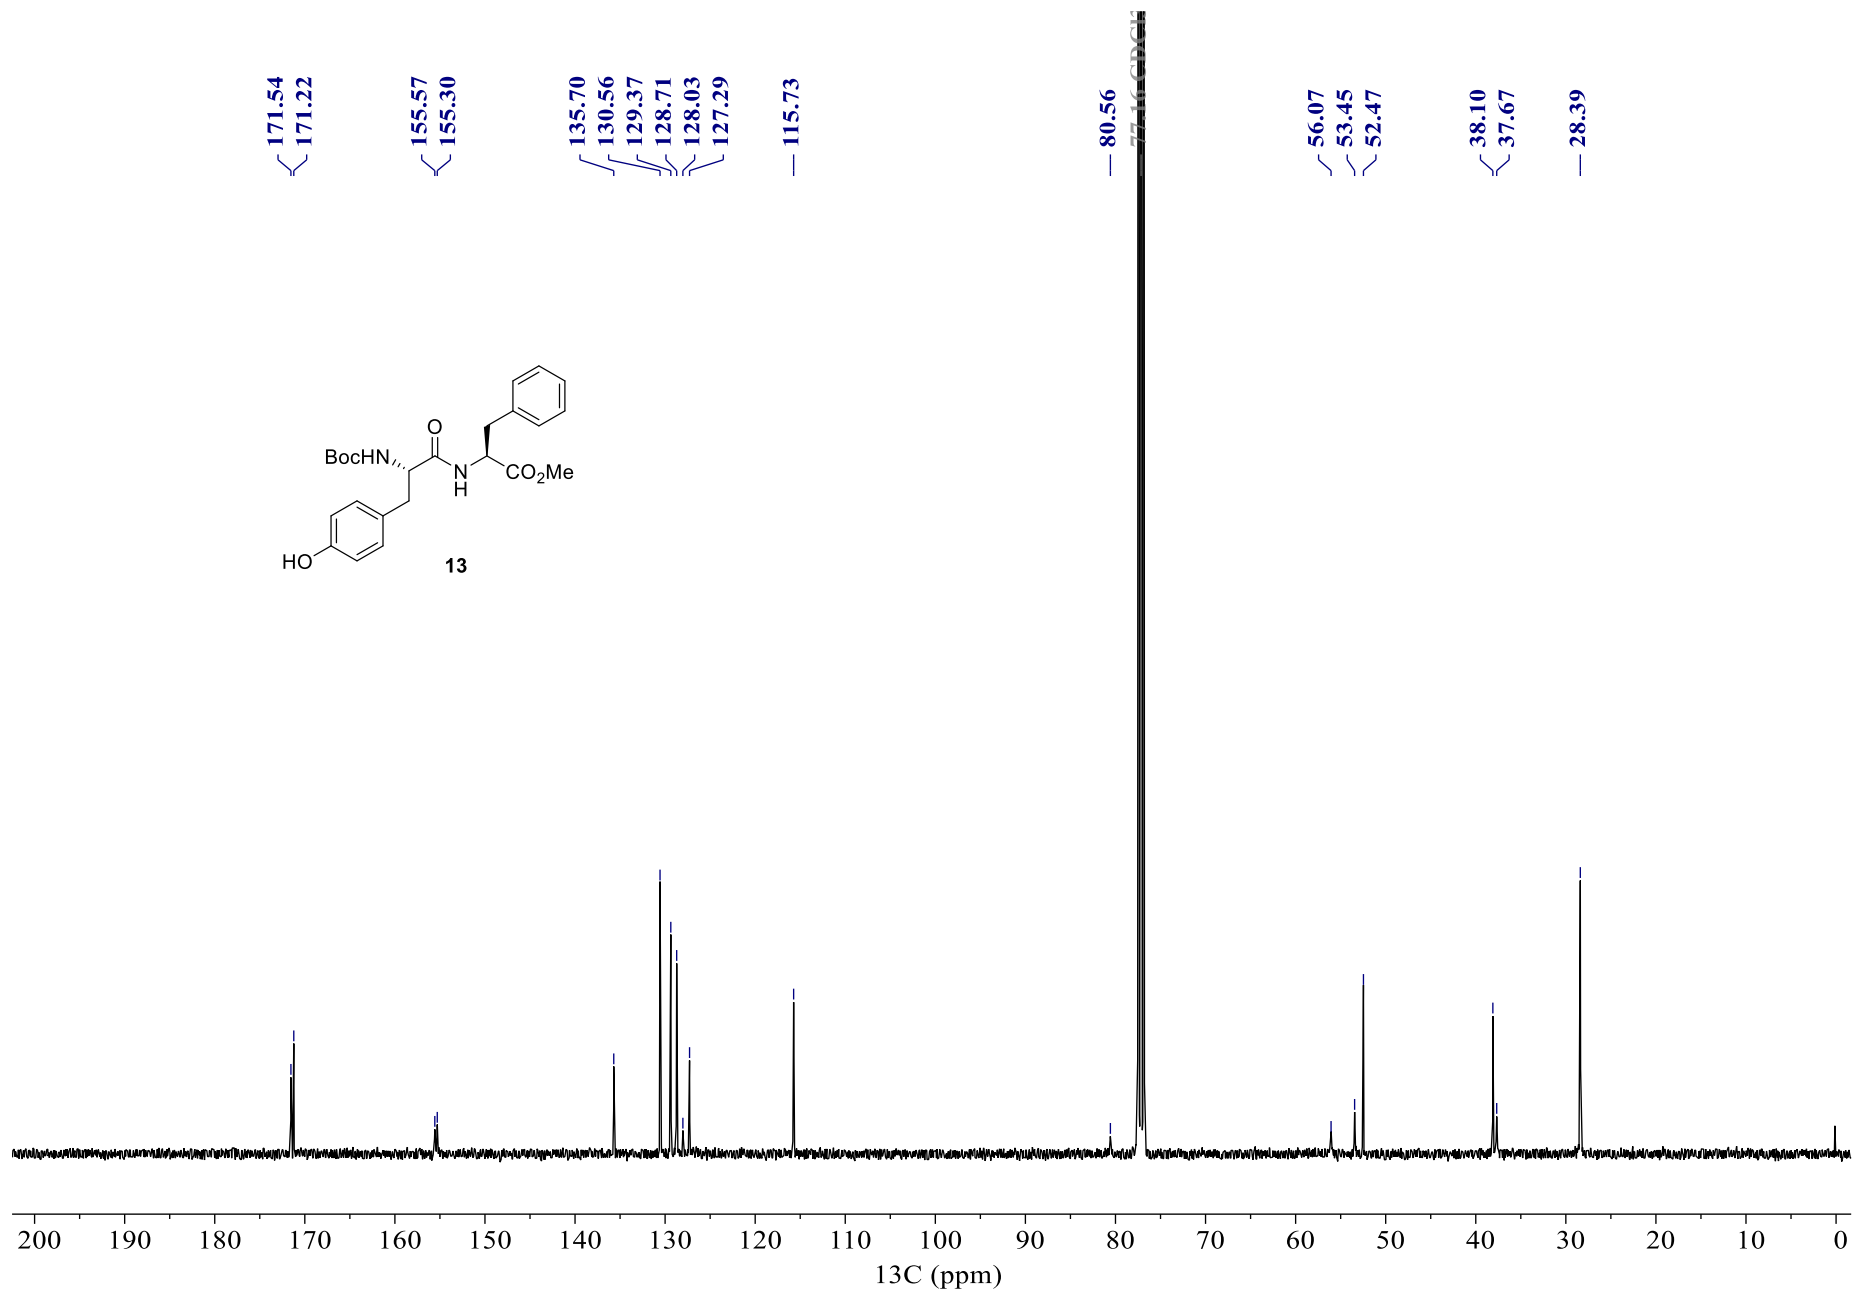



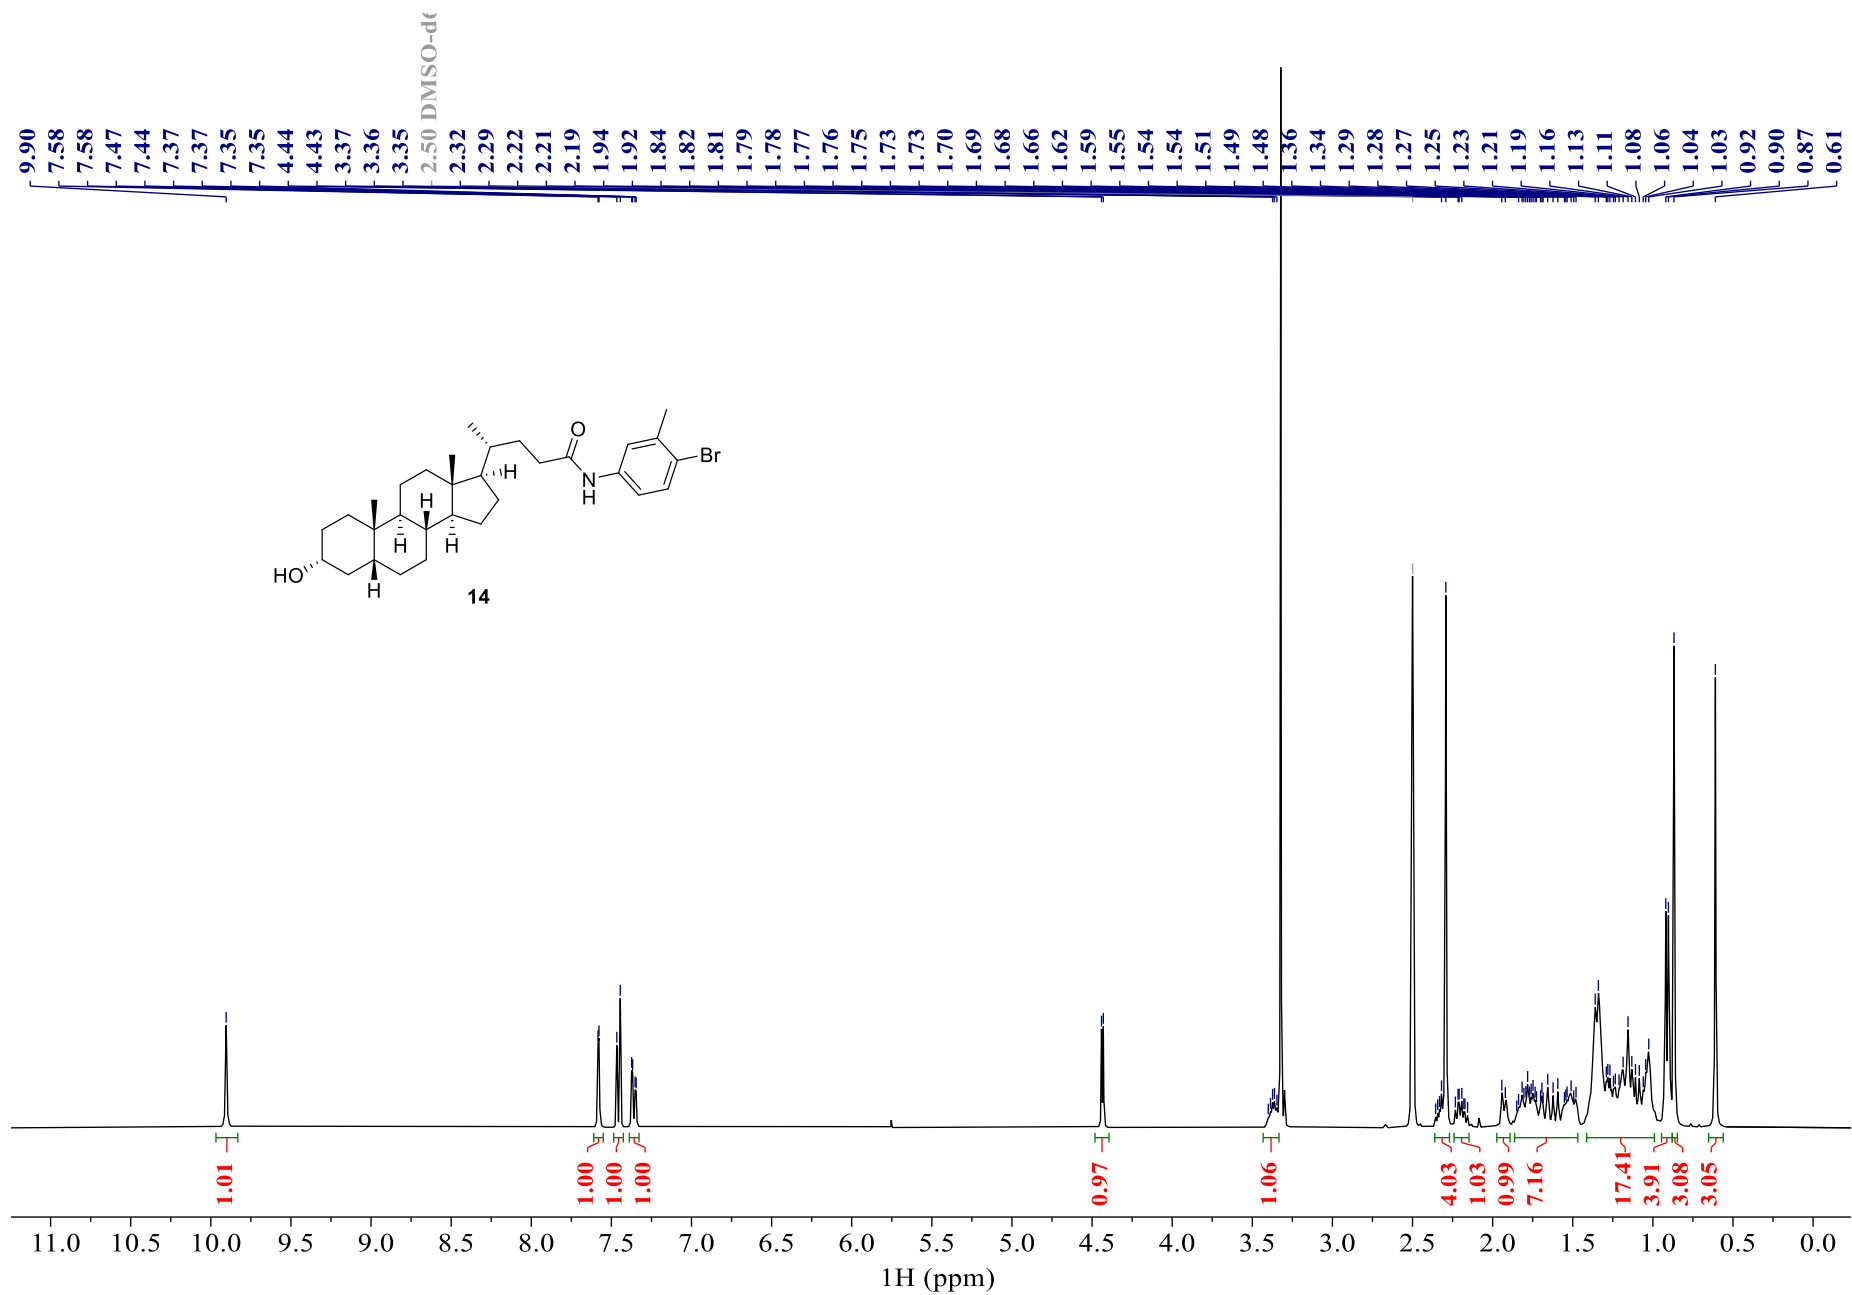



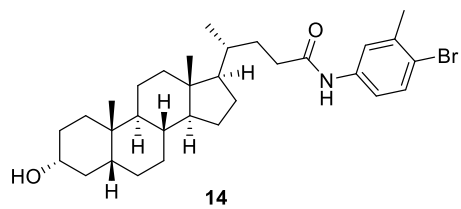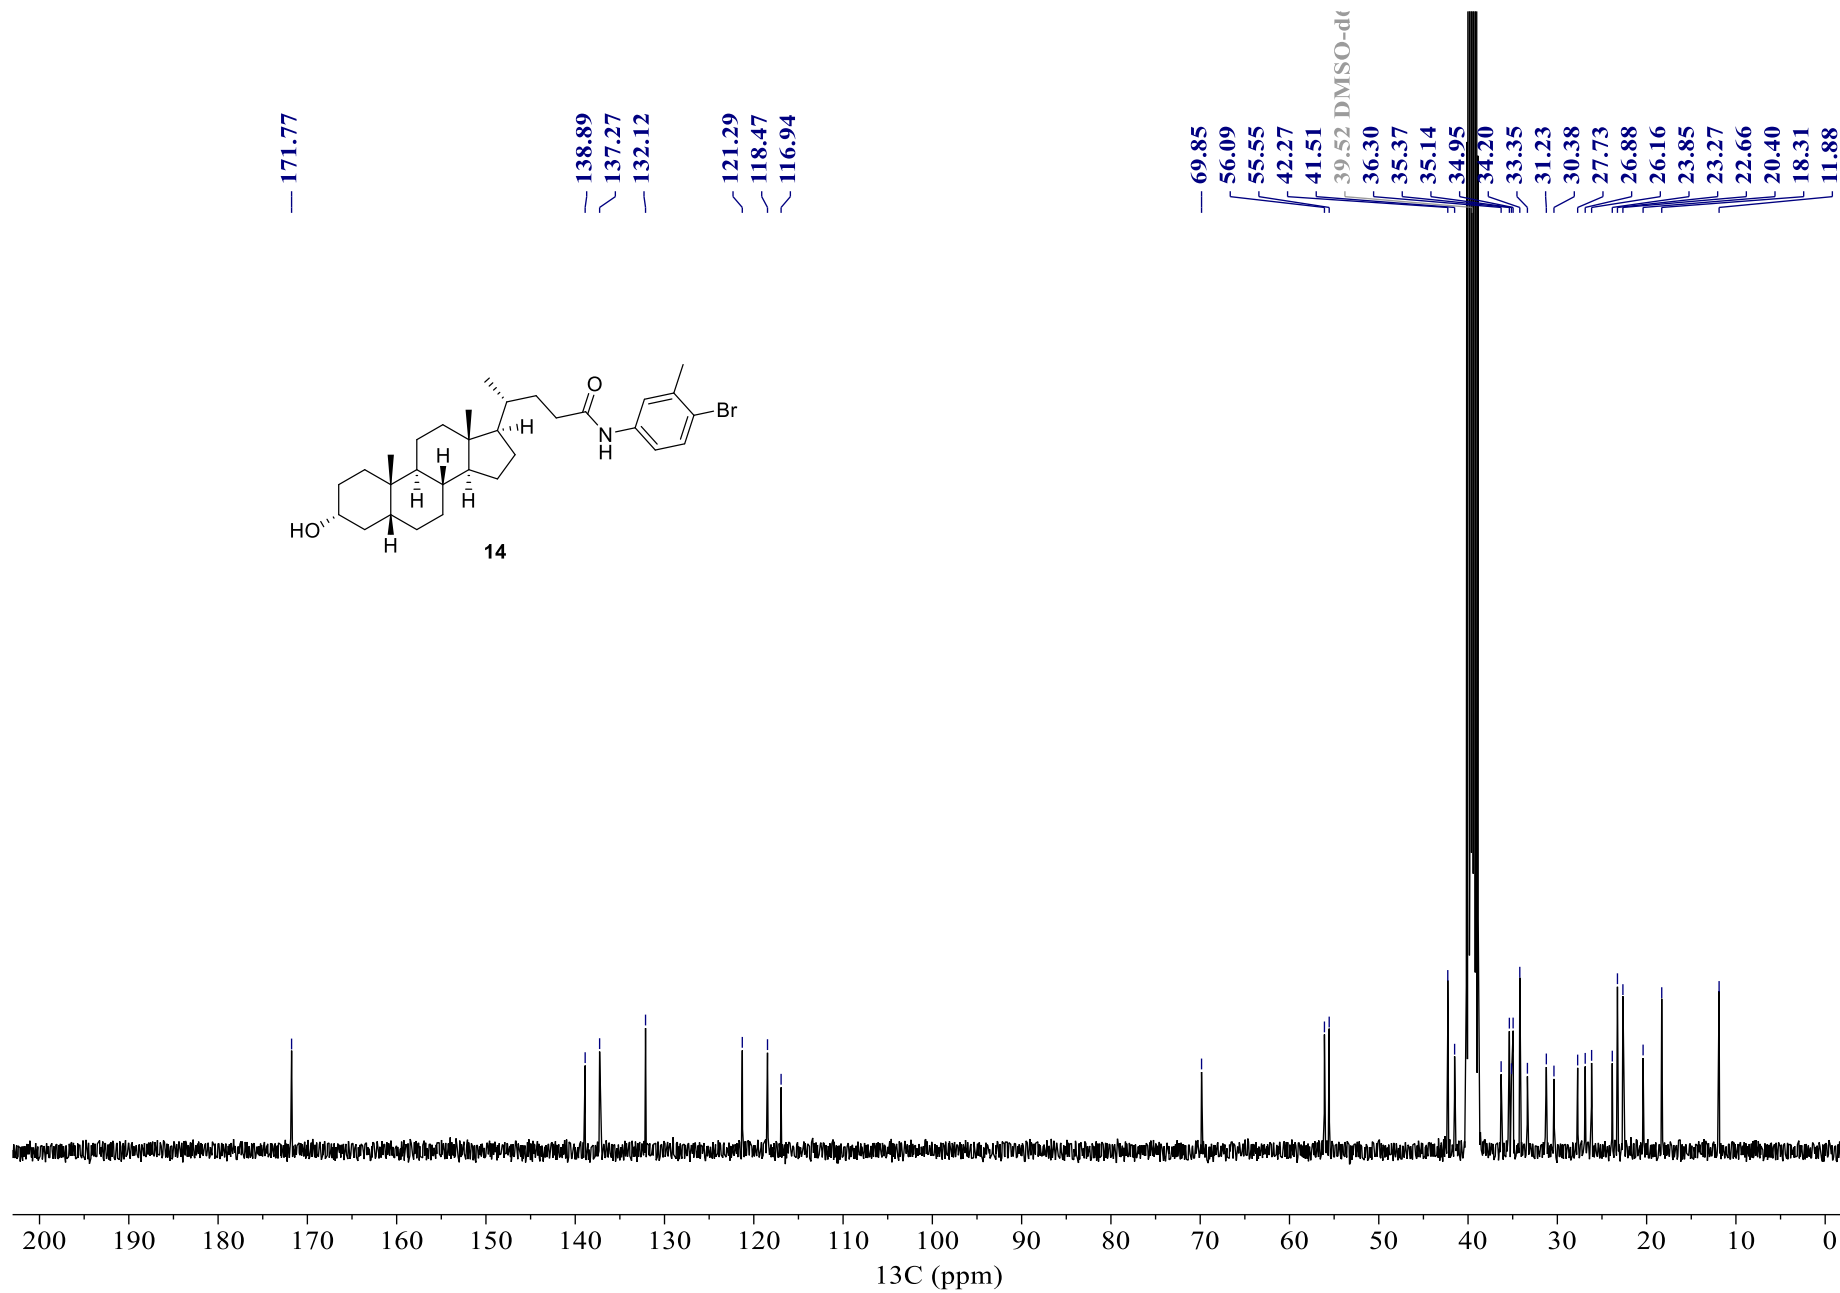



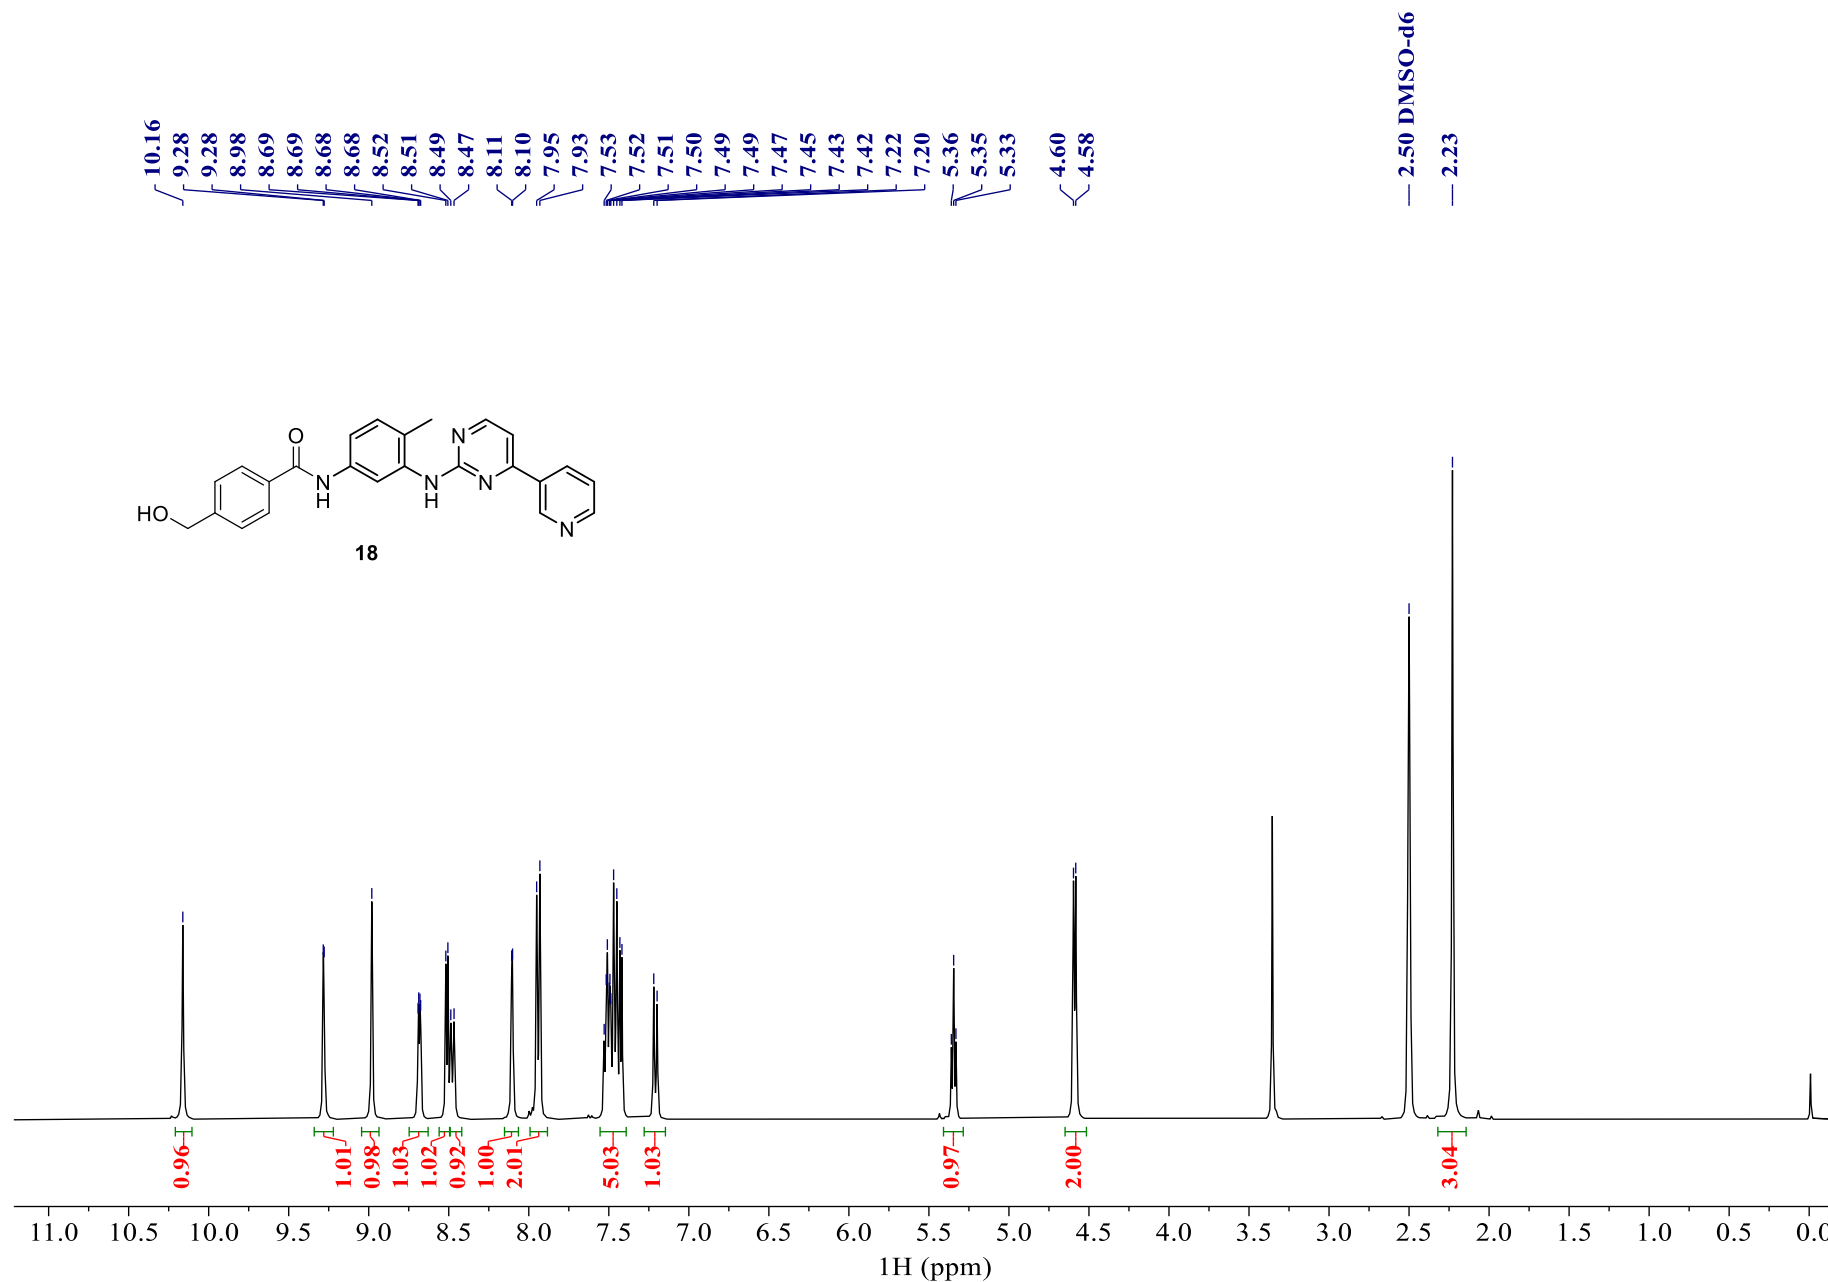



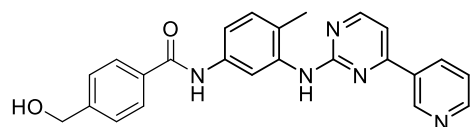

18

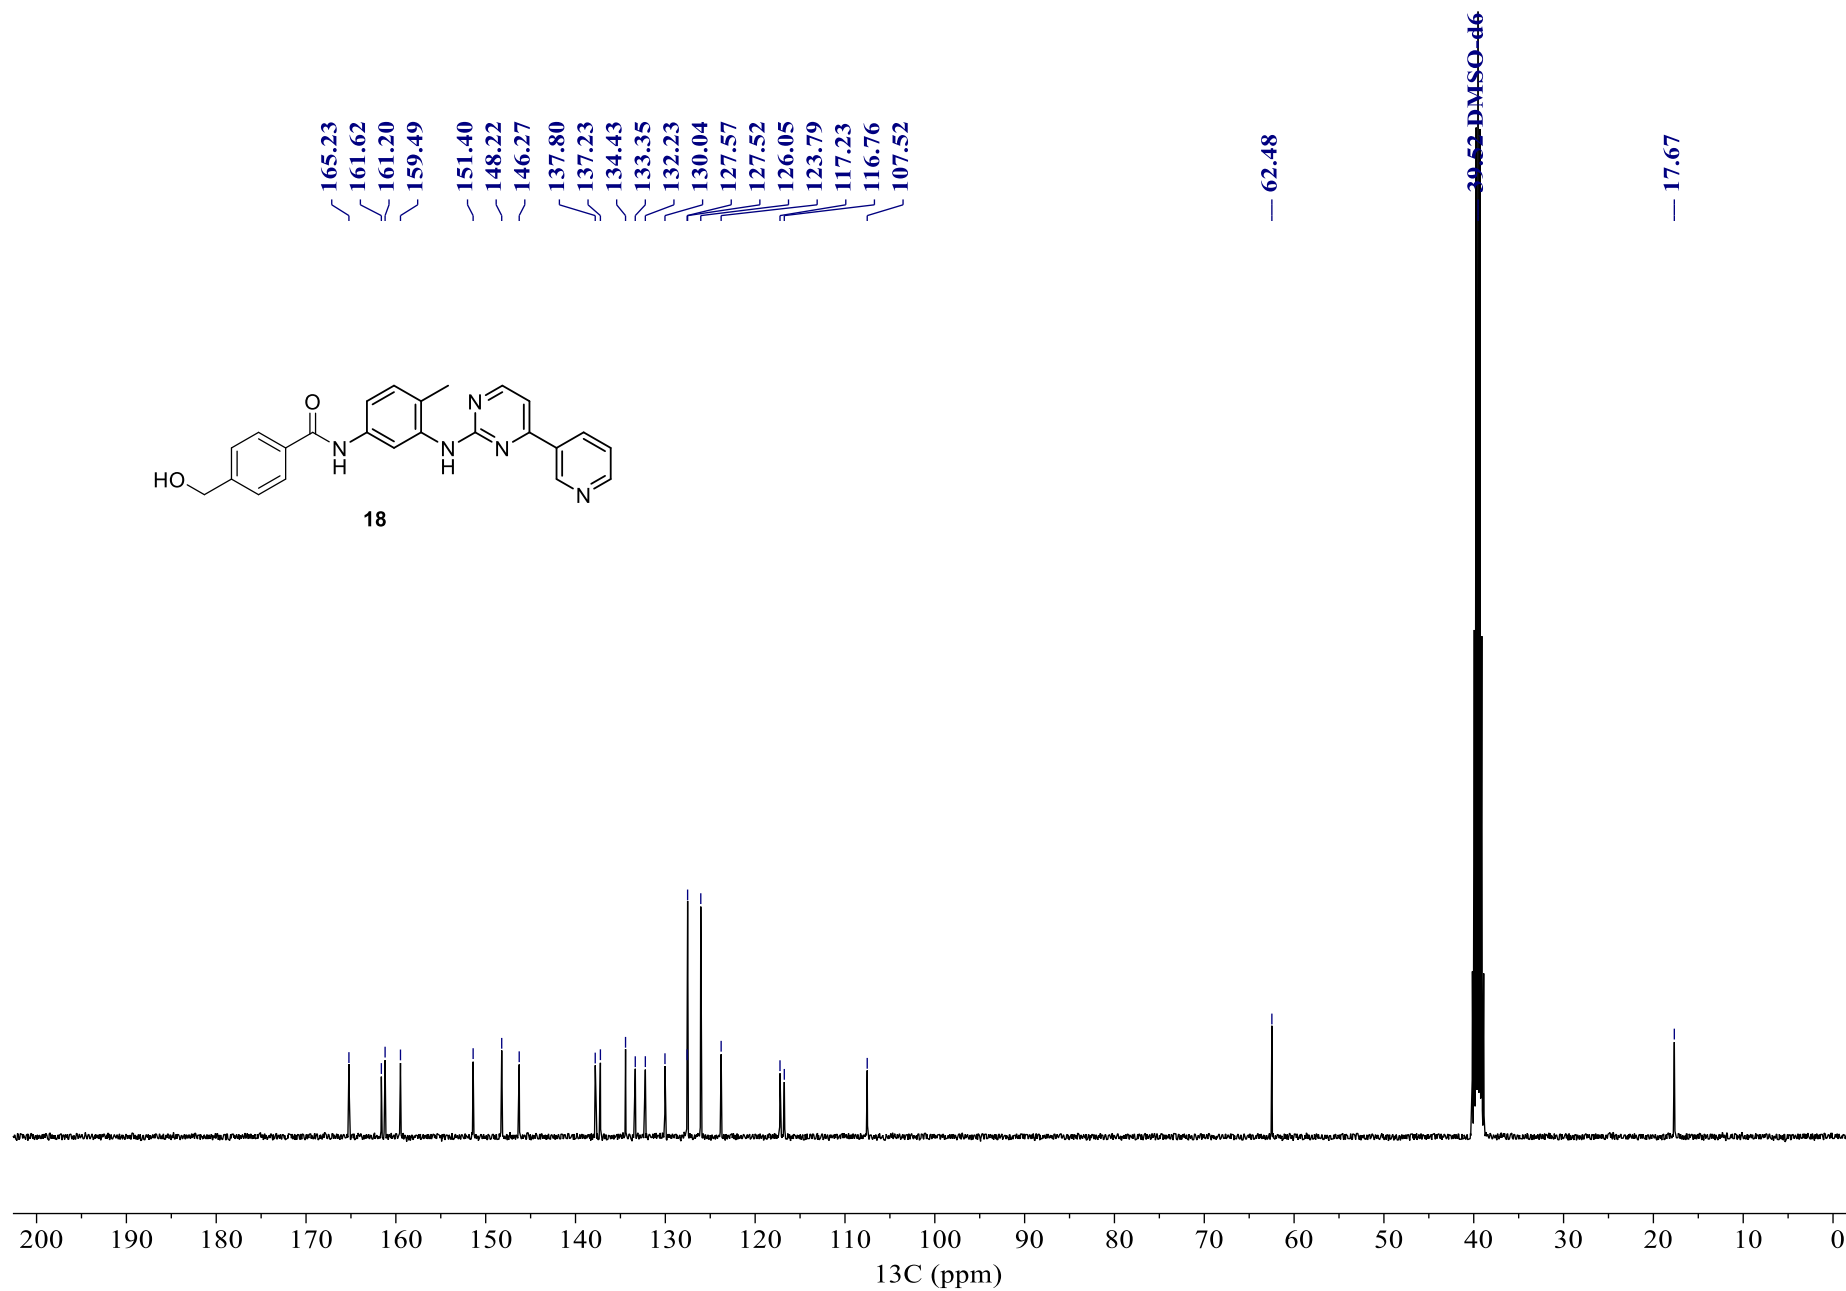



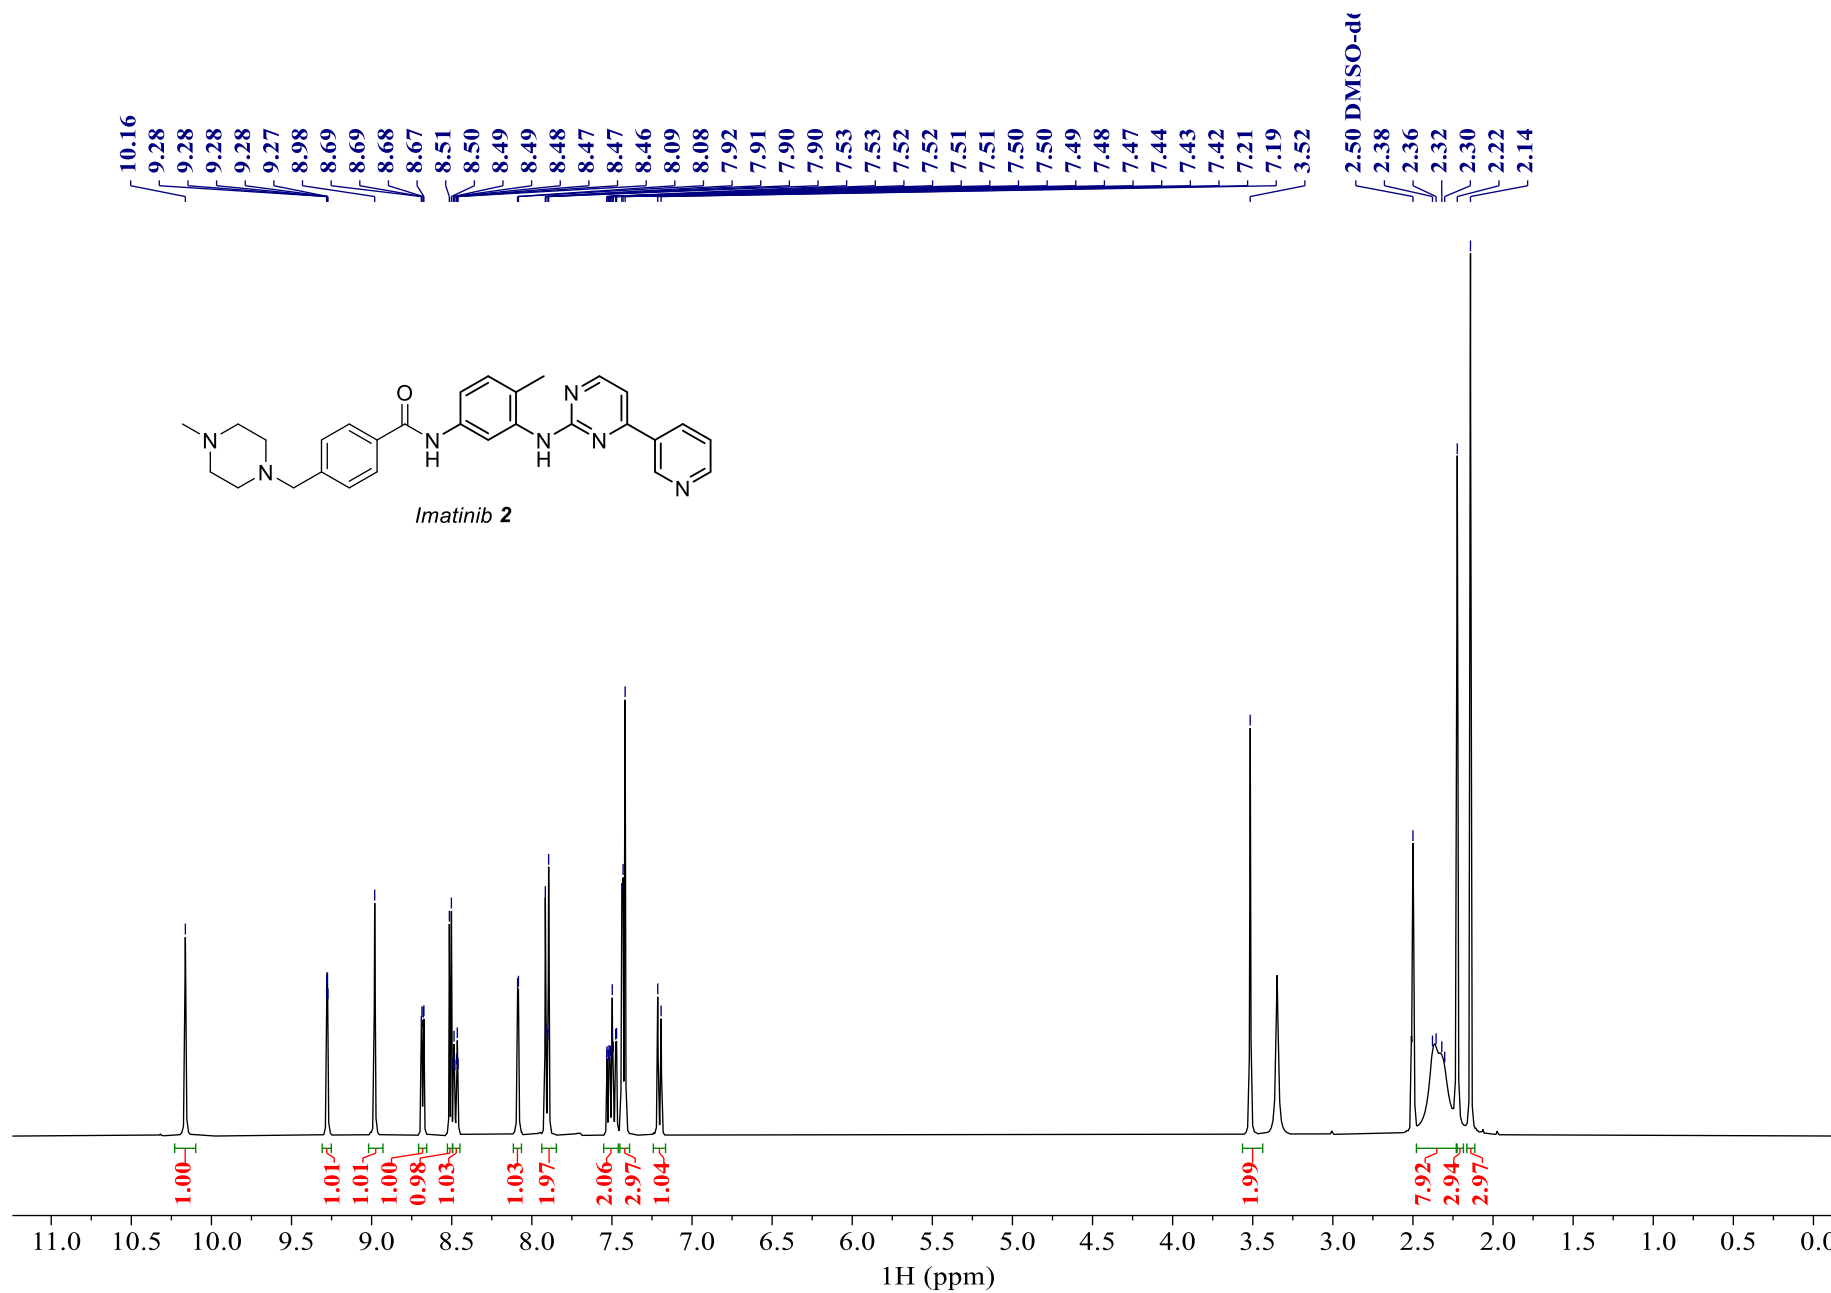



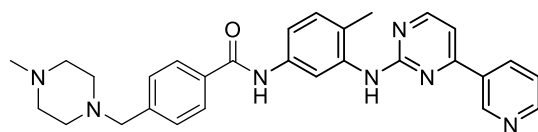

Imatinib 2

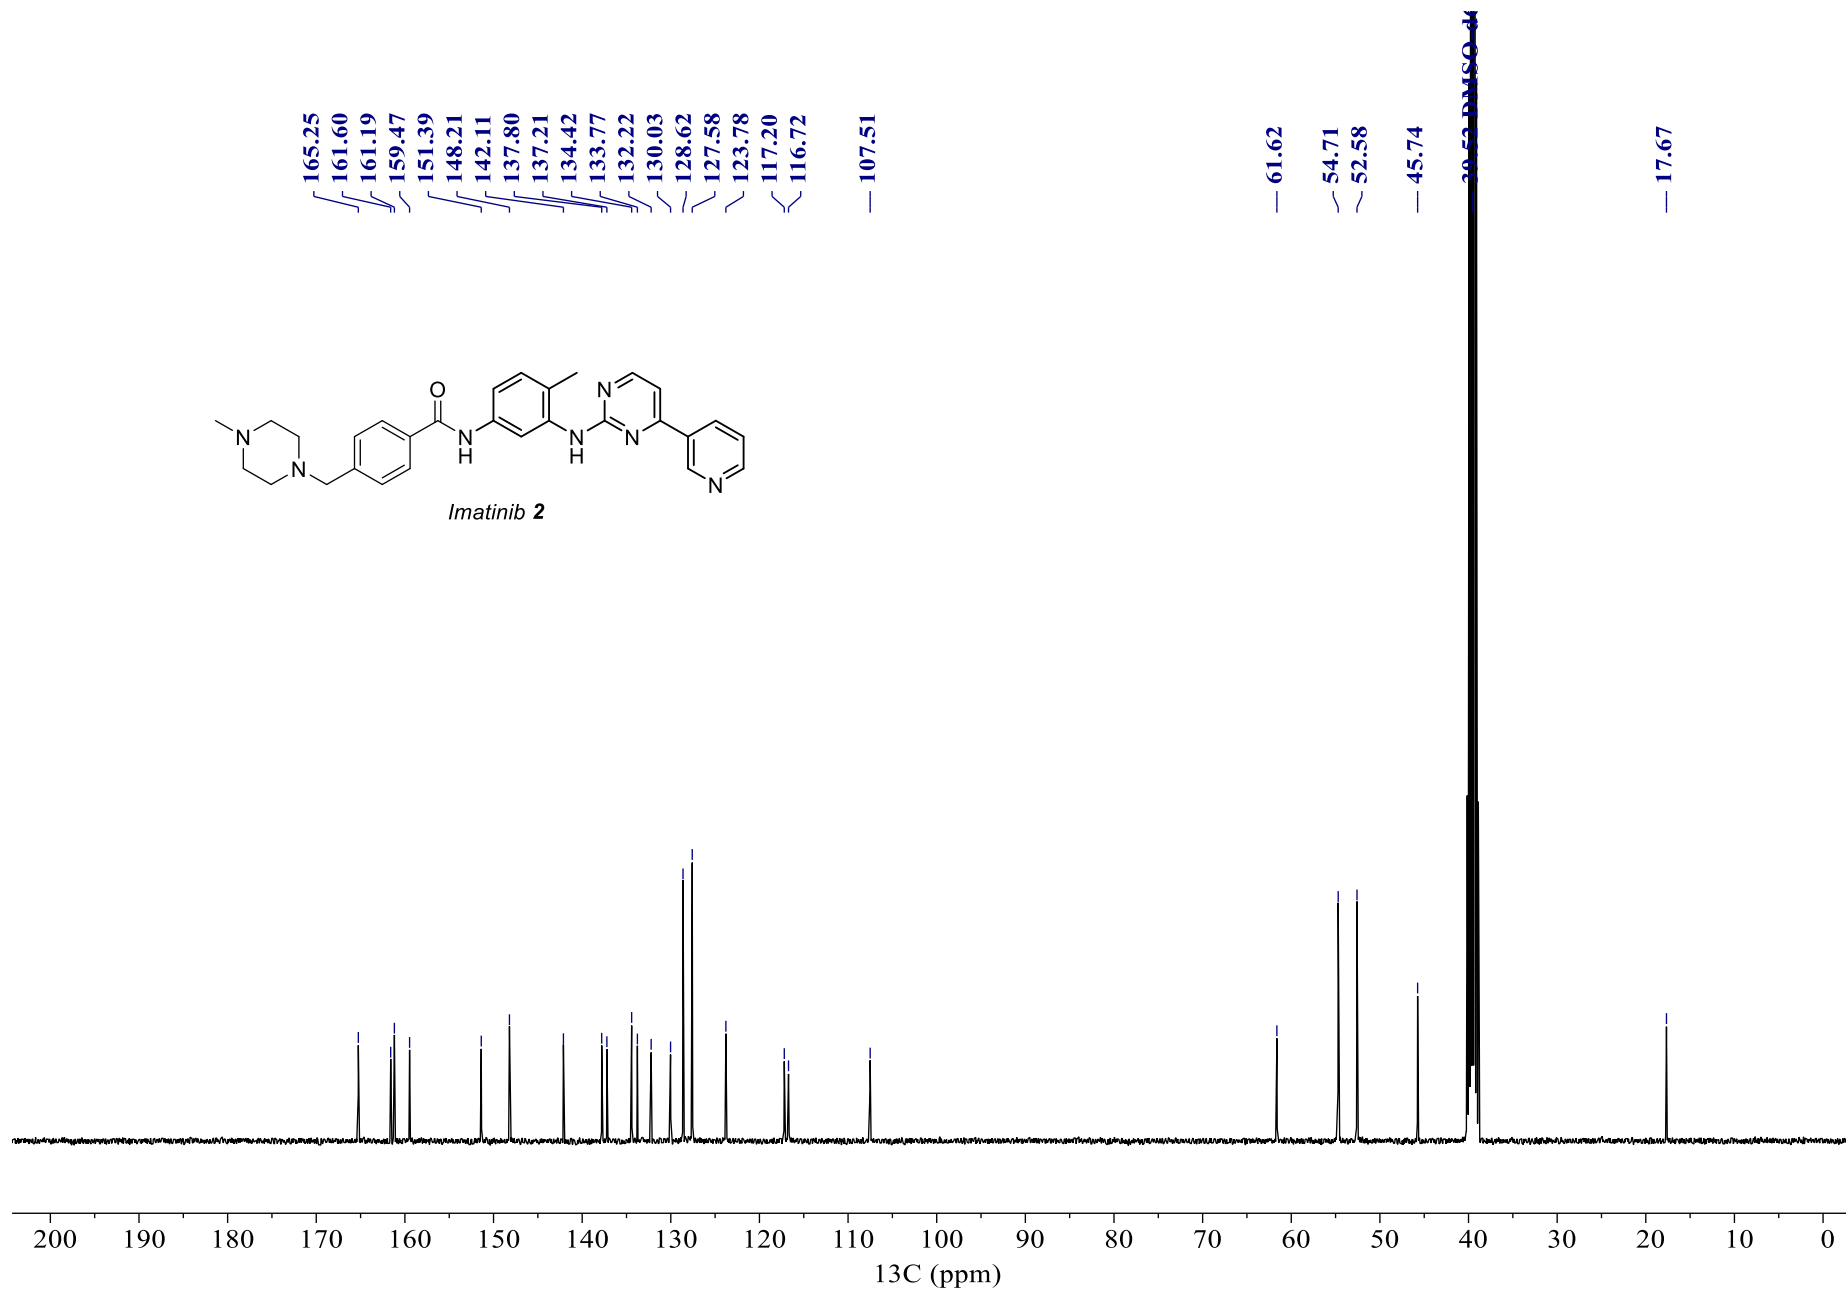

Supplement: d4mr00006d1.pdf [file d4mr00006d1.pdf]
